# Supplementary material for: Metabolic and Structural Insights into Hydrogen Sulfide Mis-Regulation in Enterococcus faecalis
Source: Antioxidants (Basel). 2022 Aug 19;11(8):1607. doi: 10.3390/antiox11081607 (PMC9405070; doi:10.3390/antiox11081607)
Supplement: Supplementary file 1 [file antioxidants-11-01607-s001.zip]

Archive with 4 entries (4 files):
- antioxidants-1833704 Supplementary.pdf
- Supplemental Table S1_walsh.xlsx
- Supplemental Table S2_walsh.xlsx
- supplemental_video_S1_walsh.mp4
