# Supplementary material for: Metabolic and Structural Insights into Hydrogen Sulfide Mis-Regulation in Enterococcus faecalis
Source: Antioxidants (Basel). 2022 Aug 19;11(8):1607. doi: 10.3390/antiox11081607 (PMC9405070; doi:10.3390/antiox11081607)
Supplement: Supplementary file 1 [file antioxidants-11-01607-s001.zip › Supplemental Table S1_walsh.xlsx]

## Sheet: Wild-type Proteomics
UniProtID	Locus Taga	Locus Tagb	Gene Name	Functionc	detected times out of 4 WT	detected times out of 4 WT+Na2S	WT (normalized protein abundance)	WT+Na2S (normalized protein abundance)	log2_(WT+Na2S/WT)	-log p
A0A125W7J5	OG1RF_RS00515	OG1RF_10103	HMPREF9498_01155	YfcC family protein	2	0	1.79948e-07	#DIV/0!	#DIV/0!	-
A0A125W712	OG1RF_RS00230	OG1RF_10045	mrnC	Mini-ribonuclease 3	2	0	1.19465e-07	#DIV/0!	#DIV/0!	-
A0A125W226	OG1RF_RS05665	OG1RF_11093	HMPREF9498_03285	hypothetical protein	2	0	1.95735e-06	#DIV/0!	#DIV/0!	-
A0A125W6M5	OG1RF_RS10785	OG1RF_12109	HMPREF9498_01355	D-alanyl-lipoteichoic acid biosynthesis protein DltD	2	0	3.80898e-07	#DIV/0!	#DIV/0!	-
A0A125W306	OG1RF_RS09765	OG1RF_11909	HMPREF9498_02853	hypothetical protein	2	0	6.13785e-07	#DIV/0!	#DIV/0!	-
A0A125W3T8	OG1RF_RS08490	OG1RF_11656	HMPREF9498_02392	ABC transporter permease	2	0	9.83537e-07	#DIV/0!	#DIV/0!	-
A0A125W962	OG1RF_RS11220	OG1RF_12193	HMPREF9498_00440	glycosyl transferase family 1	2	0	9.26365e-07	#DIV/0!	#DIV/0!	-
A0A125W483	OG1RF_RS08600	OG1RF_11677	HMPREF9498_02352	metal ABC transporter ATP-binding protein	2	0	5.17014e-07	#DIV/0!	#DIV/0!	-
A0A125W9K0	OG1RF_RS02000	OG1RF_10370	HMPREF9498_00345	hypothetical protein	2	0	3.78341e-06	#DIV/0!	#DIV/0!	-
A0A125W2L0	OG1RF_RS09605	OG1RF_11877	holA	DNA polymerase III subunit delta	2	0	1.8629e-07	#DIV/0!	#DIV/0!	-
A0A125W2N9	OG1RF_RS10425	OG1RF_12038	mgtE	magnesium transporter MgtE	2	0	1.56762e-06	#DIV/0!	#DIV/0!	-
A0A125W269	OG1RF_RS09845	OG1RF_11924	HMPREF9498_02836	DUF5011 domain-containing protein	2	0	1.91377e-07	#DIV/0!	#DIV/0!	-
A0A125W2Q0	OG1RF_RS09845	OG1RF_11924	HMPREF9498_02835	DUF5011 domain-containing protein	2	0	4.8189e-07	#DIV/0!	#DIV/0!	-
A0A125W2A3	OG1RF_RS09755	OG1RF_11907	HMPREF9498_02856	penicillin-binding protein	2	0	1.05728e-06	#DIV/0!	#DIV/0!	-
A0A125W2X5	OG1RF_RS10110	OG1RF_11976	HMPREF9498_02779	PTS beta-glucoside transporter subunit EIIBCA	2	0	2.45501e-06	#DIV/0!	#DIV/0!	-
A0A125W421	OG1RF_RS02855	OG1RF_10543	HMPREF9498_02246	hypothetical protein	2	0	4.26307e-07	#DIV/0!	#DIV/0!	-
A0A125W276	OG1RF_RS06260	OG1RF_11208	ntpI	V-type ATP synthase subunit I	2	0	3.35884e-06	#DIV/0!	#DIV/0!	-
A0A125W434	OG1RF_RS08700	OG1RF_11695	HMPREF9498_02331	DUF3816 family protein	3	0	4.62549e-06	#DIV/0!	#DIV/0!	-
A0A125W8S4	OG1RF_RS01945	OG1RF_10359	HMPREF9498_00698	ferrous iron transport protein A	3	0	4.55082e-07	#DIV/0!	#DIV/0!	-
A0A125W318	OG1RF_RS12270	OG1RF_12395	HMPREF9498_02654	hypothetical protein	3	0	2.07781e-06	#DIV/0!	#DIV/0!	-
A0A125W5C7	OG1RF_RS07295	OG1RF_11416	pstS	phosphate ABC transporter substrate-binding protein	3	0	5.49061e-07	#DIV/0!	#DIV/0!	-
A0A125W475	OG1RF_RS08655	OG1RF_11686	HMPREF9498_02341	hypothetical protein	3	0	5.488e-07	#DIV/0!	#DIV/0!	-
A0A125W9V7	OG1RF_RS08165	OG1RF_11592	glpK	glycerol kinase	3	0	4.32466e-07	#DIV/0!	#DIV/0!	-
A0A125W1P1	OG1RF_RS06505	OG1RF_11257	scpA	segregation/condensation protein A	3	0	9.36522e-07	#DIV/0!	#DIV/0!	-
A0A125W5Z5	OG1RF_RS07320	OG1RF_11421	HMPREF9498_01654	LysR family transcriptional regulator	0	2	#DIV/0!	9.57297e-07	#DIV/0!	-
A0A125W2G7	OG1RF_RS09450	OG1RF_11846	HMPREF9498_02920	phosphate starvation-inducible protein PhoH	0	2	#DIV/0!	5.04493e-07	#DIV/0!	-
A0A125W728	OG1RF_RS10825	OG1RF_12116	nrdG	anaerobic ribonucleoside-triphosphate reductase activating protein	0	2	#DIV/0!	3.53684e-07	#DIV/0!	-
A0A125W7L9	OG1RF_RS13030	OG1RF_12545	gidB	ribosomal RNA small subunit methyltransferase G	0	2	#DIV/0!	3.22694e-07	#DIV/0!	-
A0A125W2V7	OG1RF_RS12455	OG1RF_12437	HMPREF9498_02615	TIGR00282 family metallophosphoesterase	0	2	#DIV/0!	2.66317e-07	#DIV/0!	-
A0A125W932	OG1RF_RS00980	OG1RF_10196	HMPREF9498_00641	transcription repressor NadR	0	2	#DIV/0!	3.31342e-07	#DIV/0!	-
A0A125W9L8	OG1RF_RS02035	OG1RF_10376	HMPREF9498_00339	LysR family transcriptional regulator	0	2	#DIV/0!	3.59209e-07	#DIV/0!	-
A0A125WAB5	OG1RF_RS12675	OG1RF_12484	HMPREF9498_00007	hypothetical protein	0	2	#DIV/0!	4.16563e-07	#DIV/0!	-
A0A125W235	OG1RF_RS05520	OG1RF_11064	truB	tRNA pseudouridine(55) synthase TruB	0	2	#DIV/0!	4.69548e-07	#DIV/0!	-
A0A125W921	OG1RF_RS08365	OG1RF_11631	HMPREF9498_00290	hydroxymethylpyrimidine/phosphomethylpyrimidine kinase	0	2	#DIV/0!	3.72994e-07	#DIV/0!	-
A0A125W5U7	OG1RF_RS07380	OG1RF_11433	HMPREF9498_01667	RluA family pseudouridine synthase	0	2	#DIV/0!	3.19062e-06	#DIV/0!	-
A0A125W746	OG1RF_RS00565	OG1RF_10113	HMPREF9498_01165	ATP-binding protein	0	2	#DIV/0!	1.19628e-06	#DIV/0!	-
A0A125W703	OG1RF_RS01230	OG1RF_10218	HMPREF9498_01271	alpha/beta hydrolase	0	3	#DIV/0!	1.10917e-07	#DIV/0!	-
A0A125W7X1	OG1RF_RS11280	OG1RF_12200	HMPREF9498_00957	ferredoxin--NADP(+) reductase	0	3	#DIV/0!	1.03202e-06	#DIV/0!	-
A0A125W3W5	OG1RF_RS08530	OG1RF_11664	cydD	thiol reductant ABC exporter subunit CydD	0	3	#DIV/0!	2.17671e-07	#DIV/0!	-
A0A125W195	OG1RF_RS06590	OG1RF_11274	HMPREF9498_03109	hypothetical protein	0	3	#DIV/0!	7.24606e-06	#DIV/0!	-
A0A125W534	OG1RF_RS02325	OG1RF_10436	HMPREF9498_01860	acetyltransferase	0	3	#DIV/0!	2.49817e-06	#DIV/0!	-
A0A125W834	OG1RF_RS04635	OG1RF_10886	HMPREF9498_00910	(Fe-S)-binding protein	0	3	#DIV/0!	6.15422e-06	#DIV/0!	-
A0A125W3E0	OG1RF_RS12650	OG1RF_12477	HMPREF9498_02574	PTS mannose/fructose/sorbose transporter subunit IIB	0	3	#DIV/0!	1.11076e-06	#DIV/0!	-
A0A125W6M4	OG1RF_RS10855	OG1RF_12122	HMPREF9498_01340	signal peptidase II	0	3	#DIV/0!	4.78324e-06	#DIV/0!	-
A0A125W6N4	OG1RF_RS10735	OG1RF_12099	xth	exodeoxyribonuclease III	0	3	#DIV/0!	1.38396e-06	#DIV/0!	-
A0A125W7N0	OG1RF_RS00325	OG1RF_10064	HMPREF9498_01114	hypothetical protein	0	3	#DIV/0!	7.56419e-07	#DIV/0!	-
A0A125WAM3	OG1RF_RS12740	OG1RF_12498	birA	biotin--[acetyl-CoA-carboxylase] ligase	0	3	#DIV/0!	2.36904e-06	#DIV/0!	-
A0A125W5T1	OG1RF_RS07730	OG1RF_11505	HMPREF9498_01741	DUF2188 domain-containing protein	0	3	#DIV/0!	4.46307e-07	#DIV/0!	-
A0A125WAH7	OG1RF_RS03525	OG1RF_10679	HMPREF9498_00171	hypothetical protein	0	3	#DIV/0!	1.56021e-06	#DIV/0!	-
A0A125W612	OG1RF_RS10515	OG1RF_12056	HMPREF9498_01755	hypothetical protein	0	3	#DIV/0!	7.04164e-07	#DIV/0!	-
A0A125W2A6	OG1RF_RS09210	OG1RF_11799	HMPREF9498_02965	hydrolase	0	3	#DIV/0!	8.44148e-07	#DIV/0!	-
A0A125W230	OG1RF_RS05575	OG1RF_11075	HMPREF9498_03303	coproporphyrinogen III oxidase	0	3	#DIV/0!	7.80889e-07	#DIV/0!	-
A0A125W5X7	OG1RF_RS10525	OG1RF_12058	HMPREF9498_01757	SMC family ATPase	0	3	#DIV/0!	1.00139e-06	#DIV/0!	-
A0A125W8T3	OG1RF_RS00970	OG1RF_10194	HMPREF9498_00639	NAD-dependent protein deacetylase	0	3	#DIV/0!	1.63312e-06	#DIV/0!	-
A0A125W1S2	OG1RF_RS05700	OG1RF_11098	HMPREF9498_03278	2-hydroxyglutaryl-CoA dehydratase	0	3	#DIV/0!	3.93969e-07	#DIV/0!	-
A0A125W3C5	OG1RF_RS10115	OG1RF_11977	HMPREF9498_02778	transcription antiterminator BglG	0	3	#DIV/0!	1.35495e-06	#DIV/0!	-
A0A125W5L4	OG1RF_RS03990	OG1RF_10772	HMPREF9498_01793	Cof-type HAD-IIB family hydrolase	0	3	#DIV/0!	6.85377e-06	#DIV/0!	-
A0A125W153	OG1RF_RS06790	OG1RF_11314	HMPREF9498_03071	catalase	0	4	#DIV/0!	2.43333e-06	#DIV/0!	-
A0A125W1S6	OG1RF_RS06190	OG1RF_11194	uvrC	excinuclease ABC subunit UvrC	0	4	#DIV/0!	1.87609e-07	#DIV/0!	-
A0A125WA69	OG1RF_RS03655	OG1RF_10706	psiE	phosphate-starvation-inducible protein PsiE	0	4	#DIV/0!	2.12428e-07	#DIV/0!	-
A0A125W8S1	OG1RF_RS05490	OG1RF_11058	HMPREF9498_00690	hypothetical protein	0	4	#DIV/0!	2.71689e-06	#DIV/0!	-
A0A125W7B4	OG1RF_RS00525	OG1RF_10105	HMPREF9498_01157	ArsR family transcriptional regulator	0	4	#DIV/0!	1.24949e-06	#DIV/0!	-
A0A125W5S1	OG1RF_RS07280	OG1RF_11413	HMPREF9498_01646	DUF523 domain-containing protein	0	4	#DIV/0!	4.29407e-06	#DIV/0!	-
A0A125W1V5	OG1RF_RS05490	OG1RF_11058	HMPREF9498_03321	hypothetical protein	0	4	#DIV/0!	7.51475e-07	#DIV/0!	-
A0A125W4W8	OG1RF_RS12835	OG1RF_12517	folK	2-amino-4-hydroxy-6- hydroxymethyldihydropteridine diphosphokinase	0	4	#DIV/0!	7.31316e-07	#DIV/0!	-
A0A125W579	OG1RF_RS02355	OG1RF_10442	HMPREF9498_01886	hypothetical protein	0	4	#DIV/0!	7.67343e-07	#DIV/0!	-
A0A125W5W5	OG1RF_RS07125	OG1RF_11381	HMPREF9498_01614	ring-cleaving dioxygenase	0	4	#DIV/0!	5.63114e-06	#DIV/0!	-
A0A125W7P3	OG1RF_RS05035	OG1RF_10966	HMPREF9498_00826	cell wall metabolism sensor histidine kinase WalK	0	4	#DIV/0!	4.41475e-06	#DIV/0!	-
A0A125W7X7	OG1RF_RS04700	OG1RF_10899	murI	glutamate racemase	0	4	#DIV/0!	4.0198e-06	#DIV/0!	-
A0A125W904	OG1RF_RS08415	OG1RF_11641	HMPREF9498_00280	replication-associated recombination protein A	0	4	#DIV/0!	1.48168e-06	#DIV/0!	-
A0A125W1V3	OG1RF_RS05605	OG1RF_11082	HMPREF9498_03297	serine/threonine protein phosphatase	0	4	#DIV/0!	1.21339e-06	#DIV/0!	-
A0A125W610	OG1RF_RS07370	OG1RF_11431	HMPREF9498_01664	uracil transporter	0	4	#DIV/0!	1.83407e-05	#DIV/0!	-
A0A125W282	OG1RF_RS05495	OG1RF_11059	HMPREF9498_03320	phage tail family protein	0	4	#DIV/0!	2.16635e-06	#DIV/0!	-
A0A125W2J7	OG1RF_RS10195	OG1RF_11993	smpB	SsrA-binding protein	0	4	#DIV/0!	5.99915e-06	#DIV/0!	-
A0A125W255	OG1RF_RS09050	OG1RF_11768	trpS	tryptophan--tRNA ligase	1	4	1.79922e-07	1.62903e-05	6.50049	1.28338
A0A125W8C8	OG1RF_RS11630	OG1RF_12271	coaP	coenzyme A persulfide reductase	4	4	9.5387e-06	0.000659677	6.11182	3.0104
A0A125W611	OG1RF_RS07350	OG1RF_11427	carB	carbamoyl-phosphate synthase large subunit	4	4	1.84228e-05	0.00067975	5.20544	1.69245
A0A125W105	OG1RF_RS07045	OG1RF_11365	rnhB	ribonuclease HII	1	4	8.40689e-08	3.0487e-06	5.18048	2.42004
A0A125W6A1	OG1RF_RS07375	OG1RF_11432	pyrR	bifunctional pyrimidine operon transcriptional regulator/uracil phosphoribosyltransferase	4	4	3.40093e-05	0.000784506	4.52778	1.79717
A0A125W5Z9	OG1RF_RS07355	OG1RF_11428	carA	carbamoyl-phosphate synthase small subunit	4	4	7.88083e-06	0.000152589	4.27516	1.8032
A0A125W9S8	OG1RF_RS12735	OG1RF_12496	HMPREF9498_00020	DNA-binding protein	2	4	5.63934e-07	1.01078e-05	4.1638	5.39161
A0A125W7C8	OG1RF_RS00595	OG1RF_10118	HMPREF9498_01182	class I SAM-dependent methyltransferase	3	4	1.44435e-06	2.55536e-05	4.14503	5.1893
A0A125W2C3	OG1RF_RS10475	OG1RF_12048	trpS	tryptophan--tRNA ligase	1	4	4.12491e-07	7.25259e-06	4.13606	1.62633
A0A125W1R5	OG1RF_RS06230	OG1RF_11202	HMPREF9498_03182	NAD(P)/FAD-dependent oxidoreductase	4	4	2.37382e-06	3.38269e-05	3.83289	3.28592
A0A125W1H1	OG1RF_RS06685	OG1RF_11294	HMPREF9498_03090	ABC transporter ATP-binding protein	2	4	3.24725e-07	4.31905e-06	3.73342	1.33032
A0A125W2Y6	OG1RF_RS09485	OG1RF_11853	HMPREF9498_02913	homoserine dehydrogenase	1	4	6.63374e-07	8.49611e-06	3.67891	3.12868
A0A125W6E0	OG1RF_RS07510	OG1RF_11459	lgt	prolipoprotein diacylglyceryl transferase	1	3	4.75821e-08	5.99212e-07	3.65458	1.15442
A0A125W9Z0	OG1RF_RS03275	OG1RF_10629	HMPREF9498_00120	phosphomevalonate kinase	1	3	1.78676e-07	2.05664e-06	3.52487	1.0432
A0A125W808	OG1RF_RS05375	OG1RF_11034	HMPREF9498_00668	class I SAM-dependent rRNA methyltransferase	2	3	5.92845e-07	6.53956e-06	3.46347	1.00356
A0A125W7B0	OG1RF_RS00455	OG1RF_10091	HMPREF9498_01143	hypothetical protein	2	4	3.37431e-07	3.71871e-06	3.46214	0.997521
A0A125W3L3	OG1RF_RS11885	OG1RF_12320	HMPREF9498_02547	MurR/RpiR family transcriptional regulator	1	4	1.39895e-07	1.43256e-06	3.35618	2.1007
A0A125W367	OG1RF_RS12470	OG1RF_12440	cinA	damage-inducible protein A	4	4	4.70349e-07	4.7426e-06	3.33388	2.83721
A0A125W9Z6	OG1RF_RS03175	OG1RF_10608	coaE	dephospho-CoA kinase	4	4	2.09444e-06	2.06071e-05	3.29851	5.61567
A0A125W3B8	OG1RF_RS12110	OG1RF_12363	HMPREF9498_02686	Cof-type HAD-IIB family hydrolase	1	4	3.02297e-07	2.9547e-06	3.28897	2.29664
A0A125W5E5	OG1RF_RS07345	OG1RF_11426	pyrK	dihydroorotate dehydrogenase	4	4	3.75336e-05	0.000354539	3.23969	1.53667
A0A125W879	OG1RF_RS04915	OG1RF_10943	HMPREF9498_00853	YajQ family cyclic di-GMP-binding protein	1	4	2.29714e-07	2.16395e-06	3.23576	1.70781
A0A125W683	OG1RF_RS07325	OG1RF_11422	cah	carbonate dehydratase	1	4	4.10892e-06	3.80758e-05	3.21204	2.35787
A0A125W3K5	OG1RF_RS12125	OG1RF_12366	HMPREF9498_02683	oligopeptide ABC transporter substrate-binding protein	4	4	1.14325e-06	1.02442e-05	3.16359	5.50584
A0A125W5F5	OG1RF_RS02630	OG1RF_10497	uvrB	excinuclease ABC subunit UvrB	2	4	2.58483e-07	2.30294e-06	3.15533	0.922872
A0A125WA48	OG1RF_RS03455	OG1RF_10665	HMPREF9498_00156	ABC transporter ATP-binding protein	3	4	1.83883e-06	1.63223e-05	3.14999	0.469244
A0A125W4A7	OG1RF_RS02810	OG1RF_10534	leuS	leucine--tRNA ligase	4	4	8.22428e-05	0.000715656	3.1213	2.48147
A0A125W134	OG1RF_RS06875	OG1RF_11331	parE	DNA topoisomerase IV subunit B	1	4	6.16276e-07	5.23521e-06	3.0866	2.44006
A0A125W5S3	OG1RF_RS07330	OG1RF_11423	pyrE	orotate phosphoribosyltransferase	4	4	9.96382e-05	0.000846033	3.08594	1.99618
A0A125W2A9	OG1RF_RS09250	OG1RF_11808	dinG	DNA polymerase III subunit epsilon	3	4	6.61104e-07	5.47481e-06	3.04986	2.60958
A0A125W9W9	OG1RF_RS03445	OG1RF_10663	ksgA	ribosomal RNA small subunit methyltransferase A	4	4	2.73344e-06	2.09812e-05	2.94031	1.65697
A0A125W2L3	OG1RF_RS09595	OG1RF_11875	HMPREF9498_02890	acyl-CoA thioesterase	4	4	6.2797e-06	4.77283e-05	2.92608	6.14269
A0A125W7S0	OG1RF_RS00255	OG1RF_10050	ispE	4-diphosphocytidyl-2C-methyl-D-erythritol kinase	2	4	3.01203e-07	2.28108e-06	2.92091	2.98238
A0A125W7M8	OG1RF_RS00070	OG1RF_10012	dnaB	replicative DNA helicase	1	3	5.09911e-08	3.78231e-07	2.89095	1.05044
A0A125W8D4	OG1RF_RS05030	OG1RF_10965	HMPREF9498_00827	DNA-binding response regulator	3	4	3.58966e-06	2.6434e-05	2.88048	3.26037
A0A125W2N2	OG1RF_RS10435	OG1RF_12040	nadK	NAD(+) kinase	2	4	5.6269e-07	3.88321e-06	2.78684	1.7638
A0A125W9Z9	OG1RF_RS03120	OG1RF_10597	HMPREF9498_00088	glyoxalase	1	3	1.38611e-08	9.52707e-08	2.78099	0.607735
A0A125W5P4	OG1RF_RS02480	OG1RF_10467	HMPREF9498_01911	thioredoxin	1	4	5.29901e-07	3.62479e-06	2.7741	2.5189
A0A125WAK3	OG1RF_RS11495	OG1RF_12244	rbsK	ribokinase	3	4	1.08666e-06	7.15471e-06	2.719	1.38479
A0A125W2U4	OG1RF_RS10230	OG1RF_11999	cadA	heavy metal translocating P-type ATPase	4	4	2.36772e-05	0.000154935	2.71009	4.61936
A0A125WAL3	OG1RF_RS03680	OG1RF_10711	nusB	N utilization substance protein B	4	4	8.28709e-05	0.00054099	2.70666	0.465316
A0A125W1N7	OG1RF_RS06020	OG1RF_11160	HMPREF9498_03224	CBS domain-containing protein	2	4	1.14879e-06	7.27039e-06	2.66191	2.182
A0A125W2K6	OG1RF_RS09475	OG1RF_11851	thrB	homoserine kinase	4	4	1.37439e-05	8.61541e-05	2.64813	1.43944
A0A125W238	OG1RF_RS05705	OG1RF_11099	HMPREF9498_03277	GntR family transcriptional regulator	1	4	1.57416e-06	9.8512e-06	2.64571	2.22462
A0A125W457	OG1RF_RS08595	OG1RF_11676	prs	ribose-phosphate pyrophosphokinase 1	3	4	5.6044e-06	3.49043e-05	2.63877	1.91187
A0A125W2K4	OG1RF_RS10225	OG1RF_11998	HMPREF9498_02757	hypothetical protein	4	4	4.44022e-06	2.7149e-05	2.6122	2.59559
A0A125W3U3	OG1RF_RS08745	OG1RF_11704	miaA	tRNA (adenosine(37)-N6)-dimethylallyltransferase MiaA	1	3	3.5809e-07	2.16293e-06	2.59459	1.15696
A0A125W8H7	OG1RF_RS05300	OG1RF_11019	FbpA	DUF814 domain-containing protein	1	3	1.68992e-07	9.98894e-07	2.56338	0.935056
A0A125W4I7	OG1RF_RS01435	OG1RF_10258	HMPREF9498_02151	cysteine desulfurase	4	4	1.65864e-06	9.54968e-06	2.52545	3.31922
A0A125W1A6	OG1RF_RS07025	OG1RF_11361	trmFO	FADH(2)-oxidizing methylenetetrahydrofolate--tRNA-(uracil(54)-C(5))- methyltransferase TrmFO	4	4	2.58865e-05	0.000148639	2.52154	2.66631
A0A125W344	OG1RF_RS09910	OG1RF_11936	tdk	thymidine kinase	3	4	8.38731e-07	4.75121e-06	2.50202	2.54195
A0A125W696	OG1RF_RS10950	OG1RF_12140	dnaX	DNA polymerase III subunit gamma/tau	2	4	6.0273e-07	3.32223e-06	2.46257	1.5722
A0A125W9Q0	OG1RF_RS08400	OG1RF_11638	prmA	50S ribosomal protein L11 methyltransferase	3	4	1.28806e-05	7.08057e-05	2.45867	3.32889
A0A125WA60	OG1RF_RS03240	OG1RF_10621	HMPREF9498_00112	glutamate ABC transporter permease	1	3	1.21035e-07	6.6439e-07	2.4566	1.06722
A0A125W825	OG1RF_RS05480	OG1RF_11056	HMPREF9498_00688	hypothetical protein	3	4	3.23015e-06	1.75645e-05	2.44299	3.88589
A0A125W5Y7	OG1RF_RS07340	OG1RF_11425	pyrDB	dihydroorotate dehydrogenase	4	4	8.34246e-05	0.000453381	2.44218	2.22105
A0A125W9L2	OG1RF_RS11195	OG1RF_12188	fabH	3-oxoacyl-ACP synthase III	4	4	6.92446e-06	3.58575e-05	2.3725	2.57791
A0A125WAC2	OG1RF_RS03715	OG1RF_10718	recN	DNA repair protein RecN	1	4	1.09085e-06	5.52725e-06	2.34111	1.47364
A0A125W6B3	OG1RF_RS07365	OG1RF_11430	pyrB	aspartate carbamoyltransferase	4	4	0.000294403	0.00147714	2.32694	2.2845
A0A125WA93	OG1RF_RS03755	OG1RF_10725	mraY	phospho-N-acetylmuramoyl-pentapeptide- transferase	1	3	7.13417e-08	3.56396e-07	2.32067	1.02259
A0A125W1R3	OG1RF_RS06350	OG1RF_11226	HMPREF9498_03157	metal-sulfur cluster assembly factor	1	4	4.98713e-06	2.44702e-05	2.29474	1.88233
A0A125W8Q0	OG1RF_RS05475	OG1RF_11055	HMPREF9498_00687	phage major tail protein, TP901-1 family	3	4	1.142e-05	5.53653e-05	2.27742	2.51097
A0A125WA61	OG1RF_RS03415	OG1RF_10657	metG	methionine--tRNA ligase	4	4	7.56035e-05	0.000365627	2.27385	2.79832
A0A125W6B7	OG1RF_RS04435	OG1RF_10846	HMPREF9498_01516	sugar O-acetyltransferase	1	4	4.45991e-07	2.15444e-06	2.27223	1.51881
A0A125W1M3	OG1RF_RS06605	OG1RF_11277	HMPREF9498_03106	thioesterase	4	4	9.54868e-06	4.58685e-05	2.26413	3.18295
A0A125W1F5	OG1RF_RS06295	OG1RF_11215	atpD	V-type ATP synthase subunit D	1	4	2.49223e-07	1.1971e-06	2.26403	1.53902
A0A125W667	OG1RF_RS10750	OG1RF_12102	HMPREF9498_01362	pyridine nucleotide-disulfide oxidoreductase	4	4	4.61563e-05	0.000220001	2.25291	2.71543
A0A125W5D2	OG1RF_RS02465	OG1RF_10464	HMPREF9498_01908	diacylglycerol kinase	1	2	1.3377e-07	6.30865e-07	2.23757	0.606074
A0A125W6W6	OG1RF_RS01260	OG1RF_10224	HMPREF9498_01277	DUF4809 domain-containing protein	1	4	3.28161e-07	1.53785e-06	2.22844	0.91682
A0A125W5U3	OG1RF_RS07335	OG1RF_11424	pyrF	orotidine-5'-phosphate decarboxylase	4	4	0.000417169	0.0019481	2.22336	2.09689
A0A125W2L9	OG1RF_RS05505	OG1RF_11061	HMPREF9498_03318	hypothetical protein	4	4	1.46378e-05	6.79994e-05	2.21582	2.63212
A0A125W818	OG1RF_RS12995	OG1RF_12538	guaB	IMP dehydrogenase	4	4	0.000276964	0.00126834	2.19517	4.29669
A0A125W333	OG1RF_RS12170	OG1RF_12375	HMPREF9498_02674	Asp23/Gls24 family envelope stress response protein	1	3	6.24814e-06	2.75517e-05	2.14064	0.947717
A0A125W975	OG1RF_RS03165	OG1RF_10606	polA	DNA polymerase I	4	4	9.65553e-05	0.000422963	2.13111	3.02043
A0A125W2R6	OG1RF_RS10285	OG1RF_12010	rex	transcriptional regulator	3	4	4.47043e-06	1.9493e-05	2.12447	3.07792
A0A125W5N9	OG1RF_RS10580	OG1RF_12068	HMPREF9498_01767	NUDIX hydrolase	3	4	8.84676e-07	3.83329e-06	2.11536	2.37393
A0A125W819	OG1RF_RS04645	OG1RF_10888	HMPREF9498_00908	lactate utilization protein C	3	4	6.42055e-07	2.74874e-06	2.098	3.76336
A0A125W620	OG1RF_RS10565	OG1RF_12066	HMPREF9498_01765	hypothetical protein	2	4	1.87447e-06	7.9083e-06	2.07689	1.6797
A0A125W307	OG1RF_RS12335	OG1RF_12408	HMPREF9498_02640	hypothetical protein	1	3	2.88904e-07	1.2069e-06	2.06264	0.945473
A0A125W7Q6	OG1RF_RS00235	OG1RF_10046	HMPREF9498_01094	23S rRNA (guanosine(2251)-2'-O)-methyltransferase RlmB	2	3	3.75315e-06	1.47968e-05	1.97911	0.615905
A0A125WA44	OG1RF_RS08395	OG1RF_11637	HMPREF9498_00284	16S rRNA (uracil(1498)-N(3))-methyltransferase	1	4	9.61134e-08	3.77469e-07	1.97355	1.42593
A0A125W5V4	OG1RF_RS07360	OG1RF_11429	pyrC	dihydroorotase	4	4	0.000970465	0.00373113	1.94286	2.46793
A0A125W2M4	OG1RF_RS09760	OG1RF_11908	HMPREF9498_02855	virion core protein	4	4	8.3225e-06	3.18334e-05	1.93545	3.27385
A0A125W4U8	OG1RF_RS11445	OG1RF_12233	rex	transcriptional regulator	2	4	1.95593e-06	7.34606e-06	1.90912	1.26495
A0A125W8J6	OG1RF_RS05195	OG1RF_10999	HMPREF9498_00792	NADPH-dependent oxidoreductase	4	4	1.57231e-05	5.90394e-05	1.90879	2.40486
A0A125W9M4	OG1RF_RS03000	OG1RF_10572	HMPREF9498_00064	hypothetical protein	4	4	3.25015e-06	1.21658e-05	1.90425	1.10083
A0A125W1X9	OG1RF_RS13460	OG1RF_11152	HMPREF9498_03233	hydroxymethylglutaryl-CoA reductase, degradative	4	4	7.99495e-06	2.95732e-05	1.88713	1.25144
A0A125W5W2	OG1RF_RS07410	OG1RF_11439	rnhA	ribonuclease HI	1	3	1.60624e-07	5.80097e-07	1.85261	0.805238
A0A125W514	OG1RF_RS02230	OG1RF_10416	HMPREF9498_01840	RluA family pseudouridine synthase	1	2	1.37106e-07	4.9496e-07	1.85202	0.497856
A0A125W2D9	OG1RF_RS09465	OG1RF_11849	HMPREF9498_02917	transcriptional repressor	3	4	2.42331e-06	8.73435e-06	1.84972	2.306
A0A125W6T6	OG1RF_RS10820	OG1RF_12115	nrdD	anaerobic ribonucleoside-triphosphate reductase	4	4	1.73107e-05	6.22366e-05	1.8461	1.92381
A0A125W841	OG1RF_RS04665	OG1RF_10892	HMPREF9498_00904	transcriptional regulator	4	4	1.23668e-05	4.36343e-05	1.81899	2.44966
A0A125W706	OG1RF_RS10920	OG1RF_12134	HMPREF9498_01328	transcriptional regulator	4	4	1.66399e-06	5.85581e-06	1.81522	1.46967
A0A125W4B6	OG1RF_RS01550	OG1RF_10281	HMPREF9498_02173	serine protease	4	4	1.33571e-05	4.67454e-05	1.80722	2.76456
A0A125W962; A0A125W2Y6	OG1RF_RS11220	OG1RF_12193		glycosyl transferase family 1	2	4	4.32642e-06	1.50937e-05	1.8027	1.64371
A0A125W2M0	OG1RF_RS10200	OG1RF_11994	rnr	ribonuclease R	4	4	2.93466e-05	0.000101541	1.7908	3.21277
A0A125W1C8	OG1RF_RS06445	OG1RF_11245	fur	transcriptional repressor	2	4	1.30925e-06	4.51951e-06	1.78742	2.11272
A0A125W1F8	OG1RF_RS06785	OG1RF_11313	HMPREF9498_03072	hypothetical protein	4	4	4.68408e-06	1.61663e-05	1.78715	0.908018
A0A125W7U6	OG1RF_RS13170	OG1RF_12573	HMPREF9498_01039	GntR family transcriptional regulator	2	4	3.9494e-05	0.000135967	1.78355	0.72181
A0A125W9X6	OG1RF_RS03075	OG1RF_10587	HMPREF9498_00079	hypothetical protein	3	4	1.14344e-05	3.88662e-05	1.76514	2.12934
A0A125W7E4	OG1RF_RS00360	OG1RF_10071	HMPREF9498_01121	Asp23/Gls24 family envelope stress response protein	4	4	5.99392e-06	2.02877e-05	1.75903	3.21195
A0A125W9N7	OG1RF_RS11050	OG1RF_12159	thrS	threonine--tRNA ligase	4	4	3.12433e-05	0.000105676	1.75803	2.08443
A0A125W1M0	OG1RF_RS06425	OG1RF_11241	dnaG	DNA primase	4	4	3.49128e-07	1.16183e-06	1.73457	1.95506
A0A125WAM2	OG1RF_RS03735	OG1RF_10721	mraZ	division/cell wall cluster transcriptional repressor MraZ	2	4	2.82467e-06	9.21715e-06	1.70624	1.98514
A0A125W1K7	OG1RF_RS06170	OG1RF_11190	HMPREF9498_03194	cell division protein ZapA	3	4	1.14023e-05	3.67938e-05	1.69014	1.74225
A0A125W9W2	OG1RF_RS03395	OG1RF_10653	HMPREF9498_00144	DNA-binding response regulator	4	4	1.53091e-06	4.91909e-06	1.684	1.71736
A0A125W600	OG1RF_RS07530	OG1RF_11463	HMPREF9498_01698	PspC domain-containing protein	3	3	2.23285e-06	7.15952e-06	1.68098	0.938361
A0A125W498	OG1RF_RS01555	OG1RF_10282	HMPREF9498_02174	5-methyltetrahydropteroyltriglutamate-- homocysteine methyltransferase	4	4	3.70504e-05	0.000118497	1.67729	3.54246
A0A125W7P6	OG1RF_RS00275	OG1RF_10054	purR	pur operon repressor	4	4	1.03098e-05	3.27216e-05	1.66624	2.36152
A0A125W9K5	OG1RF_RS02085	OG1RF_10386	HMPREF9498_00329	nitroreductase	4	4	7.45253e-05	0.000236204	1.66423	3.82768
A0A125W3A2	OG1RF_RS10220	OG1RF_11997	HMPREF9498_02758	N-acetyltransferase	4	4	7.00669e-05	0.000220729	1.65547	3.37113
A0A125W3A5	OG1RF_RS12465	OG1RF_12439	recA	DNA recombination/repair protein RecA	4	4	2.09752e-05	6.48152e-05	1.62764	2.6342
A0A125W241	OG1RF_RS09460		rpsU	30S ribosomal protein S21	4	4	2.6958e-06	8.24283e-06	1.61243	2.32783
A0A125W3T4	OG1RF_RS08510	OG1RF_11660	HMPREF9498_02388	NAD(P)/FAD-dependent oxidoreductase	4	4	9.23515e-05	0.000282319	1.61212	3.05715
A0A125W5E1	OG1RF_RS10610	OG1RF_12074	rumA	23S rRNA (uracil(1939)-C(5))-methyltransferase RlmD	4	4	2.27853e-05	6.93431e-05	1.60565	2.47296
A0A125W1U3	OG1RF_RS05525	OG1RF_11065	ribF	riboflavin biosynthesis protein RibF	4	4	2.86727e-06	8.6944e-06	1.60041	1.45188
A0A125W5E4	OG1RF_RS02565	OG1RF_10483	HMPREF9498_01928	rhodanese domain-containing protein	4	4	8.1398e-05	0.000244573	1.5872	3.94011
A0A125WA81	OG1RF_RS03700	OG1RF_10715	HMPREF9498_00206	polyprenyl synthetase family protein	2	4	1.80961e-06	5.43099e-06	1.58553	0.909437
A0A125W2D0	OG1RF_RS10430	OG1RF_12039	HMPREF9498_02714	RluA family pseudouridine synthase	4	4	2.92925e-06	8.68584e-06	1.56814	1.56345
A0A125W9S9	OG1RF_RS08405	OG1RF_11639	HMPREF9498_00282	DUF3013 domain-containing protein	4	4	2.78939e-06	8.19179e-06	1.55423	4.37345
A0A125W2A0	OG1RF_RS09255	OG1RF_11809	HMPREF9498_02955	hypothetical protein	3	4	5.43827e-06	1.59496e-05	1.55231	1.34717
A0A125W8E4	OG1RF_RS01900	OG1RF_10350	HMPREF9498_00707	LytR family transcriptional regulator	4	4	2.69876e-07	7.88623e-07	1.54704	0.715611
A0A125W3S8	OG1RF_RS08525	OG1RF_11663	cydC	thiol reductant ABC exporter subunit CydC	1	3	4.73336e-07	1.38199e-06	1.54581	0.658216
A0A125W4H2	OG1RF_RS02930	OG1RF_10558	HMPREF9498_02230	gfo/Idh/MocA family oxidoreductase	4	4	3.39511e-06	9.90047e-06	1.54404	0.832086
A0A125W192	OG1RF_RS06630	OG1RF_11283	aroC	chorismate synthase	1	3	1.12298e-06	3.25066e-06	1.5334	0.648892
A0A125WAA7	OG1RF_RS03485	OG1RF_10671	HMPREF9498_00162	peptidase M23	4	4	8.621e-07	2.48009e-06	1.52447	2.31072
A0A125W1M5	OG1RF_RS06435	OG1RF_11243	HMPREF9498_03140	hypothetical protein	3	4	3.52138e-06	1.01025e-05	1.52049	1.55531
A0A125W803	OG1RF_RS05295	OG1RF_11018	HMPREF9498_00773	hypothetical protein	2	4	8.14954e-06	2.33563e-05	1.51902	1.44176
A0A125W9W6	OG1RF_RS08255	OG1RF_11608	HMPREF9498_00311	hypothetical protein	1	4	2.52874e-06	7.2043e-06	1.51044	0.492901
A0A125W7Y3	OG1RF_RS04530	OG1RF_10865	HMPREF9498_00937	N-acetyltransferase	2	3	1.90805e-06	5.40757e-06	1.50288	0.813651
A0A125WA98	OG1RF_RS03435	OG1RF_10661	HMPREF9498_00152	TatD family deoxyribonuclease	3	4	3.50537e-06	9.92457e-06	1.50144	1.14472
A0A125W2Q4	OG1RF_RS09620	OG1RF_11879	HMPREF9498_02885	ComE operon protein 2	3	4	5.93743e-06	1.67517e-05	1.4964	1.86517
A0A125W5H0	OG1RF_RS07675	OG1RF_11494	purL	phosphoribosylformylglycinamidine synthase subunit PurL	2	3	1.40512e-05	3.95735e-05	1.49384	0.802869
A0A125W832	OG1RF_RS13085	OG1RF_12556	gidA	tRNA uridine-5-carboxymethylaminomethyl(34) synthesis enzyme MnmG	4	4	5.99517e-05	0.000167973	1.48636	4.14153
A0A125W9Y5	OG1RF_RS03125	OG1RF_10598	queA	tRNA preQ1(34) S-adenosylmethionine ribosyltransferase-isomerase QueA	4	4	0.000148114	0.000414075	1.48319	3.79294
A0A125W2M9	OG1RF_RS09690	OG1RF_11894	HMPREF9498_02871	hypothetical protein	3	4	3.43056e-06	9.58335e-06	1.48209	1.94724
A0A125WA08	OG1RF_RS03170	OG1RF_10607	mutM	DNA-formamidopyrimidine glycosylase	1	3	1.32137e-06	3.69041e-06	1.48174	0.599784
A0A125W4S9	OG1RF_RS02460	OG1RF_10463	gatB	Asp-tRNA(Asn)/Glu-tRNA(Gln) amidotransferase GatCAB subunit B	4	4	0.000392016	0.00109481	1.48169	4.7622
A0A125W605	OG1RF_RS07445	OG1RF_11445	nfo	endonuclease	4	4	1.50666e-05	4.19551e-05	1.4775	2.36006
A0A125W9D3	OG1RF_RS03460	OG1RF_10666	mgsA	methylglyoxal synthase	4	4	6.00985e-06	1.66904e-05	1.47362	1.93473
A0A125WA04	OG1RF_RS08440	OG1RF_11645	HMPREF9498_00275	class I SAM-dependent methyltransferase	4	4	2.51075e-05	6.91443e-05	1.46149	2.24846
A0A125W4Z2	OG1RF_RS12885	OG1RF_12527	HMPREF9498_02128	collagenase-like protease	4	4	4.40484e-05	0.000120666	1.45385	2.47109
A0A125W2H9	OG1RF_RS10240	OG1RF_12001	pncB	nicotinate phosphoribosyltransferase	4	4	0.00012415	0.000339542	1.45151	3.81304
A0A125W236	OG1RF_RS05610	OG1RF_11083	HMPREF9498_03296	RNA-binding transcriptional accessory protein	4	4	5.90741e-05	0.000160185	1.43914	3.70868
A0A125W4E1	OG1RF_RS02910	OG1RF_10554	HMPREF9498_02234	noncanonical pyrimidine nucleotidase, YjjG family	4	4	2.35183e-05	6.35086e-05	1.43317	1.7893
A0A125W5H7	OG1RF_RS02440	OG1RF_10459	ligA	DNA ligase (NAD(+)) LigA	4	4	1.01283e-05	2.6942e-05	1.41146	2.34482
A0A125W3H0	OG1RF_RS08520	OG1RF_11662	HMPREF9498_02386	polyprenyl synthetase family protein	4	4	1.09022e-05	2.89413e-05	1.40851	2.20035
A0A125W3L1	OG1RF_RS08835	OG1RF_11725	HMPREF9498_02466	methyltransferase domain-containing protein	4	4	0.000110345	0.000292726	1.40753	2.95539
A0A125W4J6	OG1RF_RS11435	OG1RF_12231	valS	valine--tRNA ligase	4	4	0.000643236	0.00166529	1.37235	4.97861
A0A125W212	OG1RF_RS09160	OG1RF_11790	lepA	elongation factor 4	3	4	2.56813e-06	6.59347e-06	1.36032	1.38302
A0A125W9X3			lepB		2	3	4.16262e-05	0.000106275	1.35224	0.731257
A0A125W341	OG1RF_RS12120	OG1RF_12365	rnc	ribonuclease 3	4	4	1.70147e-05	4.30672e-05	1.33981	2.67288
A0A125W8T7	OG1RF_RS08215	OG1RF_11601	HMPREF9498_00424	N-acetyltransferase	4	4	1.61536e-06	4.07782e-06	1.33594	2.19192
A0A125W8B6	OG1RF_RS04935	OG1RF_10946	murA	UDP-N-acetylglucosamine 1-carboxyvinyltransferase	4	4	2.55544e-05	6.43005e-05	1.33126	5.48059
A0A125W7H4	OG1RF_RS00495	OG1RF_10099	arcA	arginine deiminase	4	4	0.000177265	0.000445038	1.32802	2.44121
A0A125W6M7	OG1RF_RS10765	OG1RF_12105	HMPREF9498_01359	lipoate--protein ligase A	4	4	0.000567921	0.00142422	1.32641	5.62597
A0A125W5X3	OG1RF_RS07200	OG1RF_11397	HMPREF9498_01630	DegV family protein	4	4	1.96336e-05	4.8994e-05	1.31928	2.38286
A0A125W8B3	OG1RF_RS05040	OG1RF_10967	HMPREF9498_00825	hypothetical protein	3	4	3.52579e-07	8.75398e-07	1.31199	1.05348
A0A125W314	OG1RF_RS10055	OG1RF_11965	HMPREF9498_02790	glutamine amidotransferase	4	4	1.36138e-05	3.37737e-05	1.31083	1.93012
A0A125W1L8	OG1RF_RS06600	OG1RF_11276	cca	CCA-adding enzyme	4	4	8.70906e-06	2.1456e-05	1.30079	2.8623
A0A125W7P0	OG1RF_RS00115	OG1RF_10022	HMPREF9498_01068	DUF956 domain-containing protein	4	4	3.43355e-06	8.43586e-06	1.29683	1.92693
A0A125W246	OG1RF_RS09470	OG1RF_11850	HMPREF9498_02916	phosphotransferase	4	4	1.65924e-06	4.05511e-06	1.28922	2.18647
A0A125WAH0	OG1RF_RS03840	OG1RF_10742	HMPREF9498_00233	ATP-dependent helicase	4	4	1.54535e-05	3.77636e-05	1.28906	4.50463
A0A125W8Q7	OG1RF_RS00975	OG1RF_10195	HMPREF9498_00640	chorismate mutase	4	4	1.61953e-05	3.93983e-05	1.28256	2.08319
A0A125W7W6	OG1RF_RS00075	OG1RF_10013	purA	adenylosuccinate synthetase	4	4	0.000121714	0.000294943	1.27694	3.2849
A0A125W3E6	OG1RF_RS08955	OG1RF_11749	HMPREF9498_02491	hypothetical protein	4	4	2.83928e-05	6.86093e-05	1.27288	3.25431
A0A125W1Y8	OG1RF_RS06710	OG1RF_11299	HMPREF9498_03085	DUF896 domain-containing protein	4	4	2.17247e-06	5.22707e-06	1.26666	2.92098
A0A125W1Z8	OG1RF_RS05960	OG1RF_11149	dhaL	dihydroxyacetone kinase subunit L	4	4	9.70983e-05	0.000233243	1.26432	2.91477
A0A125W9X5	OG1RF_RS03020	OG1RF_10576	cshA	ATP-dependent helicase	4	4	0.000224807	0.000536572	1.25509	2.90955
A0A125W5E3	OG1RF_RS02340	OG1RF_10439	prfC	peptide chain release factor 3	4	4	1.50175e-05	3.53551e-05	1.23528	2.52605
A0A125W7K1	OG1RF_RS13115	OG1RF_12562	HMPREF9498_01028	oxaloacetate decarboxylase	4	4	1.28748e-05	3.02934e-05	1.23446	1.81477
A0A125W213	OG1RF_RS05965	OG1RF_11150	HMPREF9498_03236	hypothetical protein	2	3	1.01464e-06	2.38723e-06	1.23437	0.612189
A0A125W750	OG1RF_RS10670	OG1RF_12086	sdaAA	L-serine ammonia-lyase, iron-sulfur-dependent, subunit alpha	3	4	2.79518e-06	6.57207e-06	1.23341	1.72124
A0A125W485	OG1RF_RS01605	OG1RF_10291	HMPREF9498_02184	Cof-type HAD-IIB family hydrolase	2	4	1.15036e-06	2.68296e-06	1.22174	0.93669
A0A125W8Q8	OG1RF_RS01380	OG1RF_10247	HMPREF9498_00600	ring-cleaving dioxygenase	4	4	2.85366e-05	6.63435e-05	1.21714	4.02447
A0A125W7H8	OG1RF_RS00085	OG1RF_10016	HMPREF9498_01061	ABC-F family ATPase	4	4	0.00019741	0.000458538	1.21585	4.36504
A0A125W2U5	OG1RF_RS10315	OG1RF_12016	HMPREF9498_02739	diacylglycerol kinase	4	4	6.20521e-05	0.000142401	1.1984	2.12937
A0A125W5C0	OG1RF_RS02435	OG1RF_10458	pcrA	DNA helicase PcrA	4	4	3.66584e-06	8.38121e-06	1.19302	1.79688
A0A125W7N2	OG1RF_RS05080	OG1RF_10975	HMPREF9498_00816	Holliday junction resolvase RuvX	4	4	3.27185e-06	7.47543e-06	1.19205	1.20226
A0A125W863	OG1RF_RS01060	OG1RF_10212	lysS	lysine--tRNA ligase	4	4	0.000205522	0.000468595	1.18905	3.03264
A0A125W878	OG1RF_RS05090	OG1RF_10977	HMPREF9498_00814	helix-turn-helix domain-containing protein	4	4	6.79209e-05	0.000154556	1.1862	2.60918
A0A125W9S5	OG1RF_RS08370	OG1RF_11632	aspS	aspartate--tRNA ligase	4	4	0.000487927	0.00110523	1.17961	4.17361
A0A125W6N7	OG1RF_RS10715	OG1RF_12095	HMPREF9498_01369	CBS domain-containing protein	4	4	2.87325e-05	6.50148e-05	1.17809	1.05544
A0A125W5V3			HMPREF9498_01787		1	2	2.62921e-06	5.85212e-06	1.15433	0.317991
A0A125WAB8	OG1RF_RS03775	OG1RF_10729	ftsA	cell division protein FtsA	4	4	0.000188025	0.000417763	1.15176	1.98443
A0A125W2Q6	OG1RF_RS10465	OG1RF_12046	mecA	adapter protein MecA	4	4	3.72615e-05	8.23596e-05	1.14425	1.09373
A0A125W4F9	OG1RF_RS12890	OG1RF_12528	HMPREF9498_02129	U32 family peptidase	4	4	1.63134e-05	3.58424e-05	1.13561	1.40285
A0A125W7U8	OG1RF_RS04850	OG1RF_10929	HMPREF9498_00866	class I SAM-dependent RNA methyltransferase	4	4	4.16365e-05	9.14131e-05	1.13455	2.20271
A0A125W366	OG1RF_RS10410	OG1RF_12035	HMPREF9498_02718	tRNA (uridine(34)/cytosine(34)/5- carboxymethylaminomethyluridine(34)-2'-O)- methyltransferase TrmL	4	4	6.39175e-05	0.00014033	1.13454	2.80001
A0A125WAG7	OG1RF_RS12705	OG1RF_12490	HMPREF9498_00013	gluconate kinase	3	4	3.83553e-06	8.41761e-06	1.13398	1.30022
A0A125W9V5	OG1RF_RS03010	OG1RF_10574	ddl	D-alanine--D-alanine ligase	4	4	0.000234619	0.000511752	1.12513	4.08133
A0A125W2Y7	OG1RF_RS12430	OG1RF_12432	msrB	peptide-methionine (R)-S-oxide reductase	4	4	1.40402e-05	3.04313e-05	1.11599	2.42306
A0A125W427	OG1RF_RS08685	OG1RF_11692	glmS	glutamine--fructose-6-phosphate transaminase (isomerizing)	4	4	0.00113318	0.00244721	1.11076	3.99306
A0A125W574	OG1RF_RS02425	OG1RF_10456	HMPREF9498_01900	DeoR/GlpR transcriptional regulator	4	4	3.99065e-05	8.61028e-05	1.10944	0.827372
A0A125W6S0	OG1RF_RS10755	OG1RF_12103	ahpC	peroxiredoxin	4	4	0.00162971	0.00350091	1.10311	2.32895
A0A125W5A2	OG1RF_RS02455	OG1RF_10462	gatA	Asp-tRNA(Asn)/Glu-tRNA(Gln) amidotransferase GatCAB subunit A	4	4	0.000522895	0.00111951	1.09828	4.15655
A0A125W798	OG1RF_RS00345	OG1RF_10068	HMPREF9498_01118	KR domain-containing protein	4	4	6.43504e-06	1.37592e-05	1.09638	0.933112
A0A125W4I0	OG1RF_RS12820	OG1RF_12514	folP	dihydropteroate synthase	4	4	4.09385e-06	8.7496e-06	1.09576	1.51724
A0A125W2L4	OG1RF_RS09730	OG1RF_11902	argS	arginine--tRNA ligase	4	4	0.000275179	0.000587802	1.09496	4.72009
A0A125W1Z6	OG1RF_RS06660	OG1RF_11289	HMPREF9498_03095	DegV family protein	4	4	8.29929e-06	1.76684e-05	1.09012	2.31109
A0A125W494	OG1RF_RS08550	OG1RF_11668	HMPREF9498_02362	DNA topoisomerase III	4	4	5.60981e-05	0.000119297	1.08854	2.57967
A0A125W3Z1	OG1RF_RS02780	OG1RF_10528	HMPREF9498_02261	rRNA methyltransferase	4	4	2.90143e-06	6.15187e-06	1.08426	1.79571
A0A125W6B0	OG1RF_RS07425	OG1RF_11442	HMPREF9498_01676	ABC transporter ATP-binding protein	4	2	5.03273e-07	1.06688e-06	1.08398	0.343402
A0A125WA20	OG1RF_RS03695	OG1RF_10714	xseB	exodeoxyribonuclease VII small subunit	4	4	6.88799e-06	1.45984e-05	1.08366	0.727805
A0A125W109	OG1RF_RS07050	OG1RF_11366	ylqF	ribosome biogenesis GTPase YlqF	4	4	2.88055e-06	6.09645e-06	1.08163	1.16451
A0A125W585	OG1RF_RS02335	OG1RF_10438	HMPREF9498_01862	HlyC/CorC family transporter	4	4	4.76614e-06	1.00313e-05	1.07361	1.42174
A0A125W7Z0	OG1RF_RS04650	OG1RF_10889	lepB	signal peptidase I	3	3	1.33712e-06	2.80981e-06	1.07134	0.556243
A0A125W7E7	OG1RF_RS00365	OG1RF_10072	HMPREF9498_01122	Asp23/Gls24 family envelope stress response protein	4	4	7.95068e-05	0.000166817	1.06912	3.33413
A0A125W7N5	OG1RF_RS00335	OG1RF_10066	HMPREF9498_01116	Crp/Fnr family transcriptional regulator	4	4	5.76048e-05	0.00012049	1.06466	1.58891
A0A125W487	OG1RF_RS12900	OG1RF_12530	HMPREF9498_02132	ATP-dependent Clp protease ATP-binding subunit	4	4	3.91272e-05	8.17896e-05	1.06375	2.21289
A0A125W8E9	OG1RF_RS05015	OG1RF_10962	HMPREF9498_00831	DUF1836 domain-containing protein	4	4	7.47662e-06	1.56113e-05	1.06213	1.17295
A0A125W1Y3	OG1RF_RS09350	OG1RF_11826	HMPREF9498_02941	SUF system NifU family Fe-S cluster assembly protein	2	4	3.42625e-07	7.13587e-07	1.05846	0.885338
A0A125W1U0	OG1RF_RS05580	OG1RF_11076	hrcA	HrcA family transcriptional regulator	2	4	8.85566e-07	1.84196e-06	1.05657	0.868361
A0A125W7R3	OG1RF_RS00470	OG1RF_10094	sdaAA	L-serine ammonia-lyase, iron-sulfur-dependent, subunit alpha	4	4	5.92099e-05	0.000122979	1.05451	2.78255
A0A125W2R7	OG1RF_RS10295	OG1RF_12012	HMPREF9498_02743	GntR family transcriptional regulator	4	4	1.2895e-06	2.67512e-06	1.05279	2.27461
A0A125W5U0	OG1RF_RS07285	OG1RF_11414	HMPREF9498_01647	DNA-binding response regulator	4	4	5.18128e-07	1.07461e-06	1.05244	2.44622
A0A125W285	OG1RF_RS09490	OG1RF_11854	czrA	ArsR family transcriptional regulator	4	4	3.54998e-06	7.34124e-06	1.04821	2.18501
A0A125W3N2	OG1RF_RS12425	OG1RF_12431	prs	ribose-phosphate pyrophosphokinase	4	4	0.000170291	0.000351784	1.04669	3.1238
A0A125W5L8	OG1RF_RS04045	OG1RF_10783	HMPREF9498_01804	DNA-binding response regulator	4	4	0.000114936	0.000236575	1.04147	2.89639
A0A125W7U3	OG1RF_RS00020	OG1RF_10002	dnaN	DNA polymerase III subunit beta	4	4	0.000413085	0.000841873	1.02716	2.88927
A0A125W2D4	OG1RF_RS09235	OG1RF_11805	asnS	asparagine--tRNA ligase	4	4	0.000767962	0.00154783	1.01114	4.87204
A0A125W3D9	OG1RF_RS08910	OG1RF_11740	map	type I methionyl aminopeptidase	4	4	0.000247299	0.000498403	1.01105	3.66408
A0A125W784	OG1RF_RS00920	OG1RF_10183	ecfA	energy-coupling factor transporter ATPase	3	3	2.37864e-06	4.78194e-06	1.00746	0.473958
A0A125W8C3	OG1RF_RS04670	OG1RF_10893	pheS	phenylalanine--tRNA ligase subunit alpha	4	4	4.37085e-05	8.78684e-05	1.00743	3.05354
A0A125W3D7	OG1RF_RS08840	OG1RF_11726	HMPREF9498_02467	ABC transporter ATP-binding protein	4	4	1.18427e-05	2.37966e-05	1.00676	1.65681
A0A125W8N0	OG1RF_RS05370	OG1RF_11033	HMPREF9498_00667	LTA synthase family protein	4	4	2.47167e-05	4.93475e-05	0.997488	1.2448
A0A125W3Q2	OG1RF_RS08830	OG1RF_11724	HMPREF9498_02465	glycosyltransferase family 2 protein	3	4	1.56101e-06	3.1033e-06	0.99132	1.0014
A0A125W7E7; A0A125W7E4	OG1RF_RS04380	OG1RF_10835		ABC transporter ATP-binding protein	4	4	1.60261e-05	3.18203e-05	0.989522	3.05993
A0A125W899	OG1RF_RS04760	OG1RF_10911	dapD	2,3,4,5-tetrahydropyridine-2,6-dicarboxylate N-acetyltransferase	4	4	5.03635e-05	9.99804e-05	0.989266	2.32076
A0A125W7U5	OG1RF_RS04705	OG1RF_10900	rph	ribonuclease PH	4	4	2.17935e-05	4.32129e-05	0.987565	2.33653
A0A125W2A1	OG1RF_RS09355	OG1RF_11827	sufS	cysteine desulfurase	4	4	1.45001e-05	2.87351e-05	0.986755	2.12392
A0A125W1A7	OG1RF_RS06565	OG1RF_11269	hup	HU family DNA-binding protein	4	4	0.000656376	0.00129783	0.983509	2.96496
A0A125W3H5	OG1RF_RS12225	OG1RF_12386	sun	16S rRNA (cytosine(967)-C(5))-methyltransferase RsmB	3	4	2.01963e-06	3.99185e-06	0.98297	0.685191
A0A125W9W3	OG1RF_RS02010	OG1RF_10372	pgpA	phosphatidylglycerophosphatase A	4	4	6.11487e-06	1.20402e-05	0.977471	2.00584
A0A125WA32	OG1RF_RS03265	OG1RF_10627	HMPREF9498_00118	bifunctional acetaldehyde-CoA/alcohol dehydrogenase	4	4	0.00268534	0.00528283	0.976206	3.68883
A0A125W4H7	OG1RF_RS08780	OG1RF_11712	tagD	glycerol-3-phosphate cytidylyltransferase	4	4	4.37738e-05	8.53221e-05	0.962851	1.65002
A0A125W453	OG1RF_RS08895	OG1RF_11737	HMPREF9498_02478	glycosyltransferase family 2 protein	3	4	3.35494e-06	6.53595e-06	0.962109	1.14824
A0A125W162	OG1RF_RS06745	OG1RF_11306	HMPREF9498_03078	NUDIX domain-containing protein	4	4	1.62133e-06	3.15707e-06	0.961405	3.73085
A0A125W209	OG1RF_RS05690	OG1RF_11096	HMPREF9498_03280	hypothetical protein	4	4	3.07096e-05	5.97026e-05	0.959104	1.43166
A0A125W4A3	OG1RF_RS08680	OG1RF_11691	HMPREF9498_02336	aminoacyltransferase	4	4	8.57151e-06	1.64802e-05	0.943109	1.06474
A0A125W8C7	OG1RF_RS05075	OG1RF_10974	HMPREF9498_00817	IreB family regulatory phosphoprotein	4	4	4.31842e-05	8.24166e-05	0.93243	1.73865
A0A125W7F1	OG1RF_RS00015	OG1RF_10001	dnaA	chromosomal replication initiator protein DnaA	2	3	1.48e-06	2.81935e-06	0.929762	0.45328
A0A125W767	OG1RF_RS00825	OG1RF_10164	rpsN	30S ribosomal protein S14 type Z	4	4	8.27008e-06	1.57318e-05	0.92771	0.428902
A0A125W2J0	OG1RF_RS09825	OG1RF_11920	HMPREF9498_02841	hypothetical protein	4	4	2.05128e-05	3.90052e-05	0.927139	0.80109
A0A125W3T7	OG1RF_RS02870	OG1RF_10546	HMPREF9498_02243	GntR family transcriptional regulator	1	2	1.58505e-06	3.01078e-06	0.925607	0.23605
A0A125W634	OG1RF_RS07515	OG1RF_11460	hprK	HPr kinase/phosphorylase	4	4	9.37585e-05	0.000177789	0.923145	1.81192
A0A125W854	OG1RF_RS04550	OG1RF_10869	HMPREF9498_00932	VWA domain-containing protein	2	3	9.78541e-07	1.85206e-06	0.92043	0.457785
A0A125W7X4	OG1RF_RS04845	OG1RF_10928	gpsB	cell division regulator GpsB	4	4	0.000144223	0.000272714	0.91909	1.99273
A0A125W2K7	OG1RF_RS10140	OG1RF_11983	murA	UDP-N-acetylglucosamine 1-carboxyvinyltransferase	4	4	0.000305068	0.000576017	0.91698	1.71845
A0A125W9Q7	OG1RF_RS08375	OG1RF_11633	hisS	histidine--tRNA ligase	4	4	2.82456e-05	5.32543e-05	0.914874	4.09428
A0A125W2J9	OG1RF_RS05600	OG1RF_11080	dnaJ	molecular chaperone DnaJ	4	4	8.02338e-05	0.00015118	0.913985	2.40455
A0A125W2U8	OG1RF_RS12100	OG1RF_12361	HMPREF9498_02688	cupin	3	4	9.69928e-06	1.80769e-05	0.898195	0.595712
A0A125W6E7	OG1RF_RS10965	OG1RF_12143	HMPREF9498_01473	DUF3042 domain-containing protein	3	4	4.74294e-06	8.8337e-06	0.897235	1.22622
A0A125W2X9	OG1RF_RS10205	OG1RF_11995	HMPREF9498_02760	carboxylesterase	4	4	1.51731e-06	2.82248e-06	0.895443	1.71431
A0A125W3X0	OG1RF_RS08950	OG1RF_11748	HMPREF9498_02490	PhzF family phenazine biosynthesis protein	3	4	3.42455e-06	6.35328e-06	0.891589	0.968057
A0A125W5X2	OG1RF_RS07460	OG1RF_11449	tyrS	Tyrosine--tRNA ligase 2	4	4	0.000571454	0.0010589	0.889854	3.2856
A0A125W315	OG1RF_RS12155	OG1RF_12372	plsX	phosphate acyltransferase PlsX	4	4	1.0673e-05	1.97721e-05	0.889503	1.95658
A0A125W1E1	OG1RF_RS07005	OG1RF_11357	codY	GTP-sensing pleiotropic transcriptional regulator CodY	4	4	2.12663e-05	3.93469e-05	0.887684	1.32078
A0A125W393	OG1RF_RS12250	OG1RF_12391	gmk	guanylate kinase	4	4	3.87246e-05	7.15678e-05	0.886059	2.27271
A0A125W8R3	OG1RF_RS05350	OG1RF_11029	HMPREF9498_00663	DNA-binding response regulator	4	4	2.97998e-05	5.50539e-05	0.885544	1.26005
A0A125W1T9	OG1RF_RS05585	OG1RF_11077	grpE	nucleotide exchange factor GrpE	4	4	0.000694022	0.001282	0.885346	2.86295
A0A125W6U6	OG1RF_RS10740	OG1RF_12100	HMPREF9498_01364	exonuclease	4	4	3.04666e-06	5.62574e-06	0.884812	0.729662
A0A125W478	OG1RF_RS02920	OG1RF_10556	udk	uridine kinase	4	4	3.76938e-05	6.94714e-05	0.882092	4.19477
A0A125W586	OG1RF_RS02525	OG1RF_10475	HMPREF9498_01920	deoxynucleoside kinase	4	4	3.5022e-05	6.44499e-05	0.879915	1.83146
A0A125W287; A0A125W8K2	OG1RF_RS01810	OG1RF_10332		isochorismate synthase	3	4	3.0761e-06	5.64316e-06	0.875401	0.900176
A0A125W3C1	OG1RF_RS08970	OG1RF_11752	HMPREF9498_02494	nucleoid-associated protein	3	4	1.26339e-06	2.31552e-06	0.874034	0.5566
A0A125W371	OG1RF_RS11805	OG1RF_12305	HMPREF9498_02567	serine protease	4	4	1.34441e-05	2.46389e-05	0.873959	2.27344
A0A125W6Z2	OG1RF_RS00735	OG1RF_10146	fusA	elongation factor G	4	4	0.00895279	0.0163753	0.87111	5.78036
A0A125W416	OG1RF_RS08790	OG1RF_11714	HMPREF9498_02311	glycosyltransferase family 2 protein	4	4	5.28814e-06	9.66671e-06	0.870265	1.05778
A0A125W1A5	OG1RF_RS07030	OG1RF_11362	topA	type I DNA topoisomerase	4	4	0.00012605	0.000230325	0.869676	3.37212
A0A125W5C4	OG1RF_RS02670	OG1RF_10505	clpP	ATP-dependent Clp protease proteolytic subunit	4	4	0.000286041	0.00052119	0.86559	3.10549
A0A125W2E7	OG1RF_RS05920	OG1RF_11141	pdhA	pyruvate dehydrogenase (acetyl-transferring) E1 component subunit alpha	4	4	0.000553268	0.00100776	0.865102	3.05514
A0A125W550	OG1RF_RS02645	OG1RF_10500	HMPREF9498_01945	RNase adaptor protein RapZ	4	4	8.92707e-06	1.62573e-05	0.864828	1.43063
A0A125W725	OG1RF_RS01330	OG1RF_10237	HMPREF9498_01291	dihydrofolate reductase	4	4	6.66057e-06	1.21227e-05	0.863992	1.30977
A0A125WAA9	OG1RF_RS03670	OG1RF_10709	HMPREF9498_00199	hypothetical protein	4	4	8.42275e-06	1.53232e-05	0.863353	2.41666
A0A125W9M2	OG1RF_RS11040	OG1RF_12157	rpmG	50S ribosomal protein L33	3	4	2.94479e-05	5.3468e-05	0.86051	0.602689
A0A125W288	OG1RF_RS09375	OG1RF_11831	pyrH	UMP kinase	4	4	0.000179012	0.000325027	0.860499	1.79424
A0A125W5D7	OG1RF_RS02290	OG1RF_10429	trmB	tRNA (guanosine(46)-N7)-methyltransferase TrmB	4	4	1.49615e-05	2.71641e-05	0.860444	1.23065
A0A125WA72	OG1RF_RS03675	OG1RF_10710	HMPREF9498_00201	Asp23/Gls24 family envelope stress response protein	4	4	8.64177e-05	0.000156203	0.854029	3.76831
A0A125W2I4	OG1RF_RS09430	OG1RF_11842	era	GTPase Era	4	4	8.62811e-06	1.55617e-05	0.850884	0.919161
A0A125W9X1	OG1RF_RS03180	OG1RF_10609	nrdR	transcriptional regulator NrdR	4	4	5.38742e-05	9.64237e-05	0.839793	1.83487
A0A125W173	OG1RF_RS06730	OG1RF_11303	cysK	cysteine synthase A	4	4	0.000157861	0.000282435	0.83926	1.54015
A0A125W9M5	OG1RF_RS01980	OG1RF_10366	tyrS	Tyrosine--tRNA ligase 1	4	4	0.00374092	0.00665322	0.83066	3.05186
A0A125W602	OG1RF_RS07590	OG1RF_11477	raiA	ribosomal subunit interface protein	4	4	5.38355e-05	9.57447e-05	0.830636	0.68553
A0A125WAE6	OG1RF_RS03685	OG1RF_10712	folD	bifunctional methylenetetrahydrofolate dehydrogenase/methenyltetrahydrofolate cyclohydrolase	4	4	0.000154839	0.00027428	0.824886	3.1072
A0A125WAE0	OG1RF_RS03820	OG1RF_10738	HMPREF9498_00229	metal-dependent transcriptional regulator	4	4	2.95429e-05	5.22732e-05	0.823261	2.17744
A0A125W7V0	OG1RF_RS04825	OG1RF_10924	pyrG	CTP synthetase	4	4	0.000143027	0.000253025	0.822996	2.64471
A0A125W1K9	OG1RF_RS06045	OG1RF_11165	cshB	ATP-dependent helicase	4	4	2.03243e-05	3.59423e-05	0.822475	0.842884
A0A125W523	OG1RF_RS03925	OG1RF_10759	HMPREF9498_01781	phosphotransferase	4	4	4.05804e-06	7.17317e-06	0.821829	0.539849
A0A125W3B6	OG1RF_RS08925	OG1RF_11743	HMPREF9498_02484	TetR/AcrR family transcriptional regulator	4	4	8.96854e-06	1.58204e-05	0.818844	0.917789
A0A125W5F9	OG1RF_RS03910	OG1RF_10756	HMPREF9498_01778	antibiotic biosynthesis monooxygenase	3	4	1.26937e-05	2.23567e-05	0.816591	1.1337
A0A125W5T0	OG1RF_RS10570	OG1RF_12067	HMPREF9498_01766	toxic anion resistance protein	4	4	0.000184708	0.000325279	0.816434	2.01856
A0A125W657	OG1RF_RS10800	OG1RF_12112	dltA	D-alanine--poly(phosphoribitol) ligase subunit 1	4	4	0.000137895	0.000242133	0.812228	1.84701
A0A125W9B0	OG1RF_RS11075	OG1RF_12164	HMPREF9498_00471	hypothetical protein	4	4	5.07504e-06	8.88111e-06	0.807321	0.539249
A0A125W210; A0A125W5B5	OG1RF_RS09175	OG1RF_11793		chaperone protein ClpB	4	4	2.52915e-05	4.41365e-05	0.803319	2.14872
A0A125W9A5	OG1RF_RS11155	OG1RF_12180	accC	acetyl-CoA carboxylase biotin carboxylase subunit	4	4	0.000212463	0.000369863	0.799781	2.66042
A0A125W6I4	OG1RF_RS11030	OG1RF_12156	HMPREF9498_01460	hypothetical protein	4	4	2.18232e-05	3.77614e-05	0.791055	1.66478
A0A125W5X6	OG1RF_RS07220	OG1RF_11401	recJ	single-stranded-DNA-specific exonuclease RecJ	4	4	1.00783e-05	1.74263e-05	0.790011	1.09755
A0A125WAP3	OG1RF_RS03835	OG1RF_10741	HMPREF9498_00232	gfo/Idh/MocA family oxidoreductase	4	4	0.000111131	0.000192092	0.78954	3.87567
A0A125W627	OG1RF_RS07500	OG1RF_11457	galU	UTP--glucose-1-phosphate uridylyltransferase	4	4	0.000125101	0.000215991	0.787883	2.65258
A0A125W2Q2	OG1RF_RS10050	OG1RF_11964	HMPREF9498_02791	DUF1727 domain-containing protein	4	4	4.6983e-06	8.11086e-06	0.787716	1.35822
A0A125W8M0	OG1RF_RS05410	OG1RF_11042	HMPREF9498_00676	50S ribosomal protein L7ae	4	4	4.88522e-06	8.4178e-06	0.785019	0.337798
A0A125W8L0	OG1RF_RS01840	OG1RF_10338	HMPREF9498_00719	organic hydroperoxide resistance protein	4	4	0.000360999	0.000621182	0.783022	3.61467
A0A125W2G3	OG1RF_RS09830	OG1RF_11921	HMPREF9498_02840	FtsW/RodA/SpoVE family cell cycle protein	1	2	4.03537e-07	6.92871e-07	0.779886	0.189011
A0A125W2E1	OG1RF_RS09455	OG1RF_11847	HMPREF9498_02919	GatB/YqeY domain-containing protein	4	4	7.76184e-05	0.00013327	0.779884	0.957839
A0A125W3G9	OG1RF_RS11930	OG1RF_12329	HMPREF9498_02538	low molecular weight phosphotyrosine protein phosphatase	4	3	1.6214e-06	2.78248e-06	0.779132	0.481324
A0A125W7E0	OG1RF_RS00750	OG1RF_10149	HMPREF9498_01211	class I SAM-dependent methyltransferase	4	4	2.97882e-06	5.10599e-06	0.777451	1.29875
A0A125W981	OG1RF_RS11150	OG1RF_12179	accD	acetyl-CoA carboxylase carboxyltransferase subunit beta	4	4	1.78394e-05	3.05497e-05	0.776087	1.2598
A0A125W374	OG1RF_RS12435	OG1RF_12433	maf	maf-like protein	2	3	2.9975e-06	5.12635e-06	0.774173	0.346157
A0A125W3C0	OG1RF_RS12230	OG1RF_12387	fmt	methionyl-tRNA formyltransferase	4	4	0.000215058	0.000367283	0.772166	4.00158
A0A125W9K9	OG1RF_RS08070	OG1RF_11573	murC	UDP-N-acetylmuramate--L-alanine ligase	4	4	0.000231146	0.000392768	0.764873	2.59954
A0A125W5Y5	OG1RF_RS07270	OG1RF_11411	ffh	signal recognition particle protein	4	4	9.56165e-05	0.000161473	0.755962	2.10294
A0A125W1W4	OG1RF_RS05995	OG1RF_11155	HMPREF9498_03230	cold-shock protein	4	4	5.25429e-05	8.82933e-05	0.748807	0.717936
A0A125W7J4	OG1RF_RS00040	OG1RF_10006	gyrA	DNA gyrase subunit A	4	4	0.000574329	0.000964936	0.748556	2.18464
A0A125W759	OG1RF_RS00910	OG1RF_10181	HMPREF9498_01244	amidohydrolase	4	4	5.71445e-05	9.59871e-05	0.748225	5.65618
A0A125W6C2	OG1RF_RS10970	OG1RF_12144	HMPREF9498_01472	oxidoreductase	4	4	6.36365e-06	1.06702e-05	0.745664	1.48669
A0A125W2B3	OG1RF_RS09360	OG1RF_11828	sufD	Fe-S cluster assembly protein SufD	4	4	0.000200723	0.000334366	0.736226	2.59855
A0A125W856	OG1RF_RS11290	OG1RF_12201	pdxB	2-hydroxyacid dehydrogenase	4	4	4.74893e-05	7.90062e-05	0.734363	2.06193
A0A125W436	OG1RF_RS02805	OG1RF_10533	HMPREF9498_02256	LysM peptidoglycan-binding domain-containing protein	3	3	7.9103e-06	1.31492e-05	0.733171	0.450322
A0A125WAB7	OG1RF_RS03810	OG1RF_10736	ileS	isoleucine--tRNA ligase	4	4	0.00300673	0.004993	0.731709	5.10882
A0A125W709	OG1RF_RS01275	OG1RF_10227	fabN	beta-hydroxyacyl-ACP dehydratase	4	4	0.000177706	0.000294407	0.728319	3.20749
A0A125W691	OG1RF_RS07265	OG1RF_11410	HMPREF9498_01643	MerR family transcriptional regulator	4	4	3.79888e-06	6.28218e-06	0.725689	1.49385
A0A125W7V6	OG1RF_RS00065	OG1RF_10011	rplI	50S ribosomal protein L9	4	4	1.51157e-05	2.49862e-05	0.72508	1.70581
A0A125W9H1	OG1RF_RS08185	OG1RF_11596	HMPREF9498_00422	hypothetical protein	3	4	1.47569e-06	2.4317e-06	0.720574	0.568654
A0A125W987	OG1RF_RS11780	OG1RF_12301	HMPREF9498_00550	DinB family protein	4	4	9.394e-06	1.54717e-05	0.719815	0.495105
A0A125W5W3	OG1RF_RS07240	OG1RF_11405	HMPREF9498_01638	hypothetical protein	4	4	5.459e-05	8.93083e-05	0.710156	1.55723
A0A125W224	OG1RF_RS09245	OG1RF_11807	HMPREF9498_02957	peptidase	4	4	3.52148e-06	5.72855e-06	0.701987	0.684751
A0A125W2Y0	OG1RF_RS12460	OG1RF_12438	rny	ribonuclease Y	4	4	1.08289e-05	1.76072e-05	0.701277	0.611665
A0A125W3E8	OG1RF_RS08485	OG1RF_11655	rlmN	23S rRNA (adenine(2503)-C(2))-methyltransferase RlmN	4	4	4.92398e-06	7.97596e-06	0.695834	1.53626
A0A125W316	OG1RF_RS09885	OG1RF_11931	upp	uracil phosphoribosyltransferase	4	4	0.000631028	0.00102168	0.695165	3.59615
A0A125W4Q7	OG1RF_RS02800	OG1RF_10532	HMPREF9498_02257	DUF1700 domain-containing protein	4	4	9.85649e-07	1.59573e-06	0.695069	1.25636
A0A125W594	OG1RF_RS11450	OG1RF_12234	thiI	tRNA 4-thiouridine(8) synthase ThiI	4	4	0.000115669	0.000186978	0.692866	2.35741
A0A125W327	OG1RF_RS12115	OG1RF_12364	smc	chromosome segregation protein SMC	3	4	1.02348e-06	1.64958e-06	0.688617	0.485179
A0A125W5F2	OG1RF_RS10535	OG1RF_12060	HMPREF9498_01759	1-acyl-sn-glycerol-3-phosphate acyltransferase	1	2	4.62261e-07	7.43394e-07	0.685418	0.168368
A0A125W716	OG1RF_RS10865	OG1RF_12124	HMPREF9498_01338	hypothetical protein	4	4	0.000135215	0.000217326	0.684609	1.05321
A0A125W7K4	OG1RF_RS00590	OG1RF_10117	HMPREF9498_01181	esterase	4	4	3.15589e-05	5.06105e-05	0.681391	5.10173
A0A125W5B5	OG1RF_RS02365	OG1RF_10444	clpE	ATP-dependent Clp protease ATP-binding subunit	4	4	0.000270019	0.000432152	0.678477	3.04443
A0A125W1H8	OG1RF_RS06200	OG1RF_11196	HMPREF9498_03188	ABC transporter ATP-binding protein	4	4	7.24478e-06	1.15787e-05	0.676459	0.945027
A0A125W7M3	OG1RF_RS12065	OG1RF_12355	HMPREF9498_00988	DUF1694 domain-containing protein	4	4	5.33401e-06	8.52158e-06	0.675902	0.753998
A0A125W1F2	OG1RF_RS06280	OG1RF_11212	HMPREF9498_03171	V-type ATP synthase subunit F	4	4	6.79661e-06	1.08519e-05	0.675062	1.16297
A0A125W9K6	OG1RF_RS11135	OG1RF_12176	yqeH	ribosome biogenesis GTPase YqeH	4	4	1.98679e-05	3.16305e-05	0.670875	0.980865
A0A125W1M4	OG1RF_RS06000	OG1RF_11156	HMPREF9498_03229	hypothetical protein	4	4	1.85804e-05	2.95597e-05	0.669846	1.25584
A0A125W7A2	OG1RF_RS12990	OG1RF_12537	serS	serine--tRNA ligase	4	4	0.00174927	0.00278151	0.669116	4.51905
A0A125W2W4	OG1RF_RS12445	OG1RF_12435	mutS	DNA mismatch repair protein MutS	4	4	4.44617e-06	7.06877e-06	0.668895	1.34851
A0A125W6G3	OG1RF_RS11010	OG1RF_12152	HMPREF9498_01464	DUF805 domain-containing protein	3	4	3.5557e-06	5.64676e-06	0.66729	0.795904
A0A125W350	OG1RF_RS12440	OG1RF_12434	mutL	DNA mismatch repair endonuclease MutL	4	4	2.28232e-06	3.62394e-06	0.667058	1.00596
A0A125W323	OG1RF_RS12105	OG1RF_12362	ftsY	signal recognition particle-docking protein FtsY	4	4	9.15684e-06	1.4536e-05	0.666707	0.734681
A0A125W9G4	OG1RF_RS08110	OG1RF_11581	clpX	ATP-dependent Clp protease ATP-binding subunit ClpX	4	4	0.000346907	0.000548296	0.660406	2.87861
A0A125W1E3	OG1RF_RS07010	OG1RF_11358	hslU	HslU--HslV peptidase ATPase subunit	4	4	0.000532368	0.000838622	0.655598	3.7932
A0A125W7T2; A0A125W7A2	OG1RF_RS12990	OG1RF_12537		serine--tRNA ligase	4	4	0.000613458	0.000963403	0.651175	3.50521
A0A125WAF6	OG1RF_RS03740	OG1RF_10722	mraW	16S rRNA (cytosine(1402)-N(4))-methyltransferase RsmH	2	3	6.91809e-07	1.08442e-06	0.648476	0.273005
A0A125W2M6	OG1RF_RS10040	OG1RF_11963	HMPREF9498_02792	transcriptional regulator	4	4	4.76326e-05	7.46409e-05	0.648017	2.05908
A0A125WA33	OG1RF_RS03475	OG1RF_10669	HMPREF9498_00160	ABC transporter ATP-binding protein	2	2	3.76679e-07	5.8827e-07	0.643142	0.207842
A0A125W8M9	OG1RF_RS05020	OG1RF_10963	HMPREF9498_00830	DegV family protein	4	4	0.000138233	0.000215501	0.640586	1.39292
A0A125W7G8	OG1RF_RS00035	OG1RF_10005	gyrB	DNA topoisomerase (ATP-hydrolyzing) subunit B	4	4	1.37231e-05	2.12445e-05	0.630486	0.459075
A0A125W5R1	OG1RF_RS07230	OG1RF_11403	HMPREF9498_01636	NAD(P)-dependent oxidoreductase	3	3	1.37831e-05	2.12993e-05	0.627911	0.30646
A0A125W1R4	OG1RF_RS05675	OG1RF_11095	HMPREF9498_03283	DUF2969 domain-containing protein	4	4	7.58491e-05	0.000117146	0.62711	2.68524
A0A125W1F3	OG1RF_RS06780	OG1RF_11312	HMPREF9498_03073	DNA mismatch repair protein MutT	4	4	4.66158e-06	7.18638e-06	0.624446	0.586529
A0A125W7Q2	OG1RF_RS04990	OG1RF_10957	rnj	RNase J family beta-CASP ribonuclease	4	4	0.000204322	0.000314024	0.620031	3.08144
A0A125W6Q8	OG1RF_RS04425	OG1RF_10844	HMPREF9498_01514	GAF domain-containing protein	4	4	1.01252e-05	1.55594e-05	0.619844	0.698751
A0A125W965	OG1RF_RS03115	OG1RF_10595	proV	glycine/betaine ABC transporter ATP-binding protein	4	4	0.000109372	0.000168031	0.619476	1.60112
A0A125W8K3	OG1RF_RS01805	OG1RF_10331	menE	o-succinylbenzoate--CoA ligase	4	4	8.61901e-06	1.31992e-05	0.614857	0.704474
A0A125W7A0	OG1RF_RS00580	OG1RF_10115	guaA	GMP synthase (glutamine-hydrolyzing)	4	4	0.0031558	0.0048309	0.614288	4.29259
A0A125W5L3	OG1RF_RS04030	OG1RF_10780	HMPREF9498_01801	hypothetical protein	4	4	7.63064e-05	0.000116673	0.61259	3.79183
A0A125W9B5	OG1RF_RS08180	OG1RF_11595	HMPREF9498_00421	hypothetical protein	4	4	8.19422e-05	0.000125227	0.611867	4.51604
A0A125W777	OG1RF_RS00875	OG1RF_10174	rpmJ	50S ribosomal protein L36	4	4	3.66961e-05	5.6018e-05	0.610265	0.331098
A0A125W7H7	OG1RF_RS00885	OG1RF_10176	rpsK	30S ribosomal protein S11	4	4	0.000835144	0.0012695	0.604159	1.73195
A0A125W7W4	OG1RF_RS11400	OG1RF_12224	rnj	ribonuclease J	4	4	0.000283794	0.000430927	0.6026	3.92019
A0A125W1Z0	OG1RF_RS05930	OG1RF_11143	HMPREF9498_03243	dihydrolipoyllysine-residue acetyltransferase	4	4	0.00112344	0.00170526	0.602066	3.60067
A0A125W4M6	OG1RF_RS01415	OG1RF_10254	HMPREF9498_02147	haloacid dehalogenase	3	4	1.76316e-05	2.67614e-05	0.601995	0.698255
A0A125W277	OG1RF_RS09535	OG1RF_11863	HMPREF9498_02902	MBL fold metallo-hydrolase	4	4	5.49983e-05	8.34685e-05	0.601844	1.19051
A0A125W1G5	OG1RF_RS06725	OG1RF_11302	HMPREF9498_03082	N-acetylmuramoyl-L-alanine amidase	2	2	1.39601e-06	2.11352e-06	0.598338	0.187203
A0A125W7G2	OG1RF_RS13180	OG1RF_12575	HMPREF9498_01041	protein jag	4	4	0.000109163	0.000165029	0.596235	2.6898
A0A125W208	OG1RF_RS05670	OG1RF_11094	HMPREF9498_03284	flotillin family protein	4	4	8.26851e-05	0.000124778	0.593666	0.770691
A0A125W210	OG1RF_RS09175	OG1RF_11793	clpB	chaperone protein ClpB	4	4	5.71894e-05	8.61847e-05	0.591683	1.30378
A0A125W947	OG1RF_RS03015	OG1RF_10575	murF	UDP-N-acetylmuramoyl-tripeptide--D-alanyl-D- alanine ligase	4	4	0.000133847	0.000201694	0.591577	4.51866
A0A125W2C0	OG1RF_RS06015	OG1RF_11159	HMPREF9498_03225	metal-dependent hydrolase	4	4	3.38145e-05	5.08874e-05	0.589667	0.970317
A0A125W7R7	OG1RF_RS04855	OG1RF_10930	HMPREF9498_00865	carboxypeptidase M32	4	4	0.000371088	0.000556812	0.585429	2.03988
A0A125W9M1	OG1RF_RS11145	OG1RF_12178	accA	acetyl-CoA carboxylase carboxyl transferase subunit alpha	4	4	1.82185e-05	2.73057e-05	0.583799	0.899683
A0A125W724	OG1RF_RS00280	OG1RF_10055	glmU	bifunctional UDP-N-acetylglucosamine diphosphorylase/glucosamine-1-phosphate N-acetyltransferase GlmU	4	4	0.00040253	0.000602402	0.581629	1.26397
A0A125W815	OG1RF_RS04765	OG1RF_10912	HMPREF9498_00884	N-acetyldiaminopimelate deacetylase	4	4	7.63835e-06	1.1427e-05	0.581114	2.04147
A0A125W7U2	OG1RF_RS13045	OG1RF_12547	HMPREF9498_01012	oleate hydratase	4	4	1.7476e-05	2.61339e-05	0.580545	0.791595
A0A125W1L4	OG1RF_RS05990	OG1RF_11154	HMPREF9498_03231	YdcF family protein	3	4	3.35362e-06	5.01126e-06	0.579456	0.383173
A0A125W7E3	OG1RF_RS00740	OG1RF_10147	tuf	elongation factor Tu	4	4	0.0350062	0.0522902	0.57893	3.93773
A0A125W939	OG1RF_RS11080	OG1RF_12165	HMPREF9498_00469	aminoglycoside 6-adenylyltransferase	2	3	1.43496e-06	2.14229e-06	0.578146	0.265629
A0A125W7Y0	OG1RF_RS04675	OG1RF_10894	pheT	phenylalanine--tRNA ligase subunit beta	4	4	5.64666e-05	8.42493e-05	0.577266	1.84023
A0A125W1Q8	OG1RF_RS05925	OG1RF_11142	HMPREF9498_03244	alpha-ketoacid dehydrogenase subunit beta	4	4	0.000914437	0.00136225	0.575039	3.45457
A0A125W389	OG1RF_RS12260	OG1RF_12393	HMPREF9498_02656	hypothetical protein	4	4	0.00025363	0.000376856	0.571286	2.22213
A0A125W204	OG1RF_RS09370	OG1RF_11830	frr	ribosome-recycling factor	4	4	0.00160324	0.00237807	0.568803	1.23358
A0A125W2T4	OG1RF_RS10405	OG1RF_12034	HMPREF9498_02719	histidine phosphatase family protein	4	4	2.57232e-05	3.80697e-05	0.565572	0.879939
A0A125W807	OG1RF_RS04780	OG1RF_10915	HMPREF9498_00881	aldo/keto reductase	4	4	0.000270254	0.000399668	0.564486	3.81355
A0A125W2N6	OG1RF_RS09640	OG1RF_11884	HMPREF9498_02881	16S rRNA (guanine(966)-N(2))-methyltransferase RsmD	3	4	5.41863e-07	8.00956e-07	0.563795	0.315438
A0A125W4M7	OG1RF_RS02260	OG1RF_10423	prsA	foldase	4	4	0.00011139	0.0001646	0.563344	0.590719
A0A125W2M7	OG1RF_RS10470	OG1RF_12047	spxA	transcriptional regulator Spx	4	4	0.000456502	0.000673056	0.560105	1.86236
A0A125W7V2	OG1RF_RS13090	OG1RF_12557	trmE	tRNA uridine-5-carboxymethylaminomethyl(34) synthesis GTPase MnmE	4	4	2.51876e-05	3.71046e-05	0.558888	1.16188
A0A125WAN7	OG1RF_RS12715	OG1RF_12492	rpoC	DNA-directed RNA polymerase subunit beta'	4	4	0.00233522	0.00343875	0.558328	3.31415
A0A125W4D0	OG1RF_RS01425	OG1RF_10256	HMPREF9498_02149	HAD family phosphatase	4	4	4.56482e-06	6.70204e-06	0.554042	2.01134
A0A125W5F6	OG1RF_RS02650	OG1RF_10501	HMPREF9498_01946	YvcK family protein	3	3	2.61649e-06	3.83636e-06	0.552106	0.316528
A0A125W5Q2	OG1RF_RS07135	OG1RF_11383	HMPREF9498_01616	NADP-dependent oxidoreductase	4	4	5.76875e-05	8.41369e-05	0.54448	0.695269
A0A125W8K0	OG1RF_RS01890	OG1RF_10348	sodA	superoxide dismutase [Fe]	4	4	0.00113263	0.0016415	0.535332	1.0536
A0A125W3R1	OG1RF_RS02140	OG1RF_10397	HMPREF9498_02365	ring-cleaving dioxygenase	4	4	0.000255534	0.00036958	0.53237	0.869206
A0A125W3A9	OG1RF_RS12245	OG1RF_12390	rpoZ	DNA-directed RNA polymerase subunit omega	4	4	5.81619e-05	8.41196e-05	0.532367	1.43669
A0A125W5J5	OG1RF_RS07540	OG1RF_11465	phoU	phosphate transport system regulatory protein PhoU	4	4	7.41444e-05	0.000107141	0.531096	1.32249
A0A125W811	OG1RF_RS04815	OG1RF_10922	HMPREF9498_00874	DUF1934 domain-containing protein	4	4	3.62849e-05	5.22187e-05	0.5252	0.8586
A0A125W187	OG1RF_RS06645	OG1RF_11286	aroK	shikimate kinase	4	4	2.28857e-06	3.28864e-06	0.523044	0.869418
A0A125W3N4	OG1RF_RS02160	OG1RF_10401	HMPREF9498_02370	rRNA pseudouridine synthase	3	3	1.25616e-06	1.80456e-06	0.522627	0.19943
A0A125W7Q9	OG1RF_RS00210	OG1RF_10041	ispF	2-C-methyl-D-erythritol 2,4-cyclodiphosphate synthase	1	2	9.20295e-07	1.31953e-06	0.51986	0.0923971
A0A125W1G1	OG1RF_RS06860	OG1RF_11328	pflA	pyruvate formate lyase-activating protein	4	4	0.00100732	0.00144308	0.518634	3.33229
A0A125W5Z0	OG1RF_RS07480	OG1RF_11453	ccpA	catabolite control protein A	4	4	0.000247354	0.000353699	0.515945	2.33849
A0A125W797	OG1RF_RS00890	OG1RF_10177	rpoA	DNA-directed RNA polymerase subunit alpha	4	4	0.000733374	0.00104865	0.515906	2.73915
A0A125W872	OG1RF_RS11380	OG1RF_12220	HMPREF9498_00976	ABC transporter ATP-binding protein	3	4	2.4511e-06	3.46274e-06	0.498488	0.433418
A0A125WA18	OG1RF_RS03305	OG1RF_10635	HMPREF9498_00126	DUF3899 domain-containing protein	3	4	1.09809e-06	1.55029e-06	0.497548	0.476551
A0A125W525	OG1RF_RS11440	OG1RF_12232	HMPREF9498_02035	thiol peroxidase	4	4	0.000149043	0.000210083	0.49523	2.9396
A0A125W1X8	OG1RF_RS06055	OG1RF_11167	alaS	alanine--tRNA ligase	4	4	0.000312693	0.000438665	0.488373	1.31683
A0A125W9I8	OG1RF_RS08210	OG1RF_11600	HMPREF9498_00423	hypothetical protein	4	4	3.93967e-05	5.523e-05	0.487375	0.66032
A0A125W6Z1	OG1RF_RS01265	OG1RF_10225	fabI	enoyl-[acyl-carrier-protein] reductase FabI	4	4	0.000335724	0.000469541	0.483978	1.71794
A0A125W7Z2	OG1RF_RS01655	OG1RF_10301	HMPREF9498_00754	RND transporter	4	4	1.22431e-05	1.7097e-05	0.481774	0.51999
A0A125W1Y5	OG1RF_RS09345	OG1RF_11825	sufB	Fe-S cluster assembly protein SufB	4	4	0.000570034	0.000793345	0.476901	3.09316
A0A125W785	OG1RF_RS00925	OG1RF_10184	ecfT	energy-coupling factor transporter transmembrane protein EcfT	2	4	1.67234e-06	2.32645e-06	0.476258	0.223331
A0A125W969	OG1RF_RS11200	OG1RF_12189	HMPREF9498_00445	MarR family transcriptional regulator	4	4	2.26915e-05	3.15174e-05	0.473996	2.73921
A0A125W5M9	OG1RF_RS03975	OG1RF_10769	ndk	nucleoside-diphosphate kinase	4	4	4.76002e-05	6.61015e-05	0.473715	1.31424
A0A125WAS6	OG1RF_RS12720	OG1RF_12493	rpoB	DNA-directed RNA polymerase subunit beta	4	4	0.00152838	0.00212071	0.472544	3.05401
A0A125W408	OG1RF_RS02730	OG1RF_10517	metK	S-adenosylmethionine synthase	4	4	0.000598697	0.000830527	0.472202	3.7201
A0A125W799	OG1RF_RS01250	OG1RF_10222	HMPREF9498_01275	HD domain-containing protein	3	3	2.60014e-06	3.60423e-06	0.471102	0.24501
A0A125W8C4	OG1RF_RS04660	OG1RF_10891	addA	helicase-exonuclease AddAB subunit AddA	4	4	4.37312e-05	6.05992e-05	0.470637	1.09522
A0A125W8E6	OG1RF_RS04985	OG1RF_10956	dapA	4-hydroxy-tetrahydrodipicolinate synthase	4	4	6.21302e-05	8.59473e-05	0.468156	1.00983
A0A125W116	OG1RF_RS06990	OG1RF_11354	HMPREF9498_03031	ABC transporter substrate-binding protein	4	4	1.79178e-05	2.47761e-05	0.467553	0.744045
A0A125W3R3	OG1RF_RS08880	OG1RF_11734	rfbA	glucose-1-phosphate thymidylyltransferase	4	4	7.56653e-05	0.000104396	0.464356	1.70941
A0A125W820	OG1RF_RS05420	OG1RF_11044	rbfA	ribosome-binding factor A	4	4	0.000200214	0.000275538	0.460706	0.971631
A0A125W8M7	OG1RF_RS01045	OG1RF_10209	hflB	ATP-dependent zinc metalloprotease FtsH	4	4	0.000326384	0.000448565	0.458747	0.568979
A0A125W519	OG1RF_RS01535	OG1RF_10278	HMPREF9498_02170	N-acyl-D-amino-acid deacylase	4	4	1.39019e-05	1.90682e-05	0.455887	0.843394
A0A125W7S6	OG1RF_RS13020	OG1RF_12543	HMPREF9498_01008	chromosome partitioning protein ParB	4	4	6.08277e-06	8.32907e-06	0.453427	0.851298
A0A125W9P6	OG1RF_RS08430	OG1RF_11643	HMPREF9498_00277	universal stress protein	4	4	7.53633e-05	0.000103178	0.453195	4.30031
A0A125W991	OG1RF_RS11100	OG1RF_12169	HMPREF9498_00465	YebC/PmpR family DNA-binding transcriptional regulator	4	4	0.000552744	0.00075612	0.452004	1.52055
A0A125W2I3	OG1RF_RS09735	OG1RF_11903	tsaD	tRNA (adenosine(37)-N6)-threonylcarbamoyltransferase complex transferase subunit TsaD	4	4	3.83046e-05	5.22885e-05	0.448975	2.43095
A0A125W1Q6	OG1RF_RS06285	OG1RF_11213	atpA	V-type ATP synthase subunit A	4	4	0.000721462	0.000983357	0.446793	1.64715
A0A125WAD4	OG1RF_RS03440	OG1RF_10662	rnmV	ribonuclease M5	4	4	4.66678e-06	6.34454e-06	0.44309	2.39862
A0A125W7Y1	OG1RF_RS11335	OG1RF_12210	HMPREF9498_00967	TrkA family potassium uptake protein	4	4	6.28413e-05	8.47796e-05	0.432005	0.834126
A0A125WA87	OG1RF_RS03780	OG1RF_10730	ftsZ	cell division protein FtsZ	4	4	0.00114589	0.00154577	0.43185	1.69673
A0A125W9J0	OG1RF_RS03765	OG1RF_10727	murG	undecaprenyldiphospho-muramoylpentapeptide beta-N-acetylglucosaminyltransferase	4	4	1.02011e-05	1.37446e-05	0.430133	1.46722
A0A125W996	OG1RF_RS11160	OG1RF_12181	fabZ	beta-hydroxyacyl-ACP dehydratase	4	4	6.38267e-05	8.59611e-05	0.429523	0.606105
A0A125W1Z3	OG1RF_RS06060	OG1RF_11168	HMPREF9498_03216	tRNA (adenine(22)-N(1))-methyltransferase TrmK	4	3	1.82921e-06	2.4612e-06	0.428139	0.297113
A0A125W7B1	OG1RF_RS04790	OG1RF_10917	HMPREF9498_00879	lactoylglutathione lyase	4	4	0.000363158	0.000488616	0.428103	3.73703
A0A125W2Y5	OG1RF_RS10060	OG1RF_11966	HMPREF9498_02789	inosine-uridine preferring nucleoside hydrolase	4	4	5.35922e-05	7.20454e-05	0.426883	0.747859
A0A125W1L3	OG1RF_RS06485	OG1RF_11253	HMPREF9498_03130	peptidyl-prolyl cis-trans isomerase	4	4	1.05082e-05	1.40595e-05	0.420026	0.928552
A0A125W2V4	OG1RF_RS10170	OG1RF_11989	atpH	ATP synthase subunit delta	4	4	1.33626e-05	1.77706e-05	0.411287	0.406525
A0A125W2Q5	OG1RF_RS09905	OG1RF_11935	prfA	peptide chain release factor 1	4	4	0.000132647	0.000176368	0.410998	1.78416
A0A125W163	OG1RF_RS06740	OG1RF_11305	nox	NADH oxidase	4	4	0.00398605	0.0052947	0.409588	1.87719
A0A125W440	OG1RF_RS02900	OG1RF_10552	rplY	50S ribosomal protein L25	4	4	0.000260325	0.000345635	0.408937	1.13788
A0A125W1F7	OG1RF_RS06290	OG1RF_11214	atpB	ATP synthase subunit beta	4	4	0.000595657	0.000790426	0.408149	1.50876
A0A125W734	OG1RF_RS01295	OG1RF_10230	efp	elongation factor P	4	4	0.000862859	0.00114154	0.403785	1.57209
A0A125W625	OG1RF_RS07535	OG1RF_11464	HMPREF9498_01699	hypothetical protein	4	4	0.000334791	0.000442747	0.403222	0.540791	DapR resistance
A0A125W900	OG1RF_RS05395	OG1RF_11038	rimP	ribosome maturation factor	4	4	6.83444e-05	9.02601e-05	0.401264	0.929615
A0A125WA83	OG1RF_RS03335	OG1RF_10641	infC	translation initiation factor IF-3	4	4	4.62468e-05	6.10326e-05	0.400227	1.04747
A0A125W6G6	OG1RF_RS00720	OG1RF_10143	rpiA	ribose-5-phosphate isomerase	4	4	0.000218699	0.000288549	0.399872	1.95797
A0A125W377	OG1RF_RS11810	OG1RF_12306	HMPREF9498_02566	DUF4479 domain-containing protein	4	4	0.0001899	0.0002495	0.3938	0.615525
A0A125W7S1	OG1RF_RS11300	OG1RF_12203	HMPREF9498_00960	ABC transporter substrate-binding protein	4	4	0.000260846	0.000342075	0.391114	0.876993
A0A125W2P1	OG1RF_RS09365	OG1RF_11829	sufC	Fe-S cluster assembly ATPase SufC	4	4	0.000194201	0.000254264	0.388775	2.26009
A0A125W4K5	OG1RF_RS01470	OG1RF_10266	HMPREF9498_02158	deaminase	4	4	0.000184865	0.000242003	0.388555	0.931084
A0A125W7G6	OG1RF_RS00845	OG1RF_10168	rpsE	30S ribosomal protein S5	4	4	0.0051816	0.00677323	0.386446	1.48019
A0A125WA01	OG1RF_RS03300	OG1RF_10634	HMPREF9498_00125	peptide ABC transporter substrate-binding protein	4	4	7.5923e-05	9.90304e-05	0.383334	0.668892
A0A125W2D1	OG1RF_RS09660	OG1RF_11888	pyc	pyruvate carboxylase	4	4	0.000947494	0.00123408	0.381247	2.36653
A0A125W2A7	OG1RF_RS09750	OG1RF_11906	yeaZ	tRNA (adenosine(37)-N6)-threonylcarbamoyltransferase complex dimerization subunit type 1 TsaB	4	4	2.59256e-05	3.37044e-05	0.378557	0.552419
A0A125W8Z9	OG1RF_RS05400	OG1RF_11040	nusA	transcription termination/antitermination protein NusA	4	4	0.000154593	0.00020076	0.376994	1.60527
A0A125W1D0	OG1RF_RS06430	OG1RF_11242	rpoD	RNA polymerase sigma factor SigA	4	4	0.000402257	0.000521542	0.374668	1.62797
A0A125W5E8	OG1RF_RS04020	OG1RF_10778	pfkA	ATP-dependent 6-phosphofructokinase	4	4	0.00453888	0.00588227	0.374036	1.58909
A0A125W340	OG1RF_RS12560	OG1RF_12459	HMPREF9498_02592	cysteine hydrolase	4	4	4.74899e-05	6.15267e-05	0.37359	0.975369
A0A125W319	OG1RF_RS12165	OG1RF_12374	HMPREF9498_02675	hypothetical protein	4	4	0.00073717	0.000954785	0.373178	1.71167
A0A125W510	OG1RF_RS04035	OG1RF_10781	rpmF	50S ribosomal protein L32	4	4	1.82186e-05	2.3594e-05	0.373009	0.71999
A0A125W3F2	OG1RF_RS08980	OG1RF_11754	HMPREF9498_02497	VOC family protein	4	4	1.54319e-05	1.99745e-05	0.372243	1.00255
A0A125W227	OG1RF_RS06510	OG1RF_11258	scpB	SMC-Scp complex subunit ScpB	4	3	3.68366e-06	4.76512e-06	0.371372	0.254913
A0A125W7K8	OG1RF_RS00055	OG1RF_10009	rpsR	30S ribosomal protein S18	4	4	0.000521642	0.00067452	0.370802	0.466138
A0A125W1I5	OG1RF_RS06625	OG1RF_11282	aroB	3-dehydroquinate synthase	4	4	8.91288e-05	0.000115088	0.368772	1.00735
A0A125W1M6	OG1RF_RS06550	OG1RF_11266	cmk	cytidylate kinase	4	4	0.000140448	0.000181351	0.368747	2.22501
A0A125W3I9	OG1RF_RS08495	OG1RF_11657	HMPREF9498_02391	ABC transporter ATP-binding protein	4	4	8.81104e-06	1.13769e-05	0.368725	0.533684
A0A125W976	OG1RF_RS11215	OG1RF_12192	HMPREF9498_00441	glycosyltransferase family 4 protein	4	4	8.51749e-05	0.000109969	0.368593	1.23217
A0A125W1B7	OG1RF_RS06515	OG1RF_11259	HMPREF9498_03124	rRNA pseudouridine synthase	4	4	0.000172291	0.000222414	0.368404	0.705755
A0A125W583	OG1RF_RS02320	OG1RF_10435	HMPREF9498_01859	DUF402 domain-containing protein	4	4	5.57678e-06	7.19469e-06	0.367502	0.419706
A0A125W5G8	OG1RF_RS02665	OG1RF_10504	HMPREF9498_01949	thioredoxin	4	4	0.00047905	0.00061632	0.363503	0.715026
A0A125W1X1	OG1RF_RS09385	OG1RF_11833	rpsB	30S ribosomal protein S2	4	4	0.00372522	0.00479148	0.363147	1.34002
A0A125W7Z6	OG1RF_RS00250	OG1RF_10049	HMPREF9498_01097	hypothetical protein	4	4	2.39212e-05	3.07226e-05	0.361011	1.80433
A0A125W505	OG1RF_RS01430	OG1RF_10257	ezrA	septation ring formation regulator EzrA	4	4	9.49054e-05	0.00012174	0.359242	0.555071
A0A125W9N2	OG1RF_RS11095	OG1RF_12168	HMPREF9498_00466	hypothetical protein	3	3	5.17313e-07	6.62939e-07	0.357839	0.171043
A0A125W7J8	OG1RF_RS00600	OG1RF_10119	add	adenosine deaminase	4	4	1.49207e-05	1.90507e-05	0.35253	0.435237
A0A125W2U6	OG1RF_RS12490		HMPREF9498_02607	YccF domain-containing protein	3	2	1.23929e-06	1.58155e-06	0.351827	0.121643
A0A125W886	OG1RF_RS04860	OG1RF_10931	HMPREF9498_00864	DNA replication protein DnaD	4	4	1.2912e-05	1.64758e-05	0.351637	0.405045
A0A125W5Y3	OG1RF_RS07435	OG1RF_11444	HMPREF9498_01678	hypothetical protein	4	4	2.24925e-05	2.86266e-05	0.347909	0.207513
A0A125W1X0	OG1RF_RS09400		HMPREF9498_02931	acylphosphatase	3	4	5.0461e-06	6.41849e-06	0.347066	0.255505
A0A125W7V9	OG1RF_RS11260	OG1RF_12196	HMPREF9498_00953	RNA-binding protein	4	4	1.39607e-05	1.77401e-05	0.345646	0.25893
A0A125W762	OG1RF_RS11255	OG1RF_12195	HMPREF9498_00952	hypothetical protein	4	4	2.34625e-05	2.9807e-05	0.345294	0.801846
A0A125W7M4	OG1RF_RS00100	OG1RF_10019	HMPREF9498_01064	PTS mannose transporter subunit IIAB	4	4	0.00403781	0.00512079	0.342795	1.74742
A0A125WA38	OG1RF_RS03500	OG1RF_10674	HMPREF9498_00165	Cof-type HAD-IIB family hydrolase	4	4	4.32843e-05	5.45828e-05	0.334601	1.31237
A0A125W9B7	OG1RF_RS03360	OG1RF_10646	HMPREF9498_00137	GNAT family N-acetyltransferase	4	4	1.81689e-05	2.28838e-05	0.332854	2.39507
A0A125W256	OG1RF_RS05590	OG1RF_11078	dnaK	molecular chaperone DnaK	4	4	0.0172993	0.0217725	0.331793	1.81547
A0A125W5Y1	OG1RF_RS07505	OG1RF_11458	gpsA	glycerol-3-phosphate dehydrogenase (NAD(P)(+))	4	4	0.000111008	0.000139645	0.331097	0.838729
A0A125W805	OG1RF_RS04785	OG1RF_10916	HMPREF9498_00880	gamma-glutamyl-gamma-aminobutyrate hydrolase	4	4	0.000116953	0.000146917	0.32907	0.278213
A0A125W499	OG1RF_RS02795	OG1RF_10531	HMPREF9498_02258	hypothetical protein	4	2	9.57948e-07	1.2023e-06	0.327773	0.120729
A0A125W8C2	OG1RF_RS04995	OG1RF_10958	HMPREF9498_00835	multifunctional 2',3'-cyclic-nucleotide 2'-phosphodiesterase/5'-nucleotidase/3'-nucleotidase	4	4	3.47273e-06	4.34934e-06	0.324725	0.273216
A0A125W642	OG1RF_RS07495	OG1RF_11456	HMPREF9498_01691	DUF948 domain-containing protein	4	4	8.71867e-06	1.08827e-05	0.319861	0.35977
A0A125W569	OG1RF_RS02270	OG1RF_10425	HMPREF9498_01849	HIT family protein	4	4	0.000276564	0.000345172	0.319703	1.18682
A0A125W8P1	OG1RF_RS05415	OG1RF_11043	infB	translation initiation factor IF-2	4	4	0.000256083	0.000319574	0.319535	0.706098
A0A125W1P7	OG1RF_RS06455	OG1RF_11247	cgtA	GTPase ObgE	4	4	0.00020001	0.000249459	0.31873	1.29786
A0A125W356	OG1RF_RS12450	OG1RF_12436	HMPREF9498_02616	hypothetical protein	4	4	1.55635e-05	1.93997e-05	0.317869	0.40921
A0A125W2B9	OG1RF_RS09230	OG1RF_11804	HMPREF9498_02960	gfo/Idh/MocA family oxidoreductase	4	4	4.9843e-05	6.21026e-05	0.317263	1.97369
A0A125W7Q5	OG1RF_RS13010	OG1RF_12541	ychF	redox-regulated ATPase YchF	4	4	0.000230777	0.000287232	0.315718	1.30099
A0A125W7W7	OG1RF_RS11320	OG1RF_12207	HMPREF9498_00964	ABC transporter ATP-binding protein	4	4	4.37126e-06	5.43827e-06	0.315097	0.611746
A0A125W216	OG1RF_RS06560	OG1RF_11268	der	ribosome biogenesis GTPase Der	4	4	0.000111456	0.000138066	0.308887	0.430032
A0A125W8S2	OG1RF_RS01935	OG1RF_10357	nrdI	class Ib ribonucleoside-diphosphate reductase assembly flavoprotein NrdI	4	4	3.94292e-06	4.88086e-06	0.307871	0.685427
A0A125W9J5	OG1RF_RS11185	OG1RF_12186	HMPREF9498_00448	enoyl-[acyl-carrier-protein] reductase FabK	4	4	2.32479e-05	2.87554e-05	0.306733	0.583633
A0A125W9T1	OG1RF_RS08175	OG1RF_11594	HMPREF9498_00420	oxidoreductase	4	4	3.16928e-06	3.9061e-06	0.301573	1.0857
A0A125W661	OG1RF_RS07585	OG1RF_11476	secA	protein translocase subunit SecA	4	4	0.000185672	0.000228818	0.301448	0.944285
A0A125W272	OG1RF_RS09380	OG1RF_11832	tsf	elongation factor Ts	4	4	0.00925431	0.0113765	0.297855	1.75235
A0A125W406	OG1RF_RS08505	OG1RF_11659	HMPREF9498_02389	DNA translocase FtsK	4	4	1.2518e-06	1.5364e-06	0.295553	0.235133
A0A125W6T7	OG1RF_RS10790	OG1RF_12110	dltC	D-alanine--poly(phosphoribitol) ligase subunit 2	2	2	4.82747e-07	5.91982e-07	0.294286	0.0889619
A0A125W538	OG1RF_RS07350	OG1RF_11427	HMPREF9498_01846	carbamoyl-phosphate synthase large subunit	4	4	0.000143611	0.000175967	0.293143	1.48084
A0A125W9I7	OG1RF_RS08100	OG1RF_11579	HMPREF9498_00405	hypothetical protein	4	3	9.51151e-07	1.16279e-06	0.28985	0.184661
A0A125W3Y9	OG1RF_RS02135	OG1RF_10396	HMPREF9498_02364	hypothetical protein	4	4	1.44556e-05	1.76551e-05	0.288458	0.151432
A0A125W5T3	OG1RF_RS07260	OG1RF_11409	HMPREF9498_01642	NAD(P)H-dependent oxidoreductase	4	4	0.000325703	0.000396667	0.284368	0.699849
A0A125W2R0	OG1RF_RS09240	OG1RF_11806	HMPREF9498_02958	pyridoxal phosphate-dependent aminotransferase	4	4	0.000161363	0.000196409	0.283554	0.759622
A0A125WA97	OG1RF_RS03705	OG1RF_10716	HMPREF9498_00207	TlyA family rRNA (cytidine-2'-O)-methyltransferase	4	4	1.8621e-06	2.26211e-06	0.280739	0.280952
A0A125W3C2	OG1RF_RS08865	OG1RF_11731	rfbD	dTDP-4-dehydrorhamnose reductase	4	4	0.000659933	0.000801356	0.280124	0.761144
A0A125WAN3	OG1RF_RS03785	OG1RF_10731	HMPREF9498_00222	YggS family pyridoxal phosphate-dependent enzyme	4	4	4.61371e-06	5.58904e-06	0.276672	0.866619
A0A125W7T2	OG1RF_RS12990	OG1RF_12537	serS	serine--tRNA ligase	4	4	0.000666038	0.000805985	0.27515	1.81991
A0A125W7V7	OG1RF_RS04655	OG1RF_10890	rexB	ATP-dependent helicase	4	4	6.10033e-05	7.38134e-05	0.274994	0.495804
A0A125W7L7	OG1RF_RS00050	OG1RF_10008	HMPREF9498_01054	single-stranded DNA-binding protein	4	4	0.000154884	0.000187283	0.274037	1.96607
A0A125W6K1	OG1RF_RS00915	OG1RF_10182	ecfA	energy-coupling factor transporter ATPase	3	4	7.62744e-06	9.1839e-06	0.267908	0.170207
A0A125W4C2	OG1RF_RS07775	OG1RF_11514	HMPREF9498_02244	beta-galactosidase	4	3	3.70308e-06	4.45849e-06	0.267827	0.126728
A0A125W2V2	OG1RF_RS10265	OG1RF_12006	groL	molecular chaperone GroEL	4	4	0.00600208	0.0072223	0.266996	2.14283
A0A125W641	OG1RF_RS07550	OG1RF_11467	pstB	phosphate ABC transporter ATP-binding protein	4	4	1.12462e-05	1.35078e-05	0.264356	0.218639
A0A125W304	OG1RF_RS12215	OG1RF_12384	HMPREF9498_02665	PASTA domain-containing protein	4	4	6.46782e-05	7.76215e-05	0.263177	0.185932
A0A125W3N7	OG1RF_RS08870	OG1RF_11732	rfbB	dTDP-glucose 4,6-dehydratase	4	4	0.00163343	0.00195992	0.262886	0.586447
A0A125W456	OG1RF_RS08755	OG1RF_11706	HMPREF9498_02320	glycosyltransferase	4	4	5.15504e-06	6.18362e-06	0.262467	0.219599
A0A125WAA4	OG1RF_RS03805	OG1RF_10735	HMPREF9498_00226	cell division protein DivIVA	4	4	0.00373709	0.00447685	0.260569	0.910909
A0A125W3C8	OG1RF_RS12630	OG1RF_12473	HMPREF9498_02578	tRNA-dihydrouridine synthase	4	4	0.000112757	0.000134996	0.259702	0.936434
A0A125W9U1	OG1RF_RS02115	OG1RF_10392	HMPREF9498_00323	M3B subfamily peptidase	4	4	0.000974882	0.00116423	0.256073	1.05197
A0A125W5L6	OG1RF_RS02635	OG1RF_10498	uvrA	excinuclease ABC subunit UvrA	4	4	0.000278113	0.000331149	0.251809	2.52824
A0A125W2W3	OG1RF_RS10120	OG1RF_11979	azoR	FMN-dependent NADH-azoreductase	4	4	0.000919731	0.00109093	0.24627	1.38047
A0A125W1H4	OG1RF_RS06865	OG1RF_11329	pflB	formate C-acetyltransferase	4	4	0.0328998	0.0389843	0.244815	2.01244
A0A125W7Y4	OG1RF_RS04795	OG1RF_10918	HMPREF9498_00878	NUDIX domain-containing protein	4	4	1.43251e-05	1.69696e-05	0.244406	0.701142
A0A125W4N3	OG1RF_RS01465	OG1RF_10265	HMPREF9498_02157	hypothetical protein	4	3	6.46744e-06	7.64764e-06	0.241821	0.138848
A0A125W1P3	OG1RF_RS06325	OG1RF_11221	lysA	diaminopimelate decarboxylase	4	4	0.000246025	0.000290672	0.240585	0.329539
A0A125W8R6	OG1RF_RS01050	OG1RF_10210	hslO	redox-regulated molecular chaperone Hsp33	4	4	0.000526647	0.000621634	0.239229	1.98564
A0A125W652	OG1RF_RS10845	OG1RF_12120	rsmI	16S rRNA (cytidine(1402)-2'-O)-methyltransferase	3	4	1.45832e-06	1.72093e-06	0.238884	0.103125
A0A125W5V6	OG1RF_RS07790	OG1RF_11517	HMPREF9498_01488	tagatose-6-phosphate ketose	4	4	7.63116e-06	8.99588e-06	0.237362	0.265638
A0A125W6W4	OG1RF_RS10645	OG1RF_12081	rplJ	50S ribosomal protein L10	4	4	0.00388719	0.00457899	0.236301	1.49101
A0A125W2C6	OG1RF_RS09105	OG1RF_11779	HMPREF9498_02985	hypothetical protein	3	4	4.5919e-07	5.40615e-07	0.23551	0.148791
A0A125W310	OG1RF_RS12080	OG1RF_12357	gshAB	bifunctional glutamate--cysteine ligase/glutathione synthetase	4	4	0.000196678	0.000230726	0.230345	1.04556
A0A125W8S9	OG1RF_RS01895	OG1RF_10349	dapF	diaminopimelate epimerase	4	4	0.000196666	0.000230704	0.2303	1.75433
A0A125W7R7; A0A125W5F7	OG1RF_RS07395	OG1RF_11436		formate--tetrahydrofolate ligase	4	4	2.86924e-05	3.36563e-05	0.230206	1.27393
A0A125W983	OG1RF_RS08030	OG1RF_11565	trmD	tRNA (guanosine(37)-N1)-methyltransferase TrmD	4	4	5.56852e-05	6.51934e-05	0.227433	0.549724
A0A125W673	OG1RF_RS07275	OG1RF_11412	HMPREF9498_01645	putative DNA-binding protein	4	4	6.7248e-06	7.87023e-06	0.226915	0.209014
A0A125W5S7	OG1RF_RS07235	OG1RF_11404	rnz	ribonuclease Z	2	2	1.05742e-06	1.23639e-06	0.225581	0.0663034
A0A125W8Z6	OG1RF_RS11680	OG1RF_12281	paiA	N-acetyltransferase	4	4	1.92597e-05	2.25148e-05	0.225287	0.91857
A0A125W3I8	OG1RF_RS08500	OG1RF_11658	HMPREF9498_02390	GntR family transcriptional regulator	4	4	2.58824e-06	3.02315e-06	0.224083	0.322257
A0A125W2T5	OG1RF_RS09190	OG1RF_11796	purK	5-(carboxyamino)imidazole ribonucleotide synthase	4	4	0.000189333	0.000220982	0.223002	1.07978
A0A125WAM0	OG1RF_RS03895	OG1RF_10754	HMPREF9498_00244	GNAT family N-acetyltransferase	4	4	7.63449e-06	8.90676e-06	0.222369	0.553271
A0A125W6D5	OG1RF_RS01270	OG1RF_10226	fabF	beta-ketoacyl-[acyl-carrier-protein] synthase II	4	4	0.0023282	0.00270978	0.218957	1.01985
A0A125W1C7	OG1RF_RS06440	OG1RF_11244	HMPREF9498_03139	S1 RNA-binding protein	4	4	0.000101886	0.000118405	0.21677	0.410055
A0A125W1E0	OG1RF_RS06880	OG1RF_11332	HMPREF9498_03053	CoA-binding protein	4	4	0.000308424	0.000358286	0.216194	0.736933
A0A125W8K2	OG1RF_RS01810	OG1RF_10332	HMPREF9498_00725	isochorismate synthase	4	4	0.000174461	0.000202395	0.214274	0.756829
A0A125W4P8	OG1RF_RS12830	OG1RF_12516	folE	GTP cyclohydrolase I FolE	4	4	3.36644e-05	3.90374e-05	0.213633	0.212893
A0A125W1N2	OG1RF_RS06555	OG1RF_11267	rpsA	30S ribosomal protein S1	4	4	0.00613457	0.00711236	0.213366	2.91082
A0A125W867	OG1RF_RS11340	OG1RF_12211	HMPREF9498_00968	DNA-binding response regulator	4	4	3.17238e-05	3.66551e-05	0.208445	0.276666
A0A125WA03	OG1RF_RS03325	OG1RF_10639	HMPREF9498_00130	ABC transporter ATP-binding protein	4	4	9.95254e-05	0.000114897	0.207201	0.747274
A0A125W2X6	OG1RF_RS12480	OG1RF_12442	HMPREF9498_02610	NAD(P)-dependent oxidoreductase	4	4	7.52269e-06	8.65005e-06	0.20146	0.606927
A0A125W215	OG1RF_RS09170	OG1RF_11792	HMPREF9498_02972	nucleoside 2-deoxyribosyltransferase	4	4	0.000147089	0.000169096	0.201159	0.310953
A0A125W379	OG1RF_RS12385	OG1RF_12419	HMPREF9498_02629	insulinase family protein	4	4	0.000149127	0.000171435	0.201125	0.601032
A0A125W722	OG1RF_RS00880	OG1RF_10175	rpsM	30S ribosomal protein S13	4	4	0.00395246	0.00453676	0.198912	0.788661
A0A125W9X2; A0A125W807	OG1RF_RS04780	OG1RF_10915		aldo/keto reductase	4	4	4.5389e-05	5.20566e-05	0.197738	0.842399
A0A125W862	OG1RF_RS11330	OG1RF_12209	HMPREF9498_00966	iron-sulfur cluster biosynthesis protein	4	4	0.000164783	0.00018892	0.19721	0.914911
A0A125W7X8	OG1RF_RS11370	OG1RF_12217	HMPREF9498_00974	UDP-N-acetylglucosamine 2-epimerase (non-hydrolyzing)	4	4	7.20688e-05	8.26106e-05	0.196952	0.762926
A0A125W8P5	OG1RF_RS04960	OG1RF_10951	HMPREF9498_00842	fructokinase	4	4	0.000119365	0.000136504	0.193567	0.341239
A0A125W7P2	OG1RF_RS12035	OG1RF_12349	pepT	peptidase T	3	3	3.76545e-06	4.30368e-06	0.192748	0.0741264
A0A125W7Z5	OG1RF_RS00215	OG1RF_10042	gltX	glutamate--tRNA ligase	4	4	0.00177695	0.00203093	0.19274	2.01697
A0A125W2S5	OG1RF_RS10370	OG1RF_12027	coaB	phosphopantothenate--cysteine ligase	4	4	5.41147e-05	6.18309e-05	0.192308	0.713285
A0A125W916	OG1RF_RS11180	OG1RF_12185	fabD	[acyl-carrier-protein] S-malonyltransferase	4	4	0.00121937	0.00138936	0.188279	0.765927
A0A125W8B2	OG1RF_RS04710	OG1RF_10901	HMPREF9498_00895	metallophosphoesterase	4	4	3.36407e-05	3.82657e-05	0.185843	0.332866
A0A125W2S3	OG1RF_RS10235	OG1RF_12000	nadE	NAD(+) synthetase	4	4	0.000438257	0.00049799	0.18434	0.569628
A0A125W360	OG1RF_RS12390	OG1RF_12420	mscL	large conductance mechanosensitive channel protein MscL	4	4	0.000131029	0.000148711	0.18262	0.208264
A0A125W6U7	OG1RF_RS10775	OG1RF_12107	HMPREF9498_01357	DUF975 domain-containing protein	2	3	1.91724e-06	2.17074e-06	0.179151	0.0663974
A0A125W5R0	OG1RF_RS07185	OG1RF_11394	msrA	peptide-methionine (S)-S-oxide reductase	4	4	0.000107942	0.000122188	0.178842	0.252596
A0A125W843	OG1RF_RS12030	OG1RF_12348	HMPREF9498_00995	N-acetyltransferase	1	2	8.144e-06	9.21664e-06	0.178504	0.0378262
A0A125W7B5; A0A125W7B2	OG1RF_RS00625	OG1RF_10124		BMP family ABC transporter substrate-binding protein	4	4	9.62159e-05	0.000108753	0.176708	0.777052
A0A125W5K7	OG1RF_RS10560	OG1RF_12065	HMPREF9498_01764	NUDIX hydrolase	4	4	6.19189e-05	6.99862e-05	0.176692	0.426989
A0A125W775	OG1RF_RS00790	OG1RF_10157	rpsC	30S ribosomal protein S3	4	4	0.00226615	0.00255276	0.171813	0.199733
A0A125WA28	OG1RF_RS03320	OG1RF_10638	HMPREF9498_00129	ABC transporter ATP-binding protein	4	4	5.49516e-05	6.17763e-05	0.16889	0.142113
A0A125W1X3	OG1RF_RS05945	OG1RF_11146	HMPREF9498_03240	glycerol dehydrogenase	4	4	0.000148322	0.000166683	0.168375	0.133012
A0A125W2S0	OG1RF_RS12540	OG1RF_12454	HMPREF9498_02597	WxL domain-containing protein	4	3	2.20937e-06	2.48176e-06	0.167732	0.101566
A0A125W465	OG1RF_RS08705	OG1RF_11696	glmM	phosphoglucosamine mutase	4	4	0.00129955	0.00145451	0.162522	2.65661
A0A125W9U0	OG1RF_RS08355	OG1RF_11629	HMPREF9498_00292	TIGR01440 family protein	4	4	2.82868e-05	3.16593e-05	0.162503	0.100521
A0A125W8E0	OG1RF_RS04905	OG1RF_10941	HMPREF9498_00855	asparaginase	4	4	7.78652e-05	8.69739e-05	0.159604	0.516059
A0A125W8H9	OG1RF_RS04875	OG1RF_10934	HMPREF9498_00861	peptidase M20	4	4	1.39339e-05	1.55265e-05	0.156133	0.22165
A0A125WAA8	OG1RF_RS03760	OG1RF_10726	murD	UDP-N-acetylmuramoyl-L-alanine--D-glutamate ligase	4	4	0.000339368	0.000377965	0.155403	0.63979
A0A125W7S3	OG1RF_RS13025	OG1RF_12544	soj	ParA family protein	3	4	1.14892e-05	1.27941e-05	0.155196	0.0661356
A0A125WA16	OG1RF_RS03040	OG1RF_10580	HMPREF9498_00072	type II toxin-antitoxin system PemK/MazF family toxin	2	1	8.61333e-07	9.5861e-07	0.154373	0.0307137
A0A125W3Y0	OG1RF_RS02885	OG1RF_10549	HMPREF9498_02240	PTS fructose transporter subunit IID	2	3	2.93051e-05	3.26137e-05	0.154323	0.0573358
A0A125W8A7	OG1RF_RS04975	OG1RF_10954	luxS	S-ribosylhomocysteine lyase	4	4	0.00240662	0.00267805	0.154178	0.73659
A0A125W1P4	OG1RF_RS06450	OG1RF_11246	gap	type I glyceraldehyde-3-phosphate dehydrogenase	4	4	6.40711e-05	7.11375e-05	0.150935	2.71119
A0A125W7B5	OG1RF_RS00630	OG1RF_10125	HMPREF9498_01189	BMP family ABC transporter substrate-binding protein	4	4	0.000592396	0.000657444	0.150306	0.274382
A0A125W615	OG1RF_RS07485	OG1RF_11454	HMPREF9498_01689	aminopeptidase P family protein	4	4	0.00080057	0.000887496	0.148712	0.679135
A0A125W3K2	OG1RF_RS11840	OG1RF_12311	HMPREF9498_02555	peptide ABC transporter substrate-binding protein	4	4	0.000234818	0.000258995	0.141381	0.239019
A0A125WAE4	OG1RF_RS03490	OG1RF_10672	HMPREF9498_00163	N-acetyltransferase	4	4	0.000106944	0.000117882	0.140492	0.365773
A0A125W1P8	OG1RF_RS13460	OG1RF_11152	HMPREF9498_03234	hydroxymethylglutaryl-CoA reductase, degradative	4	4	0.000120908	0.000133246	0.140183	0.519173
A0A125W3J4	OG1RF_RS11985	OG1RF_12339	fnt	formate/nitrite transporter	3	3	6.19821e-06	6.79679e-06	0.133002	0.0661901
A0A125W646	OG1RF_RS07565	OG1RF_11470	pstS	phosphate ABC transporter substrate-binding protein	4	4	1.76303e-05	1.93199e-05	0.132028	0.110952
A0A125W6Q2	OG1RF_RS10850	OG1RF_12121	HMPREF9498_01341	initiation-control protein YabA	4	4	2.21234e-05	2.42185e-05	0.130541	0.180891
A0A125W635	OG1RF_RS07580	OG1RF_11474	prfB	peptide chain release factor 2	4	4	9.39788e-05	0.000102865	0.130347	0.546279
A0A125W9G9	OG1RF_RS03665	OG1RF_10708	HMPREF9498_00198	aminopeptidase P family protein	4	4	0.000948443	0.00103641	0.127956	0.625318
A0A125W206	OG1RF_RS06610	OG1RF_11278	HMPREF9498_03105	hypothetical protein	4	4	0.00324827	0.00354859	0.127571	0.552794
A0A125W8I4	OG1RF_RS05405	OG1RF_11041	HMPREF9498_00675	DUF448 domain-containing protein	4	4	2.47354e-05	2.69996e-05	0.12636	0.23233
A0A125W6C4	OG1RF_RS01220	OG1RF_10216	HMPREF9498_01269	6-phospho-beta-glucosidase	4	4	1.75994e-05	1.91624e-05	0.122756	0.0826758
A0A125W2D7	OG1RF_RS09685	OG1RF_11893	HMPREF9498_02872	inositol monophosphatase family protein	4	4	0.000113878	0.000123951	0.122278	0.549397
A0A125WA07	OG1RF_RS03650	OG1RF_10705	rpmA	50S ribosomal protein L27	4	4	0.000299303	0.000324987	0.118774	0.0938795
A0A125W922	OG1RF_RS00935	OG1RF_10186	HMPREF9498_00631	hypothetical protein	4	4	5.65207e-05	6.13502e-05	0.118287	0.127277
A0A125W205	OG1RF_RS09225	OG1RF_11802	HMPREF9498_02962	hypothetical protein	4	4	0.00010018	0.000108057	0.109203	0.519431
A0A125WAJ2	OG1RF_RS11545	OG1RF_12254	HMPREF9498_00032	amidinotransferase	4	4	0.000105869	0.000114077	0.107728	0.655841
A0A125W9F7	OG1RF_RS11045	OG1RF_12158	HMPREF9498_00477	penicillin-binding protein 2	4	4	3.70998e-05	3.99547e-05	0.106956	0.0853546
A0A125W473	OG1RF_RS08985	OG1RF_11755	HMPREF9498_02498	hypothetical protein	4	4	3.717e-05	4.00089e-05	0.106181	0.198425
A0A125W3B3	OG1RF_RS11815	OG1RF_12307	HMPREF9498_02559	universal stress protein	4	4	3.47691e-05	3.73978e-05	0.105148	0.314096
A0A125W8Y8	OG1RF_RS05345	OG1RF_11028	HMPREF9498_00662	Cof-type HAD-IIB family hydrolase	4	4	7.77277e-05	8.35451e-05	0.104126	0.275748
A0A125W9A1	OG1RF_RS11055	OG1RF_12160	dmpI	tautomerase	4	4	2.24534e-05	2.40817e-05	0.101005	0.187466
A0A125W184	OG1RF_RS06640	OG1RF_11285	aroA	3-phosphoshikimate 1-carboxyvinyltransferase	4	4	0.00012439	0.000133179	0.0985002	0.911833
A0A125W1P4; A0A125W9Y4	OG1RF_RS08340	OG1RF_11626		type I glyceraldehyde-3-phosphate dehydrogenase	4	4	0.00156743	0.00167783	0.0982027	0.198437
A0A125W174	OG1RF_RS06690	OG1RF_11295	thyA	thymidylate synthase	4	4	0.00027319	0.000291448	0.0933331	0.204483
A0A125W2P0	OG1RF_RS09895	OG1RF_11933	HMPREF9498_02824	threonylcarbamoyl-AMP synthase	4	4	7.42068e-05	7.9147e-05	0.0929832	0.228641
A0A125W5C2	OG1RF_RS02470	OG1RF_10465	rumA	23S rRNA (uracil(1939)-C(5))-methyltransferase RlmD	4	4	0.000909884	0.00096922	0.0911429	0.607952
A0A125W3X5	OG1RF_RS11970	OG1RF_12336	def	peptide deformylase	4	4	0.000503571	0.000535966	0.0899475	0.444145
A0A125W3F5	OG1RF_RS11965	OG1RF_12335	rpsO	30S ribosomal protein S15	4	4	0.00160087	0.00170218	0.0885243	0.226997
A0A125W4W6	OG1RF_RS11415	OG1RF_12227	HMPREF9498_02040	haloacid dehalogenase	4	4	0.000113927	0.000121132	0.0884816	0.141578
A0A125W1H2	OG1RF_RS06810	OG1RF_11318	HMPREF9498_03067	alpha-glucosidase	4	4	8.26416e-06	8.78587e-06	0.0883169	0.118849
A0A125W747	OG1RF_RS10730	OG1RF_12098	HMPREF9498_01366	gfo/Idh/MocA family oxidoreductase	4	4	3.03719e-05	3.22672e-05	0.0873287	0.0661058
A0A125W764	OG1RF_RS00745	OG1RF_10148	thiD	bifunctional hydroxymethylpyrimidine kinase/phosphomethylpyrimidine kinase	4	4	1.82169e-05	1.92965e-05	0.0830635	0.198546
A0A125W2N8	OG1RF_RS10070	OG1RF_11968	manA	mannose-6-phosphate isomerase, class I	4	4	0.00144652	0.00153032	0.0812495	0.175063
A0A125W737	OG1RF_RS00930	OG1RF_10185	truA	tRNA pseudouridine(38-40) synthase TruA	4	4	0.000112729	0.000119004	0.0781476	0.122686
A0A125W1F6	OG1RF_RS06735	OG1RF_11304	HMPREF9498_03080	transcriptional repressor	4	4	0.000173703	0.000183109	0.0760737	0.192767
A0A125W5H4	OG1RF_RS04050	OG1RF_10784	HMPREF9498_01805	sensor histidine kinase	3	4	6.69622e-06	7.04772e-06	0.0738109	0.043421
A0A125W7H3	OG1RF_RS00110	OG1RF_10021	HMPREF9498_01066	PTS mannose transporter subunit IID	4	4	0.000509513	0.000535285	0.0711879	0.0728548
A0A125W3A6	OG1RF_RS08875	OG1RF_11733	rfbC	dTDP-4-dehydrorhamnose 3,5-epimerase	4	4	0.00114727	0.00120488	0.070684	0.0903345
A0A125W5H1	OG1RF_RS02660	OG1RF_10503	HMPREF9498_01948	PEP phosphonomutase	4	4	4.13485e-05	4.3265e-05	0.0653642	0.162509
A0A125W5N1	OG1RF_RS02380	OG1RF_10447	ptsH	phosphocarrier protein HPr	4	4	0.00217581	0.00227136	0.0620036	0.123684
A0A125W891	OG1RF_RS04820	OG1RF_10923	rpoE	DNA-directed RNA polymerase subunit delta	4	4	0.000442813	0.000462254	0.0619863	0.0755321
A0A125W280	OG1RF_RS09420	OG1RF_11840	glyQ	glycine--tRNA ligase subunit alpha	4	4	0.00121241	0.00126554	0.0618758	0.20412
A0A125W542	OG1RF_RS12795	OG1RF_12509	HMPREF9498_02106	FMN-binding domain-containing protein	4	4	0.0016911	0.00176432	0.0611559	0.126338
A0A125WAJ0	OG1RF_RS11515	OG1RF_12248	HMPREF9498_00038	PTS lactose transporter subunit IIB	3	4	3.71401e-06	3.87293e-06	0.0604484	0.0382046
A0A125W2S9	OG1RF_RS10185	OG1RF_11992	atpB	ATP synthase subunit A	4	4	5.75553e-06	5.99662e-06	0.0592016	0.0468126
A0A125W8G8	OG1RF_RS01800	OG1RF_10330	menB	1,4-dihydroxy-2-naphthoyl-CoA synthase	4	4	0.00129475	0.00134822	0.058381	0.703407
A0A125W6U2	OG1RF_RS10985	OG1RF_12147	HMPREF9498_01469	glucokinase	4	4	0.00170955	0.00177312	0.0526675	0.168971
A0A125W8W6	OG1RF_RS01035	OG1RF_10207	tilS	tRNA lysidine(34) synthetase TilS	4	4	1.62109e-05	1.68042e-05	0.0518554	0.0303455
A0A125W409	OG1RF_RS08775	OG1RF_11711	HMPREF9498_02314	CDP-glycerol glycerophosphotransferase	3	4	4.16717e-06	4.30153e-06	0.0457824	0.0288932
A0A125W774	OG1RF_RS00870	OG1RF_10173	infA	translation initiation factor IF-1	4	4	4.19322e-05	4.32568e-05	0.0448661	0.105253
A0A125WA42	OG1RF_RS03315	OG1RF_10637	HMPREF9498_00128	ABC transporter permease	4	4	3.2911e-05	3.39183e-05	0.0434911	0.0355268
A0A125W6W9	OG1RF_RS10945	OG1RF_12139	HMPREF9498_01322	nucleoid-associated protein, YbaB/EbfC family	4	4	3.56433e-05	3.67141e-05	0.0427022	0.0770376
A0A125W707	OG1RF_RS00755	OG1RF_10150	rpsJ	30S ribosomal protein S10	4	4	0.0062752	0.00643943	0.0372709	0.0986413
A0A125W1Z5	OG1RF_RS09415	OG1RF_11839	glyS	glycine--tRNA ligase subunit beta	4	4	0.00206597	0.00211953	0.0369281	0.312082
A0A125W1S9	OG1RF_RS05640	OG1RF_11088	nagA	N-acetylglucosamine-6-phosphate deacetylase	4	4	0.000830099	0.000850662	0.0353019	0.0923303
A0A125W749	OG1RF_RS00860	OG1RF_10171	secY	preprotein translocase subunit SecY	4	4	3.09015e-05	3.16608e-05	0.0350247	0.0206563
A0A125W7B2	OG1RF_RS00625	OG1RF_10124	HMPREF9498_01188	BMP family ABC transporter substrate-binding protein	4	4	0.000164454	0.000168112	0.0317386	0.0384552
A0A125W9A7	OG1RF_RS03310	OG1RF_10636	HMPREF9498_00127	ABC transporter permease	4	4	1.29293e-05	1.32135e-05	0.0313726	0.0267738
A0A125W823	OG1RF_RS05190	OG1RF_10998	HMPREF9498_00793	NAD(P)H-dependent oxidoreductase	4	4	4.09142e-05	4.16966e-05	0.027329	0.0299818
A0A125W7N6	OG1RF_RS00225	OG1RF_10044	cysS	cysteine--tRNA ligase	4	4	0.000639909	0.000651485	0.0258641	0.0696963
A0A125W6D5; A0A125W988	OG1RF_RS11170	OG1RF_12183		beta-ketoacyl-[acyl-carrier-protein] synthase II	4	4	0.000287803	0.000292612	0.0239069	0.109803
A0A125W198	OG1RF_RS06595	OG1RF_11275	dapB	4-hydroxy-tetrahydrodipicolinate reductase	4	4	0.000171445	0.000174282	0.0236763	0.0482349
A0A125W2J6	OG1RF_RS09520	OG1RF_11860	guaC	GMP reductase	4	4	0.000428948	0.000435421	0.0216079	0.0399979
A0A125W853	OG1RF_RS11275	OG1RF_12199	HMPREF9498_00956	peptidylprolyl isomerase	4	4	0.00158605	0.00160798	0.0198085	0.101741
A0A125W219	OG1RF_RS05630	OG1RF_11086	HMPREF9498_03292	hypothetical protein	4	4	3.24648e-05	3.28856e-05	0.018577	0.0393933
A0A125W7L2	OG1RF_RS12980	OG1RF_12535	HMPREF9498_01000	DNA-binding response regulator	4	4	6.95038e-05	7.03986e-05	0.0184558	0.0337858
A0A125W1X2	OG1RF_RS06025	OG1RF_11161	HMPREF9498_03223	bifunctional oligoribonuclease/PAP phosphatase NrnA	4	4	0.000419685	0.000424693	0.0171153	0.0463059
A0A125W8D9	OG1RF_RS04980	OG1RF_10955	asd	aspartate-semialdehyde dehydrogenase	4	4	0.000296088	0.000298931	0.0137862	0.0688843
A0A125W778	OG1RF_RS00670	OG1RF_10133	deoB	phosphopentomutase	4	4	0.00143659	0.00144733	0.0107504	0.0788301
A0A125W177	OG1RF_RS06695	OG1RF_11296	folA	trimethoprim-resistant dihydrofolate reductase DfrE	4	4	0.000128015	0.000128896	0.00989397	0.0183749
A0A125W1M9	OG1RF_RS06420	OG1RF_11240	HMPREF9498_03143	ATPase	4	4	5.63418e-05	5.66962e-05	0.00904687	0.00664576
A0A125W7Z9	OG1RF_RS04830	OG1RF_10925	HMPREF9498_00871	penicillin-binding protein 1A	4	4	2.25876e-05	2.27027e-05	0.00733204	0.00523323
A0A125W4N2	OG1RF_RS12815	OG1RF_12513	HMPREF9498_02111	geranylgeranyl pyrophosphate synthase	4	4	9.61436e-06	9.65765e-06	0.00648255	0.00685255
A0A125W9K1	OG1RF_RS03815	OG1RF_10737	zwf	glucose-6-phosphate dehydrogenase	4	4	0.00176339	0.00177047	0.00578165	0.011384
A0A125W6U4	OG1RF_RS10655	OG1RF_12083	rplK	50S ribosomal protein L11	4	4	0.00335469	0.00336624	0.00495808	0.0296509
A0A125WAL2	OG1RF_RS12695	OG1RF_12488	HMPREF9498_00011	DNA starvation/stationary phase protection protein	4	4	0.00429758	0.00431024	0.00424365	0.00885429
A0A125W6S2	OG1RF_RS10840	OG1RF_12119	HMPREF9498_01343	ABC transporter ATP-binding protein	4	4	1.87815e-05	1.88212e-05	0.00304101	0.00269965
A0A125W5K3	OG1RF_RS13490	OG1RF_11475	HMPREF9498_01710	hypothetical protein	4	4	2.96721e-05	2.95286e-05	-0.00699504	0.017992
A0A125W357	OG1RF_RS10455	OG1RF_12044	pepF	oligoendopeptidase F	4	4	0.00162036	0.00161055	-0.0087589	0.0351194
A0A125W3B5	OG1RF_RS12415	OG1RF_12426	pgmB	beta-phosphoglucomutase	4	4	0.000111928	0.000111232	-0.00899626	0.012534
A0A125W571	OG1RF_RS02220	OG1RF_10414	HMPREF9498_01838	phosphoglucomutase	4	4	3.11548e-05	3.09575e-05	-0.00916234	0.0102033
A0A125W4N9	OG1RF_RS12800	OG1RF_12510	HMPREF9498_02107	NAD(P)/FAD-dependent oxidoreductase	4	4	0.00075942	0.000753864	-0.0105955	0.0100092
A0A125W2H4	OG1RF_RS10365	OG1RF_12026	HMPREF9498_02727	quinone oxidoreductase	4	4	0.000154695	0.00015353	-0.0109056	0.0174591
A0A125W1R1	OG1RF_RS06270	OG1RF_11210	ntpE	V-type ATPase subunit E	4	4	8.1516e-05	8.06071e-05	-0.0161766	0.0360147
A0A125W5Y9	OG1RF_RS07570	OG1RF_11472	HMPREF9498_01707	ABC transporter permease	4	4	2.15597e-05	2.12675e-05	-0.0196842	0.010434
A0A125W8A9	OG1RF_RS05115	OG1RF_10983	npr	NADH peroxidase	4	4	0.00346635	0.00341871	-0.0199651	0.057564
A0A125W328	OG1RF_RS09680	OG1RF_11892	typA	translational GTPase TypA	4	4	0.000242871	0.000239064	-0.0227911	0.0442874
A0A125W6F6	OG1RF_RS01370	OG1RF_10245	HMPREF9498_01299	aminopeptidase C	4	4	0.0012688	0.00124774	-0.0241477	0.103947
A0A125W2Z1	OG1RF_RS10150	OG1RF_11985	atpC	ATP synthase epsilon chain	4	4	0.000143502	0.0001411	-0.0243518	0.075265
A0A125W1L9	OG1RF_RS06655	OG1RF_11288	HMPREF9498_03096	LytR family transcriptional regulator	3	4	8.28016e-07	8.14155e-07	-0.0243552	0.0138289
A0A125W6K4	OG1RF_RS07875	OG1RF_11534	HMPREF9498_01554	DUF3324 domain-containing protein	3	4	1.08525e-06	1.06515e-06	-0.0269792	0.0175737
A0A125W587	OG1RF_RS02405	OG1RF_10452	tig	trigger factor	4	4	0.00576441	0.00565213	-0.0283771	0.296254
A0A125W1M2	OG1RF_RS05955	OG1RF_11148	dhaK	dihydroxyacetone kinase subunit DhaK	4	4	0.000178614	0.000175024	-0.0292967	0.0716591
A0A125W2W7	OG1RF_RS10155	OG1RF_11986	atpD	ATP synthase subunit beta	4	4	0.00197509	0.00193535	-0.0293235	0.0937302
A0A125W4J0	OG1RF_RS02740	OG1RF_10519	HMPREF9498_02269	esterase family protein	4	4	7.60743e-05	7.43382e-05	-0.0333057	0.0610302
A0A125W4H0	OG1RF_RS12790	OG1RF_12508	HMPREF9498_02105	FAD:protein FMN transferase	4	4	0.000235055	0.000229491	-0.0345626	0.0370352
A0A125W9W7	OG1RF_RS02125	OG1RF_10394	HMPREF9498_00321	YebC/PmpR family DNA-binding transcriptional regulator	4	4	4.21813e-06	4.10971e-06	-0.037566	0.0331681
A0A125W779	OG1RF_RS11360	OG1RF_12215	mltG	endolytic transglycosylase MltG	4	4	2.1682e-05	2.11128e-05	-0.0383776	0.026128
A0A125W342	OG1RF_RS12500	OG1RF_12446	HMPREF9498_02606	succinyl-diaminopimelate desuccinylase	4	4	0.00039614	0.00038534	-0.0398767	0.253484
A0A125W8A4	OG1RF_RS01930	OG1RF_10356	HMPREF9498_00701	class 1b ribonucleoside-diphosphate reductase subunit alpha	4	4	0.00302894	0.00294628	-0.0399173	0.248608
A0A125W2B0	OG1RF_RS09165	OG1RF_11791	HMPREF9498_02973	GNAT family acetyltransferase	4	4	5.29212e-05	5.14633e-05	-0.0403025	0.0680633
A0A125W675	OG1RF_RS10700	OG1RF_12092	nusG	transcription termination/antitermination protein NusG	4	4	0.00047052	0.000453168	-0.0542104	0.15059
A0A125W5F7	OG1RF_RS07395	OG1RF_11436	fhs	formate--tetrahydrofolate ligase	4	4	0.000517605	0.000498422	-0.0544831	0.203362
A0A125W7U9	OG1RF_RS12045	OG1RF_12351	HMPREF9498_00992	iron ABC transporter substrate-binding protein	4	4	5.99476e-06	5.76697e-06	-0.0558868	0.0440731
A0A125W5B0	OG1RF_RS02375	OG1RF_10446	HMPREF9498_01889	hypothetical protein	4	4	7.56294e-05	7.27461e-05	-0.0560769	0.162517
A0A125W8U0	OG1RF_RS01835	OG1RF_10337	HMPREF9498_00720	acetate--CoA ligase	4	4	0.00142214	0.0013679	-0.0561048	0.200354
A0A125W5Q9	OG1RF_RS07115	OG1RF_11379	HMPREF9498_01612	NAD(P)-dependent oxidoreductase	4	4	0.000176774	0.000169518	-0.0604715	0.417003
A0A125W2B1	OG1RF_RS09600	OG1RF_11876	HMPREF9498_02889	2-dehydropantoate 2-reductase	4	4	0.000936239	0.000896476	-0.0626119	0.296508
A0A125WAG2	OG1RF_RS03480	OG1RF_10670	HMPREF9498_00161	hypothetical protein	2	4	1.07043e-06	1.02144e-06	-0.0675827	0.0250994
A0A125W6I9	OG1RF_RS10980	OG1RF_12146	HMPREF9498_01470	rhodanese-like domain-containing protein	3	4	1.10363e-05	1.05309e-05	-0.0676369	0.0351464
A0A125W7F3	OG1RF_RS00795	OG1RF_10158	rplP	50S ribosomal protein L16	4	4	0.00455733	0.00434632	-0.0683933	0.794499
A0A125W2L1	OG1RF_RS10165	OG1RF_11988	atpA	ATP synthase subunit alpha	4	4	0.00180881	0.00172387	-0.0693884	0.171762
A0A125W606	OG1RF_RS07575	OG1RF_11473	ftsE	cell division ATP-binding protein FtsE	4	4	4.02899e-05	3.83408e-05	-0.0715361	0.0574013
A0A125W7G9	OG1RF_RS00500	OG1RF_10100	argF	ornithine carbamoyltransferase	4	4	0.00185409	0.00176208	-0.0734317	0.0804649
A0A125W3B4	OG1RF_RS10160	OG1RF_11987	atpG	ATP synthase subunit gamma	4	4	0.000197525	0.00018731	-0.0766094	0.24374
A0A125W1G3	OG1RF_RS06235	OG1RF_11203	HMPREF9498_03181	NADP-specific glutamate dehydrogenase	4	4	0.00131658	0.00124838	-0.0767408	0.608374
A0A125W7F2	OG1RF_RS00785	OG1RF_10156	rplV	50S ribosomal protein L22	4	4	0.00447671	0.00423609	-0.0797071	0.259831
A0A125W8K8	OG1RF_RS11115		HMPREF9498_00462	ribosome silencing factor	4	4	8.08048e-05	7.6411e-05	-0.0806608	0.305489
A0A125W8L5	OG1RF_RS00995	OG1RF_10199	ldh	L-lactate dehydrogenase	4	4	0.00665786	0.0062886	-0.08232	1.14311
A0A125W738	OG1RF_RS10780	OG1RF_12108	HMPREF9498_01356	M42 family peptidase	4	4	0.00059532	0.000562001	-0.0830926	0.266128
A0A125W3M4	OG1RF_RS12475	OG1RF_12441	HMPREF9498_02611	hypothetical protein	4	4	0.000123462	0.000116513	-0.0835676	0.0827793
A0A125W2P5	OG1RF_RS09590		rpsT	30S ribosomal protein S20	4	4	0.000129327	0.000121892	-0.08543	0.113211
A0A125W973	OG1RF_RS11175	OG1RF_12184	fabG	3-oxoacyl-[acyl-carrier-protein] reductase	4	4	9.02332e-05	8.49997e-05	-0.0862012	0.0816083
A0A125W384	OG1RF_RS11975	OG1RF_12337	HMPREF9498_02529	Cof-type HAD-IIB family hydrolase	4	4	1.57915e-06	1.48722e-06	-0.0865321	0.0540157
A0A125W5C9	OG1RF_RS02415	OG1RF_10454	HMPREF9498_01898	PTS fructose transporter subunit IIC	4	4	0.000493077	0.000464319	-0.0866975	0.0648809
A0A125W234	OG1RF_RS05860	OG1RF_11130	HMPREF9498_03256	peptidase M4	4	4	0.00058063	0.00054676	-0.086711	0.0309915
A0A125W2U9	OG1RF_RS10080	OG1RF_11970	HMPREF9498_02785	glyoxalase	4	4	0.00319894	0.00300544	-0.0900174	1.63441
A0A125W7C1	OG1RF_RS00505	OG1RF_10101	arcC	carbamate kinase 1	4	4	0.00030236	0.000284	-0.0903744	0.0831887
A0A125W2Z7	OG1RF_RS12380	OG1RF_12418	HMPREF9498_02630	insulinase family protein	4	4	0.000205934	0.000192293	-0.0988797	0.614242
A0A125W7U4	OG1RF_RS11305	OG1RF_12204	HMPREF9498_00961	MBL fold metallo-hydrolase	4	4	0.000491275	0.000458242	-0.100423	0.742735
A0A125W1N0	OG1RF_RS05950	OG1RF_11147	HMPREF9498_03239	PTS-dependent dihydroxyacetone kinase phosphotransferase subunit DhaM	4	4	5.91951e-05	5.50399e-05	-0.105	0.367342
A0A125W2F7	OG1RF_RS05865	OG1RF_11131	HMPREF9498_03255	sulfate ABC transporter ATP-binding protein	3	4	9.61496e-07	8.93167e-07	-0.106351	0.0621744
A0A125W1E6	OG1RF_RS06830	OG1RF_11322	HMPREF9498_03063	glycoside hydrolase family 1 protein	4	4	4.59151e-05	4.26295e-05	-0.10712	0.12579
A0A125W8L4	OG1RF_RS01660	OG1RF_10302	HMPREF9498_00753	ABC transporter ATP-binding protein	4	4	1.40517e-07	1.30091e-07	-0.111223	0.0511909
A0A125W2Z2	OG1RF_RS09890	OG1RF_11932	glyA	serine hydroxymethyltransferase	4	4	0.00218307	0.00201939	-0.112436	0.582681
A0A125W528	OG1RF_RS02550	OG1RF_10480	HMPREF9498_01925	VOC family protein	4	4	6.16118e-05	5.69226e-05	-0.114204	0.157084
A0A125W895	OG1RF_RS05130	OG1RF_10986	budA	acetolactate decarboxylase	4	4	1.55414e-05	1.43476e-05	-0.115304	0.296421
A0A125W3N1	OG1RF_RS08710	OG1RF_11697	HMPREF9498_02329	hypothetical protein	4	4	5.51587e-06	5.08279e-06	-0.117969	0.0751188
A0A125WA10	OG1RF_RS03255	OG1RF_10625	yajC	preprotein translocase subunit YajC	4	4	8.02384e-05	7.34773e-05	-0.126993	0.139805
A0A125W7Y5	OG1RF_RS00205	OG1RF_10040	HMPREF9498_01087	PIN/TRAM domain-containing protein	3	4	5.89538e-06	5.39771e-06	-0.127238	0.0842181
A0A125W7E6	OG1RF_RS00705	OG1RF_10140	HMPREF9498_01202	NADH-dependent alcohol dehydrogenase	4	4	0.00173306	0.00158583	-0.128078	0.755622
A0A125W859	OG1RF_RS05005	OG1RF_10960	HMPREF9498_00833	TIGR01457 family HAD-type hydrolase	4	4	0.000222392	0.000203158	-0.130508	0.726421
A0A125W1W9	OG1RF_RS05935	OG1RF_11144	lpdA	dihydrolipoyl dehydrogenase	4	4	0.00129645	0.00118058	-0.135076	0.555394
A0A125W5J2	OG1RF_RS07725	OG1RF_11504	ilvE	branched-chain amino acid aminotransferase	4	4	0.000395212	0.000359526	-0.136532	0.662854
A0A125W2E4	OG1RF_RS09635	OG1RF_11883	coaD	phosphopantetheine adenylyltransferase	4	4	4.03354e-05	3.66901e-05	-0.136657	0.473629
A0A125W2X4	OG1RF_RS12355	OG1RF_12413	HMPREF9498_02635	hypothetical protein	4	3	2.1942e-06	1.99571e-06	-0.136796	0.0997928
A0A125W739	OG1RF_RS00810	OG1RF_10161	rplN	50S ribosomal protein L14	4	4	0.00362529	0.00329407	-0.138223	0.997786
A0A125W491	OG1RF_RS08730	OG1RF_11701	glnA	type I glutamate--ammonia ligase	4	4	0.00357174	0.00324105	-0.140169	2.27674
A0A125W7G4	OG1RF_RS00835	OG1RF_10166	rplF	50S ribosomal protein L6	4	4	0.010452	0.00947152	-0.142118	1.13679
A0A125W7T7	OG1RF_RS12505	OG1RF_12447	HMPREF9498_00886	DUF3298 domain-containing protein	2	2	2.06823e-07	1.87384e-07	-0.142392	0.0377757
A0A125W6V6	OG1RF_RS10725	OG1RF_12097	murB	UDP-N-acetylenolpyruvoylglucosamine reductase	4	4	0.000446084	0.000401933	-0.150361	1.06346
A0A125W394	OG1RF_RS10270	OG1RF_12007	groS	co-chaperone GroES	4	4	0.00314614	0.00283353	-0.150981	0.68495
A0A125W887	OG1RF_RS05275	OG1RF_11014	HMPREF9498_00777	glycoside hydrolase family 1 protein	4	4	0.000179997	0.000162022	-0.15178	0.224554
A0A125W7M0	OG1RF_RS05125	OG1RF_10985	alsS	acetolactate synthase AlsS	4	4	0.000156384	0.000140736	-0.152097	0.605139
A0A125W9E4	OG1RF_RS08035	OG1RF_11566	rimM	ribosome maturation factor RimM	4	4	0.000455266	0.000409295	-0.15357	2.08323
A0A125W5M0	OG1RF_RS04040	OG1RF_10782	gnd	phosphogluconate dehydrogenase (NADP(+)-dependent, decarboxylating)	4	4	0.00730694	0.00656738	-0.15395	2.23667
A0A125W5S5	OG1RF_RS02575	OG1RF_10486	HMPREF9498_01931	WxL domain-containing protein	4	4	0.000135502	0.000121556	-0.156689	0.242779
A0A125W7V8	OG1RF_RS04800	OG1RF_10919	HMPREF9498_00877	Cof-type HAD-IIB family hydrolase	4	4	0.000650902	0.000583856	-0.156826	0.508071
A0A125WA25	OG1RF_RS08335	OG1RF_11625	pgk	phosphoglycerate kinase	4	4	0.0525301	0.0471122	-0.157043	1.74075
A0A125W7M7	OG1RF_RS00105	OG1RF_10020	HMPREF9498_01065	PTS mannose/fructose/sorbose transporter subunit IIC	3	4	9.1568e-05	8.21133e-05	-0.157228	0.0992079
A0A125W1L0	OG1RF_RS06705	OG1RF_11298	lexA	LexA repressor	4	4	9.46612e-06	8.48118e-06	-0.158508	0.121838
A0A125W311	OG1RF_RS09915	OG1RF_11938	HMPREF9498_02819	flavocytochrome c	4	4	0.00447572	0.00400769	-0.159346	0.229651
A0A125W1Z4	OG1RF_RS09300	OG1RF_11818	proS	proline--tRNA ligase	4	4	0.0023627	0.00211535	-0.159542	0.712132
A0A125W755	OG1RF_RS00775	OG1RF_10154	rplB	50S ribosomal protein L2	4	4	0.015903	0.0142325	-0.16011	1.46621
A0A125W565	OG1RF_RS02240	OG1RF_10418	HMPREF9498_01842	YlbF family regulator	4	4	0.00479696	0.00428484	-0.16288	0.396088
A0A125W3P4	OG1RF_RS11960	OG1RF_12334	pnp	polyribonucleotide nucleotidyltransferase	4	4	0.00304595	0.00271925	-0.163684	1.29828
A0A125W264	OG1RF_RS05650	OG1RF_11090	HMPREF9498_03288	hypothetical protein	4	4	2.41214e-06	2.1534e-06	-0.163696	0.140315
A0A125WA77	OG1RF_RS03515	OG1RF_10677	HMPREF9498_00168	tRNA (adenosine(37)-N6)-threonylcarbamoyltransferase complex ATPase subunit type 1 TsaE	4	4	4.35701e-05	3.88958e-05	-0.163727	0.327334
A0A125W118			plsY		4	3	1.9206e-06	1.71282e-06	-0.165188	0.0902206
A0A125W5Q8	OG1RF_RS10550	OG1RF_12063	mtnN	5'-methylthioadenosine/adenosylhomocysteine nucleosidase	4	4	0.000841194	0.000749873	-0.165792	1.06288
A0A125W9S0	OG1RF_RS08325	OG1RF_11623	eno	enolase	4	4	0.083913	0.0746173	-0.169383	1.92047
A0A125W6Z3	OG1RF_RS00800	OG1RF_10159	rpmC	50S ribosomal protein L29	4	4	0.00041112	0.000365483	-0.169754	0.201299
A0A125W8B5	OG1RF_RS01880	OG1RF_10346	HMPREF9498_00711	PTS fructose transporter subunit IIA	4	4	1.63234e-06	1.4489e-06	-0.171982	0.378841
A0A125W5F0	OG1RF_RS02580	OG1RF_10487	HMPREF9498_01932	WxL domain-containing protein	3	3	1.31755e-06	1.16773e-06	-0.174151	0.0692161
A0A125W346	OG1RF_RS11990	OG1RF_12340	rpsD	30S ribosomal protein S4	4	4	0.0118416	0.0104917	-0.174617	1.16148
A0A125W175	OG1RF_RS06715	OG1RF_11300	tkt	transketolase	4	4	0.00734923	0.00650836	-0.1753	2.0375
A0A125W5I9	OG1RF_RS07490	OG1RF_11455	HMPREF9498_01690	YtxH domain-containing protein	4	4	0.00032687	0.000289249	-0.176402	0.26564
A0A125W2J5	OG1RF_RS09480	OG1RF_11852	thrC	threonine synthase	4	4	0.00106748	0.00094356	-0.178025	1.07263
A0A125W3S5	OG1RF_RS08930	OG1RF_11744	HMPREF9498_02485	aminopeptidase	4	4	0.00310953	0.00274416	-0.180332	0.536726
A0A125W648	OG1RF_RS07175	OG1RF_11392	HMPREF9498_01625	PDZ domain-containing protein	3	3	1.01356e-06	8.94063e-07	-0.180985	0.0665211
A0A125W8P6	OG1RF_RS10960	OG1RF_12142	galE	UDP-glucose 4-epimerase GalE	4	4	0.000539534	0.00047576	-0.181481	1.96879
A0A125W9T2	OG1RF_RS01970	OG1RF_10363	HMPREF9498_00352	glyoxalase/bleomycin resistance/dioxygenase family protein	4	4	0.000175354	0.000154611	-0.181628	0.554195
A0A125W8E2	OG1RF_RS01925	OG1RF_10355	HMPREF9498_00702	class 1b ribonucleoside-diphosphate reductase subunit beta	4	4	0.000758705	0.00066869	-0.182201	0.810378
A0A125W1I3	OG1RF_RS06620	OG1RF_11281	aroF	3-deoxy-7-phosphoheptulonate synthase	4	4	0.000274808	0.00024208	-0.18294	0.336179
A0A125W705	OG1RF_RS00780	OG1RF_10155	rpsS	30S ribosomal protein S19	4	4	0.00246553	0.00217017	-0.184091	0.235634
A0A125W1Q0	OG1RF_RS05850	OG1RF_11128	trxB	thioredoxin-disulfide reductase	4	4	0.000558112	0.000491151	-0.184389	1.0878
A0A125W2F6	OG1RF_RS09500	OG1RF_11856	HMPREF9498_02910	phospho-sugar mutase	4	4	0.00466016	0.00409919	-0.185044	1.12175
A0A125WA82	OG1RF_RS03035	OG1RF_10579	alr	alanine racemase	4	4	0.000302176	0.000265624	-0.186001	1.29664
A0A125W325	OG1RF_RS12220	OG1RF_12385	HMPREF9498_02664	serine/threonine-protein phosphatase	4	4	0.000299895	0.000263429	-0.187041	4.46076
A0A125W985	OG1RF_RS11205	OG1RF_12190	HMPREF9498_00443	DUF1797 domain-containing protein	4	4	0.000681414	0.000598372	-0.187489	0.792265
A0A125W5U6	OG1RF_RS04445	OG1RF_10848	galM	galactose-1-epimerase	3	3	3.55574e-06	3.11863e-06	-0.189237	0.0981422
A0A125W404	OG1RF_RS02165	OG1RF_10402	pepV	dipeptidase PepV	4	4	0.00444564	0.00389847	-0.189483	3.23225
A0A125W7D7	OG1RF_RS00645	OG1RF_10128	HMPREF9498_01192	ABC transporter permease	4	3	3.53756e-06	3.09248e-06	-0.193991	0.107272
A0A125W929	OG1RF_RS11700	OG1RF_12285	HMPREF9498_00571	linear amide C-N hydrolase	4	3	8.2472e-06	7.20138e-06	-0.195631	0.0779582
A0A125W704	OG1RF_RS00185	OG1RF_10036	proA	gamma-glutamyl-phosphate reductase	4	4	0.000313073	0.000273118	-0.196978	1.23721
A0A125W1M8	OG1RF_RS06070	OG1RF_11170	pepT	peptidase T	4	4	0.00138248	0.00120577	-0.19731	1.52395
A0A125W6N9	OG1RF_RS00680	OG1RF_10135	deoD	purine-nucleoside phosphorylase	4	4	0.00050181	0.000437526	-0.197772	2.08547
A0A125W9U6	OG1RF_RS08115	OG1RF_11582	HMPREF9498_00408	lactonase family protein	4	4	0.00141823	0.00123638	-0.197976	1.52764
A0A125W2B2	OG1RF_RS06065	OG1RF_11169	HMPREF9498_03215	Nif3-like dinuclear metal center hexameric protein	4	4	0.000462442	0.000401841	-0.202647	0.852903
A0A125W7H2	OG1RF_RS00895	OG1RF_10178	rplQ	50S ribosomal protein L17	4	4	0.00412609	0.00357905	-0.205196	1.84476
A0A125W743	OG1RF_RS00730	OG1RF_10145	rpsG	30S ribosomal protein S7	4	4	0.0117435	0.0101819	-0.205854	1.35726
A0A125WAI1	OG1RF_RS03890	OG1RF_10753	gmuD	glycoside hydrolase family 1 protein	4	4	1.96677e-05	1.70304e-05	-0.207715	0.132076
A0A125W309	OG1RF_RS12205	OG1RF_12382	rpe	ribulose-phosphate 3-epimerase	4	4	0.000129377	0.000112006	-0.208002	0.979846
A0A125W9R6	OG1RF_RS12690	OG1RF_12487	rplM	50S ribosomal protein L13	4	4	0.0112926	0.00976458	-0.209743	1.60413
A0A125W6Z6	OG1RF_RS00710	OG1RF_10141	gpmA	2,3-bisphosphoglycerate-dependent phosphoglycerate mutase	4	4	0.0107599	0.00930133	-0.210149	1.17711
A0A125W7J2	OG1RF_RS13150	OG1RF_12569	HMPREF9498_01035	sodium ion-translocating decarboxylase subunit beta	2	1	2.82174e-07	2.43344e-07	-0.213589	0.0460912
A0A125W756	OG1RF_RS00770	OG1RF_10153	rplW	50S ribosomal protein L23	4	4	0.0057605	0.00495547	-0.217173	2.36347
A0A125W5T9	OG1RF_RS02625	OG1RF_10496	HMPREF9498_01941	glutamine ABC transporter substrate-binding protein GlnH	4	4	0.000191783	0.000164969	-0.217281	0.105943
A0A125W5B1	OG1RF_RS02385	OG1RF_10448	ptsP	phosphoenolpyruvate--protein phosphotransferase	4	4	0.0137884	0.0118226	-0.221912	2.95133
A0A125W768	OG1RF_RS00635	OG1RF_10126	HMPREF9498_01190	ABC transporter ATP-binding protein	4	4	4.91331e-05	4.2078e-05	-0.223629	0.135587
A0A125W678	OG1RF_RS07215	OG1RF_11400	apt	adenine phosphoribosyltransferase	4	4	0.00125033	0.00107042	-0.224133	1.37963
A0A125W9K4	OG1RF_RS08220	OG1RF_11602	HMPREF9498_00425	cation-translocating P-type ATPase	4	4	0.000147783	0.000126262	-0.227051	0.187377
A0A125W7P7	OG1RF_RS00195	OG1RF_10038	dut	dUTP diphosphatase	4	4	0.000152537	0.000130245	-0.227927	0.712016
A0A125W1I0	OG1RF_RS06185	OG1RF_11193	trxA	thioredoxin	4	4	0.000250033	0.000213406	-0.228517	0.890604
A0A125W3M1	OG1RF_RS11825	OG1RF_12309	pepA	glutamyl aminopeptidase	4	4	0.00344786	0.0029386	-0.230571	2.51898
A0A125W5B7	OG1RF_RS02420	OG1RF_10455	pfkB	1-phosphofructokinase	4	4	0.00267652	0.00227854	-0.232252	2.7073
A0A125W7A5	OG1RF_RS00675	OG1RF_10134	HMPREF9498_01196	purine-nucleoside phosphorylase	4	4	0.000574224	0.000488244	-0.234013	0.832901
A0A125W295	OG1RF_RS09820	OG1RF_11919	HMPREF9498_02842	glycine cleavage system protein H	4	4	0.00024115	0.000204946	-0.234687	0.883127
A0A125W200	OG1RF_RS09215	OG1RF_11800	HMPREF9498_02964	N-acetylmuramoyl-L-alanine amidase	4	4	1.65735e-06	1.40759e-06	-0.235646	0.209433
A0A125W557	OG1RF_RS02590	OG1RF_10489	HMPREF9498_01934	WxL domain-containing protein	4	4	0.00017399	0.000147497	-0.238318	0.472662
A0A125W5B4	OG1RF_RS04025	OG1RF_10779	pyk	pyruvate kinase	4	4	0.0223347	0.0189082	-0.24028	4.33475
A0A125W653	OG1RF_RS07545	OG1RF_11466	pstB	phosphate ABC transporter ATP-binding protein	3	4	1.05712e-05	8.92999e-06	-0.243411	0.119805
A0A125W2E0	OG1RF_RS09565	OG1RF_11869	ptbA	PTS system protein, IIA component	4	4	0.000147687	0.000124642	-0.24475	0.308235
A0A125W3D0	OG1RF_RS09015	OG1RF_11761	HMPREF9498_02504	ABC transporter substrate-binding protein	3	2	3.70345e-06	3.12508e-06	-0.244977	0.0957228
A0A125W6Q7	OG1RF_RS10640	OG1RF_12080	rplL	50S ribosomal protein L7/L12	4	4	0.0128107	0.0107725	-0.249995	1.17967
A0A125W7C3	OG1RF_RS13125	OG1RF_12564	citF	citrate lyase subunit alpha	4	4	0.000532075	0.000446778	-0.252071	1.18423
A0A125W9Y4	OG1RF_RS08340	OG1RF_11626	gap	type I glyceraldehyde-3-phosphate dehydrogenase	4	4	0.0517608	0.0434114	-0.253788	1.21087
A0A125WAI0	OG1RF_RS12685	OG1RF_12486	rpsI	30S ribosomal protein S9	4	4	0.00741796	0.00621173	-0.256028	0.787137
A0A125W3F4	OG1RF_RS08915	OG1RF_11741	HMPREF9498_02482	flavodoxin	4	4	0.000462709	0.000387256	-0.256816	1.23274
A0A125W5L0	OG1RF_RS07625	OG1RF_11484	HMPREF9498_01720	DUF2829 domain-containing protein	4	4	4.05982e-05	3.39332e-05	-0.258719	0.85161
A0A125W501	OG1RF_RS02450	OG1RF_10461	gatC	Asp-tRNA(Asn)/Glu-tRNA(Gln) amidotransferase GatCAB subunit C	4	4	0.000122884	0.000102646	-0.259627	0.724666
A0A125W6V3	OG1RF_RS10955	OG1RF_12141	HMPREF9498_01320	galactose-1-phosphate uridylyltransferase	4	4	5.9193e-05	4.94395e-05	-0.259762	0.232905
A0A125W9Q1	OG1RF_RS08025	OG1RF_11564	rplS	50S ribosomal protein L19	4	4	0.00686873	0.00573314	-0.260717	2.68328
A0A125W9K8	OG1RF_RS08330	OG1RF_11624	tpiA	triose-phosphate isomerase	4	4	0.0143725	0.0119926	-0.261164	2.25271
A0A125W688	OG1RF_RS10650	OG1RF_12082	rplA	50S ribosomal protein L1	4	4	0.0124775	0.010404	-0.262198	2.22219
A0A125W8U1	OG1RF_RS01015		HMPREF9498_00648	RNA-binding S4 domain-containing protein	4	4	1.18484e-05	9.87026e-06	-0.263527	0.248517
A0A125W3T5	OG1RF_RS08975	OG1RF_11753	treP	PTS trehalose transporter subunit IIBC	3	4	5.28728e-06	4.40106e-06	-0.264675	0.118253
A0A125W7V4	OG1RF_RS00025	OG1RF_10003	yaaA	S4 domain-containing protein YaaA	4	4	3.92698e-05	3.25956e-05	-0.268746	2.11744
A0A125W8Q1	OG1RF_RS04925	OG1RF_10945	fba	fructose-1,6-bisphosphate aldolase, class II	4	4	0.0194246	0.0161012	-0.270716	1.90374
A0A125W7V5	OG1RF_RS11265	OG1RF_12197	HMPREF9498_00954	pyridoxal phosphate-dependent aminotransferase	4	4	0.000395854	0.000327939	-0.271539	1.5564
A0A125W9W1	OG1RF_RS03105	OG1RF_10593	HMPREF9498_00085	osmoprotectant ABC transporter substrate-binding protein	3	4	7.30504e-06	6.04127e-06	-0.274042	0.110126
A0A125W9E0	OG1RF_RS03510	OG1RF_10676	pta	phosphate acetyltransferase	4	4	0.00274685	0.00226468	-0.278474	1.7701
A0A125W9Z3	OG1RF_RS03160	OG1RF_10605	HMPREF9498_00096	aldo/keto reductase	4	4	0.000231436	0.000190717	-0.279179	0.789624
A0A125W5Z8	OG1RF_RS07610	OG1RF_11481	HMPREF9498_01717	PTS sugar transporter subunit IIB	4	4	9.77661e-05	8.02435e-05	-0.28495	0.286569
A0A125W942	OG1RF_RS01040	OG1RF_10208	hpt	hypoxanthine-guanine phosphoribosyltransferase	4	4	0.00134472	0.00110177	-0.287487	1.68205
A0A125W3I6	OG1RF_RS11820	OG1RF_12308	HMPREF9498_02558	thioredoxin	4	4	6.24958e-05	5.1188e-05	-0.287952	1.85338
A0A125W714	OG1RF_RS00830	OG1RF_10165	rpsH	30S ribosomal protein S8	4	4	0.00919723	0.00752857	-0.288824	2.22962
A0A125W7N3	OG1RF_RS13005	OG1RF_12540	HMPREF9498_01005	DUF1129 domain-containing protein	4	4	6.59207e-06	5.38659e-06	-0.291359	0.174729
A0A125W789	OG1RF_RS11405	OG1RF_12225	HMPREF9498_00982	cold-shock protein	4	4	0.0202936	0.0165753	-0.291992	0.820158
A0A125W773	OG1RF_RS10935	OG1RF_12137	thiM	hydroxyethylthiazole kinase	3	3	1.37595e-06	1.12168e-06	-0.294762	0.0958548
A0A125W8M3			HMPREF9498_00746		3	4	0.000146683	0.000119524	-0.295404	0.197494
A0A125W4L7	OG1RF_RS02215	OG1RF_10413	argR	arginine repressor	4	4	4.21472e-06	3.43276e-06	-0.296068	0.185437
A0A125W2I9	OG1RF_RS10180	OG1RF_11991	atpE	ATP synthase F0 subunit C	2	2	1.21137e-05	9.86268e-06	-0.296591	0.0904924
A0A125W4U5	OG1RF_RS02510	OG1RF_10473	HMPREF9498_01917	amidase	4	4	1.01167e-06	8.22312e-07	-0.298984	0.174534
A0A125W732	OG1RF_RS10770	OG1RF_12106	HMPREF9498_01358	hypothetical protein	4	4	0.000151976	0.000123424	-0.30023	0.917448
A0A125W3X4	OG1RF_RS08590	OG1RF_11675	HMPREF9498_02354	cysteine desulfurase	4	4	5.30565e-05	4.29548e-05	-0.304709	0.511814
A0A125W9V4	OG1RF_RS03345	OG1RF_10643	rplT	50S ribosomal protein L20	4	4	0.00397467	0.00321671	-0.305252	1.86824
A0A125W1Q5	OG1RF_RS06275	OG1RF_11211	HMPREF9498_03172	V-type ATPase subunit C	3	2	6.19582e-07	5.01254e-07	-0.305754	0.117356
A0A125W9B9	OG1RF_RS11190	OG1RF_12187	acpP	acyl carrier protein	4	4	0.00328067	0.00265026	-0.307859	0.946611
A0A125WAD0	OG1RF_RS03280	OG1RF_10630	mvaD	diphosphomevalonate decarboxylase	4	4	0.000178339	0.000143666	-0.311903	2.65372
A0A125W7E8	OG1RF_RS13130	OG1RF_12565	citE	citrate (pro-3S)-lyase subunit beta	4	4	0.000115041	9.2548e-05	-0.313869	1.12788
A0A125W5J6	OG1RF_RS02235	OG1RF_10417	HMPREF9498_01841	penicillin-binding protein 1A	2	1	1.40025e-07	1.12584e-07	-0.314684	0.0703286
A0A125W312	OG1RF_RS12090	OG1RF_12359	HMPREF9498_02690	YitT family protein	2	2	9.61922e-07	7.71571e-07	-0.31812	0.0965759
A0A125W1B4	OG1RF_RS06490	OG1RF_11254	HMPREF9498_03129	DUF871 domain-containing protein	4	4	0.000167336	0.000134125	-0.319167	1.34777
A0A125W8V1	OG1RF_RS11595	OG1RF_12264	HMPREF9498_00593	histidine phosphatase family protein	4	4	0.00010477	8.39345e-05	-0.319897	1.08508
A0A125W988	OG1RF_RS11170	OG1RF_12183	fabF	beta-ketoacyl-[acyl-carrier-protein] synthase II	4	4	0.00129913	0.00103973	-0.321341	1.95475
A0A125W6J6	OG1RF_RS00865	OG1RF_10172	adk	adenylate kinase	4	4	0.00579555	0.00463664	-0.321864	2.59159
A0A125W532	OG1RF_RS01585	OG1RF_10287	pcp	pyroglutamyl-peptidase I	4	4	0.00217543	0.00173916	-0.322906	1.78535
A0A125W5Y0	OG1RF_RS07250	OG1RF_11407	rpsP	30S ribosomal protein S16	4	4	0.00112658	0.000900079	-0.323823	1.52743
A0A125W7V3	OG1RF_RS11355	OG1RF_12214	greA	transcription elongation factor GreA	4	4	0.00428592	0.00342207	-0.324734	3.74257
A0A125W727	OG1RF_RS00855	OG1RF_10170	rplO	50S ribosomal protein L15	4	4	0.00747046	0.00594927	-0.328485	1.26877
A0A125W6H5	OG1RF_RS00765	OG1RF_10152	rplD	50S ribosomal protein L4	4	4	0.00655866	0.00522045	-0.329228	1.947
A0A125W1S0	OG1RF_RS07015	OG1RF_11359	hslV	HslU--HslV peptidase proteolytic subunit	4	4	0.000167329	0.000133038	-0.330855	1.95885
A0A125W5A7	OG1RF_RS02620	OG1RF_10495	HMPREF9498_01940	amino acid ABC transporter ATP-binding protein	4	4	0.000152753	0.000121426	-0.331123	0.732224
A0A125W8I9	OG1RF_RS11210	OG1RF_12191	HMPREF9498_00442	NAD(P)-dependent oxidoreductase	4	4	0.000773553	0.000614643	-0.33175	2.46152
A0A125W793	OG1RF_RS00615	OG1RF_10122	deoC	2-deoxyribose-5-phosphate aldolase	4	4	0.000890751	0.000707248	-0.332805	2.76103
A0A125W7J6	OG1RF_RS05280	OG1RF_11015	HMPREF9498_00776	oxidoreductase	4	4	0.000646811	0.000513459	-0.333097	1.15603
A0A125W8F7	OG1RF_RS04945	OG1RF_10948	rpmE	50S ribosomal protein L31 type B	4	4	0.000939453	0.000745225	-0.334145	0.877274
A0A125W1J7	OG1RF_RS06575	OG1RF_11271	HMPREF9498_03112	tetratricopeptide repeat protein	4	4	0.000306894	0.000242729	-0.338394	1.36854
A0A125W301	OG1RF_RS10105	OG1RF_11975	HMPREF9498_02780	glycoside hydrolase family 1 protein	4	4	0.000310999	0.000245761	-0.339656	0.240434
A0A125W2P9	OG1RF_RS10375	OG1RF_12028	coaC	phosphopantothenoylcysteine decarboxylase	4	4	0.000143965	0.000113714	-0.340311	1.82673
A0A125W1R6	OG1RF_RS06240	OG1RF_11204	pgi	glucose-6-phosphate isomerase	4	4	0.0150905	0.0118997	-0.342714	2.6551
A0A125W4R6	OG1RF_RS02750	OG1RF_10521	HMPREF9498_02267	ABC transporter ATP-binding protein	4	4	3.17299e-05	2.4945e-05	-0.347093	0.441006
A0A125W5K9	OG1RF_RS02585	OG1RF_10488	HMPREF9498_01933	legume lectins beta domain protein	2	2	9.13634e-08	7.17935e-08	-0.347763	0.104528
A0A125W2P3	OG1RF_RS09670	OG1RF_11890	HMPREF9498_02875	DUF1507 domain-containing protein	4	4	1.20835e-05	9.47571e-06	-0.350731	0.38692
A0A125W1U1	OG1RF_RS06255	OG1RF_11207	HMPREF9498_03176	V-type ATPase subunit F	4	4	0.000155401	0.000121062	-0.360249	0.421103
A0A125W6W7	OG1RF_RS13190	OG1RF_12577	rnpA	ribonuclease P protein component	4	4	3.26484e-05	2.54289e-05	-0.360544	1.85824
A0A125W8Y6	OG1RF_RS11685	OG1RF_12282	HMPREF9498_00574	MarR family transcriptional regulator	2	3	2.6356e-06	2.05062e-06	-0.362071	0.0798242
A0A125W6X4	OG1RF_RS00045	OG1RF_10007	rpsF	30S ribosomal protein S6	4	4	0.0101376	0.00788667	-0.362234	3.26373
A0A125W2P7	OG1RF_RS10385	OG1RF_12030	HMPREF9498_02723	aminoacyltransferase	4	4	1.78786e-06	1.38993e-06	-0.363227	0.364203
A0A125W3M7	OG1RF_RS08820	OG1RF_11722	HMPREF9498_02463	hypothetical protein	3	4	4.8352e-06	3.7545e-06	-0.364956	0.173826
A0A125W1N3	OG1RF_RS06375	OG1RF_11231	nagE	PTS N-acetylglucosamine transporter subunit IIABC	4	4	0.000206923	0.000160307	-0.368254	0.367669
A0A125W943	OG1RF_RS01030	OG1RF_10206	HMPREF9498_00651	RNA-binding protein S1	4	4	5.76476e-05	4.46361e-05	-0.369049	1.20002
A0A125W3M0	OG1RF_RS08760	OG1RF_11707	HMPREF9498_02319	epimerase	4	4	0.000279719	0.000215631	-0.375414	1.69222
A0A125W766	OG1RF_RS00610	OG1RF_10121	pdp	pyrimidine-nucleoside phosphorylase	4	4	0.000494818	0.000381101	-0.376724	1.76081
A0A125W8F9	OG1RF_RS04965	OG1RF_10952	HMPREF9498_00841	YtxH domain-containing protein	4	4	0.00012282	9.45285e-05	-0.377722	0.703583
A0A125W250	OG1RF_RS05645	OG1RF_11089	HMPREF9498_03289	hypothetical protein	4	4	2.38318e-05	1.83387e-05	-0.378002	0.264555
A0A125W9J3	OG1RF_RS02100	OG1RF_10389	HMPREF9498_00326	Xaa-Pro aminopeptidase	4	4	5.32939e-05	4.09414e-05	-0.38041	1.96917
A0A125W8I2	OG1RF_RS01905	OG1RF_10351	nagB	glucosamine-6-phosphate deaminase	4	4	0.000239618	0.000184017	-0.380893	2.61954
A0A125W765	OG1RF_RS00820	OG1RF_10163	rplE	50S ribosomal protein L5	4	4	0.0171259	0.0130626	-0.390744	2.64138
A0A125W999	OG1RF_RS11120	OG1RF_12173	HMPREF9498_00461	HD domain-containing protein	4	4	0.00017276	0.000131505	-0.393655	1.16496
A0A125W7E2	OG1RF_RS13155	OG1RF_12570	HMPREF9498_01036	acetyl-CoA carboxylase biotin carboxyl carrier protein subunit	4	4	2.01376e-05	1.53073e-05	-0.395672	2.51475
A0A125W6I1	OG1RF_RS00815	OG1RF_10162	rplX	50S ribosomal protein L24	4	4	0.00079951	0.000606528	-0.398542	1.48847
A0A125W1S5	OG1RF_RS05625	OG1RF_11085	HMPREF9498_03293	pyridoxal phosphate-dependent aminotransferase	4	4	9.94673e-05	7.53719e-05	-0.400195	2.61071
A0A125W619	OG1RF_RS07420	OG1RF_11441	aroD	3-dehydroquinase	4	4	1.88795e-05	1.42824e-05	-0.402578	0.686015
A0A125W4E9	OG1RF_RS12840	OG1RF_12518	folB	dihydroneopterin aldolase	4	4	1.44891e-05	1.09455e-05	-0.404635	1.91312
A0A125W2T9	OG1RF_RS10355	OG1RF_12024	potA	spermidine/putrescine ABC transporter ATP-binding protein	4	4	9.0837e-06	6.85118e-06	-0.406929	0.346814
A0A125W6W0	OG1RF_RS01355	OG1RF_10242	HMPREF9498_01296	copper transporter CopZ	4	4	5.11562e-06	3.83458e-06	-0.415839	1.03485
A0A125W7T9	OG1RF_RS11395	OG1RF_12223	HMPREF9498_00980	DUF1447 domain-containing protein	4	4	9.21312e-05	6.89583e-05	-0.417965	2.5923
A0A125W2H7	OG1RF_RS09495	OG1RF_11855	proC	pyrroline-5-carboxylate reductase	4	4	0.000775144	0.00058	-0.418411	1.99391
A0A125W464	OG1RF_RS02150	OG1RF_10399	murE	UDP-N-acetylmuramoyl-L-alanyl-D-glutamate--L- lysine ligase	4	4	0.000576392	0.000430551	-0.420869	0.671309
A0A125W7Q3	OG1RF_RS00425	OG1RF_10085	HMPREF9498_01136	diacylglycerol kinase	3	3	1.47377e-06	1.10053e-06	-0.421318	0.171505
A0A125W2J8	OG1RF_RS10130	OG1RF_11981	HMPREF9498_02774	PTS sorbitol transporter subunit IIA	4	4	0.000170163	0.000126306	-0.429987	1.60349
A0A125W448; A0A125W872	OG1RF_RS11380	OG1RF_12220		ABC transporter ATP-binding protein	3	4	2.30504e-06	1.70487e-06	-0.435133	0.193168
A0A125W4C8	OG1RF_RS12845	OG1RF_12519	gor	glutathione-disulfide reductase	4	4	0.000488995	0.000359727	-0.442917	2.11292
A0A125W5V7	OG1RF_RS07190	OG1RF_11395	HMPREF9498_01628	DUF2140 domain-containing protein	4	2	4.38247e-06	3.204e-06	-0.45187	0.18367
A0A125W9I3	OG1RF_RS08435	OG1RF_11644	ackA	acetate kinase	4	4	0.00730239	0.00532995	-0.454246	3.71308
A0A125W119	OG1RF_RS07000	OG1RF_11356	HMPREF9498_03028	aldose 1-epimerase family protein	4	4	0.000564297	0.000409368	-0.463055	2.23215
A0A125W5D3	OG1RF_RS02535	OG1RF_10477	HMPREF9498_01922	DUF1149 domain-containing protein	4	4	6.95286e-05	5.02906e-05	-0.467316	1.99216
A0A125W9X2	OG1RF_RS01965	OG1RF_10362	HMPREF9498_00353	aldo/keto reductase	4	4	5.86837e-05	4.237e-05	-0.469917	0.5015
A0A125W9G7	OG1RF_RS08160	OG1RF_11591	HMPREF9498_00417	type 1 glycerol-3-phosphate oxidase	3	1	2.93595e-05	2.10795e-05	-0.477989	0.129689
A0A125W8J8	OG1RF_RS11165	OG1RF_12182	accB	acetyl-CoA carboxylase biotin carboxyl carrier protein	4	4	0.00173188	0.00123479	-0.488075	3.29169
A0A125W7N8	OG1RF_RS11295	OG1RF_12202	HMPREF9498_00959	2',3'-cyclic-nucleotide 2'-phosphodiesterase	4	4	0.000720459	0.000512719	-0.490748	3.52837
A0A125W650	OG1RF_RS07870	OG1RF_11533	HMPREF9498_01555	alcohol dehydrogenase AdhP	4	4	5.1491e-05	3.65904e-05	-0.492855	2.37806
A0A125W2N5	OG1RF_RS09940	OG1RF_11943	HMPREF9498_02814	flavodoxin	2	2	4.09436e-07	2.89371e-07	-0.500718	0.158658
A0A125W2X7	OG1RF_RS09530	OG1RF_11862	guaD	guanine deaminase	4	4	6.51787e-05	4.59853e-05	-0.50323	0.627149
A0A125W3K3	OG1RF_RS02990	OG1RF_10570	HMPREF9498_02698	oxo-acid lyase	4	4	2.35133e-05	1.65599e-05	-0.505785	3.62373
A0A125W2Y8	OG1RF_RS12410	OG1RF_12425	HMPREF9498_02624	glycoside hydrolase family 65 protein	4	4	0.00146824	0.00103375	-0.506199	4.3214
A0A125W729	OG1RF_RS00760	OG1RF_10151	rplC	50S ribosomal protein L3	4	4	0.0129147	0.00907876	-0.508447	2.63957
A0A125W9X4	OG1RF_RS08390	OG1RF_11636	HMPREF9498_00285	bifunctional (p)ppGpp synthetase/guanosine-3',5'-bis(diphosphate) 3'-pyrophosphohydrolase	4	4	1.39275e-05	9.78544e-06	-0.509231	0.160788
A0A125W1P2	OG1RF_RS05900	OG1RF_11137	HMPREF9498_03249	alpha-glucosidase	4	4	5.75243e-06	4.01905e-06	-0.517316	1.96027
A0A125W741	OG1RF_RS00725	OG1RF_10144	rpsL	30S ribosomal protein S12	4	4	0.00168845	0.00117272	-0.525836	0.843195
A0A125W2R8	OG1RF_RS10420	OG1RF_12037	cutC	copper homeostasis protein CutC	4	4	0.000435788	0.000302367	-0.527326	2.40569
A0A125W274	OG1RF_RS09445	OG1RF_11845	HMPREF9498_02921	HDIG domain-containing protein	3	4	5.18766e-06	3.58186e-06	-0.534377	0.320328
A0A125W3R6	OG1RF_RS12235	OG1RF_12388	def	peptide deformylase	4	4	9.32326e-05	6.42902e-05	-0.536235	1.18899
A0A125W5Z3	OG1RF_RS07300	OG1RF_11417	HMPREF9498_01650	pyridoxal phosphate-dependent aminotransferase	4	4	0.000336749	0.000231924	-0.538022	1.52799
A0A125W1G8	OG1RF_RS06250	OG1RF_11206	HMPREF9498_03178	ribonucleotide reductase assembly protein NrdI	4	4	9.51287e-07	6.54461e-07	-0.539574	0.289764
A0A125W2D3	OG1RF_RS05970	OG1RF_11151	HMPREF9498_03235	hydroxymethylglutaryl-CoA synthase	4	4	0.000379306	0.000259123	-0.549722	1.80777
A0A125W7H1	OG1RF_RS13135	OG1RF_12566	citD	citrate lyase ACP	4	4	2.82634e-05	1.92441e-05	-0.554518	0.782731
A0A125W347	OG1RF_RS12530	OG1RF_12452	HMPREF9498_02599	WxL domain-containing protein	4	4	1.19277e-05	8.08621e-06	-0.560785	1.17605
A0A125W146	OG1RF_RS06855	OG1RF_11327	ppaC	manganese-dependent inorganic pyrophosphatase	4	4	0.00532333	0.00359935	-0.564594	0.926883
A0A125W9C6	OG1RF_RS11600	OG1RF_12265	HMPREF9498_00592	glutamyl-tRNA(Gln) amidotransferase	4	4	7.13015e-05	4.77603e-05	-0.57812	0.586216
A0A125W3V3	OG1RF_RS08695	OG1RF_11694	HMPREF9498_02332	heme ABC transporter ATP-binding protein	3	4	1.03862e-05	6.95155e-06	-0.579267	0.36484
A0A125W2B5	OG1RF_RS09205	OG1RF_11798	xpt	xanthine phosphoribosyltransferase	4	4	0.00118717	0.000793714	-0.580831	2.11065
A0A125W2Z6	OG1RF_RS09810	OG1RF_11918	metN	methionine ABC transporter ATP-binding protein	3	3	1.42466e-06	9.51966e-07	-0.581637	0.294894
A0A125WAD5	OG1RF_RS03640	OG1RF_10703	rplU	50S ribosomal protein L21	4	4	0.00682506	0.00453407	-0.590036	2.45891
A0A125W5Y6	OG1RF_RS07305	OG1RF_11418	HMPREF9498_01651	alpha-mannosidase	4	4	3.68678e-05	2.44004e-05	-0.595458	0.780676
A0A125W6M9	OG1RF_RS00620	OG1RF_10123	cdd	cytidine deaminase	4	4	7.41692e-05	4.90784e-05	-0.59573	2.14918
A0A125W6U5	OG1RF_RS00540	OG1RF_10108	HMPREF9498_01160	reactive intermediate/imine deaminase	4	4	5.82114e-06	3.84287e-06	-0.599118	1.74812
A0A125W3X8	OG1RF_RS08995	OG1RF_11757	HMPREF9498_02500	alpha-1,2-mannosidase	4	4	2.0846e-05	1.37193e-05	-0.603566	3.92991
A0A125W2E8	OG1RF_RS09185	OG1RF_11795	purB	adenylosuccinate lyase	4	4	0.00211406	0.00137999	-0.615351	1.99598
A0A125W1V7	OG1RF_RS06870	OG1RF_11330	parC	DNA topoisomerase IV subunit A	2	4	3.3248e-06	2.16948e-06	-0.615919	0.214053
A0A125W7S9	OG1RF_RS04805	OG1RF_10920	HMPREF9498_00876	phosphohydrolase	3	4	6.71665e-06	4.37994e-06	-0.61683	0.247204
A0A125W8N8	OG1RF_RS04970	OG1RF_10953	HMPREF9498_00840	oxygen-insensitive NADPH nitroreductase	4	4	9.77317e-05	6.35769e-05	-0.620323	1.47741
A0A125W1Z1	OG1RF_RS09305	OG1RF_11819	rseP	protease eep	4	4	2.68829e-05	1.74744e-05	-0.621449	0.378859
A0A125W7R1	OG1RF_RS00460	OG1RF_10092	HMPREF9498_01144	PTS sugar transporter subunit IIC	4	4	3.6573e-06	2.36974e-06	-0.62605	0.356783
A0A125W1T7	OG1RF_RS06205	OG1RF_11197	HMPREF9498_03187	ABC transporter permease	3	3	1.17979e-06	7.62227e-07	-0.630239	0.317216
A0A125W6D8			HMPREF9498_01534		3	2	9.18918e-06	5.90605e-06	-0.637741	0.286415
A0A125WA70	OG1RF_RS03465	OG1RF_10667	HMPREF9498_00158	folate family ECF transporter S component	4	4	5.28962e-05	3.39928e-05	-0.637934	0.54434
A0A125W715	OG1RF_RS01280	OG1RF_10228	pyrD	dihydroorotate oxidase	4	4	0.000297507	0.000191187	-0.637938	4.37236
A0A125W9N9	OG1RF_RS01985	OG1RF_10367	tdc	tyrosine decarboxylase	4	4	0.0155967	0.00996035	-0.646974	2.12956
A0A125W4L2	OG1RF_RS01560	OG1RF_10283	HMPREF9498_02175	AI-2E family transporter	2	1	1.0103e-06	6.44266e-07	-0.649048	0.150018
A0A125W787	OG1RF_RS00840	OG1RF_10167	rplR	50S ribosomal protein L18	4	4	0.00175159	0.00111327	-0.653862	1.84085
A0A125W8R8	OG1RF_RS11765	OG1RF_12298	HMPREF9498_00553	hypothetical protein	3	4	3.90151e-06	2.47865e-06	-0.65448	0.341116
A0A125W223	OG1RF_RS05915	OG1RF_11140	mgtA	magnesium-translocating P-type ATPase	4	4	7.47987e-06	4.73538e-06	-0.659534	0.378675
A0A125W4R3	OG1RF_RS01600	OG1RF_10290	HMPREF9498_02183	nitroreductase family protein	4	4	0.000257585	0.000162232	-0.666989	2.35083
A0A125W2Z4	OG1RF_RS12265	OG1RF_12394	HMPREF9498_02655	YicC family protein	4	4	6.70244e-05	4.17925e-05	-0.681441	1.07405
A0A125W7X9	OG1RF_RS11365	OG1RF_12216	HMPREF9498_00973	hydrolase	4	4	3.74699e-05	2.32729e-05	-0.687077	0.622805
A0A125W1G9	OG1RF_RS06915	OG1RF_11339	HMPREF9498_03046	carboxysome shell protein	3	3	3.75524e-07	2.31724e-07	-0.696495	0.329466
A0A125W442	OG1RF_RS08580	OG1RF_11673	trmU	tRNA 2-thiouridine(34) synthase MnmA	4	4	0.00576639	0.00354503	-0.70187	3.26884
A0A125W7W1	OG1RF_RS01815	OG1RF_10333	menD	2-succinyl-5-enolpyruvyl-6-hydroxy-3- cyclohexene-1-carboxylic-acid synthase	4	4	0.000163994	0.000100757	-0.702762	1.37483
A0A125W717	OG1RF_RS00805	OG1RF_10160	rpsQ	30S ribosomal protein S17	4	4	0.000808281	0.000493559	-0.711633	2.1841
A0A125W5N8	OG1RF_RS10490	OG1RF_12051	HMPREF9498_01750	DUF3324 domain-containing protein	3	2	3.10914e-06	1.89445e-06	-0.714733	0.313658
A0A125W3Q6	OG1RF_RS12285	OG1RF_12398	uxuA	mannonate dehydratase	3	2	1.70932e-06	1.03815e-06	-0.719413	0.296592
A0A125W3N9	OG1RF_RS12375	OG1RF_12417	HMPREF9498_02631	DUF4115 domain-containing protein	4	3	2.83858e-06	1.72044e-06	-0.722394	0.597401
A0A125WA11	OG1RF_RS03225	OG1RF_10618	HMPREF9498_00109	hypothetical protein	3	2	1.54197e-06	9.29713e-07	-0.729918	0.34212
A0A125W9Y8	OG1RF_RS03250	OG1RF_10624	tgt	tRNA guanosine(34) transglycosylase Tgt	4	4	0.000908403	0.000544492	-0.738423	0.456154
A0A125W336	OG1RF_RS09630	OG1RF_11882	HMPREF9498_02883	PDZ domain-containing protein	4	4	1.69472e-06	1.01192e-06	-0.743959	0.485963
A0A125W445; A0A125W1R6	OG1RF_RS08795	OG1RF_11715		glycosyltransferase family 2 protein	4	4	0.000336127	0.000200267	-0.747078	1.51678
A0A125W8P2	OG1RF_RS00955	OG1RF_10190	HMPREF9498_00635	amino acid ABC transporter ATP-binding protein	4	4	1.81688e-05	1.08006e-05	-0.750356	0.639152
A0A125W8R0	OG1RF_RS00960	OG1RF_10191	HMPREF9498_00636	glutamine ABC transporter substrate-binding protein	4	4	5.99346e-05	3.52721e-05	-0.764862	0.549397
A0A125W4V2	OG1RF_RS02990	OG1RF_10570	HMPREF9498_02143	oxo-acid lyase	3	3	5.71788e-06	3.33605e-06	-0.777339	0.411512
A0A125W2W8	OG1RF_RS09440	OG1RF_11844	ybeY	endoribonuclease YbeY	4	4	0.00011554	6.64969e-05	-0.797029	1.65651
A0A125W5U1	OG1RF_RS07310	OG1RF_11419	HMPREF9498_01652	metal-independent alpha-mannosidase	4	4	4.85557e-05	2.76213e-05	-0.813859	3.47213
A0A125W2I7	OG1RF_RS05655	OG1RF_11091	HMPREF9498_03287	ABC transporter ATP-binding protein	2	1	1.72266e-06	9.71594e-07	-0.826212	0.215717
A0A125W718	OG1RF_RS10880	OG1RF_12126	recR	recombination protein RecR	4	4	8.3187e-05	4.69053e-05	-0.826607	1.54536
A0A125W700	OG1RF_RS00850	OG1RF_10169	rpmD	50S ribosomal protein L30	4	4	0.000877134	0.000494284	-0.827456	1.50076
A0A125W1V2	OG1RF_RS06030	OG1RF_11162	HMPREF9498_03222	hypothetical protein	4	4	0.000246336	0.00013879	-0.827725	1.04872
A0A125W431	OG1RF_RS08715	OG1RF_11698	dacA	TIGR00159 family protein	4	4	6.3882e-07	3.58909e-07	-0.831791	0.491528
A0A125W9G8	OG1RF_RS08090	OG1RF_11577	HMPREF9498_00403	ROK family protein	4	4	3.25258e-05	1.82634e-05	-0.832628	1.16491
A0A125W8M1	OG1RF_RS01710	OG1RF_10312	kduI	5-keto-4-deoxyuronate isomerase	4	4	7.20586e-06	4.01812e-06	-0.842649	1.29325
A0A125W2A5	OG1RF_RS09405	OG1RF_11837	yidC	cytochrome oxidase biogenesis protein OxaA	3	4	2.06038e-05	1.14787e-05	-0.843953	0.457131
A0A125W6G8	OG1RF_RS04450	OG1RF_10849	galK	galactokinase	3	3	4.48816e-06	2.46784e-06	-0.862876	0.463881
A0A125W3K9	OG1RF_RS08800	OG1RF_11718	HMPREF9498_02459	hypothetical protein	4	4	5.59048e-06	3.06218e-06	-0.868416	1.17284
A0A125W3T1	OG1RF_RS08675	OG1RF_11690	HMPREF9498_02337	hypothetical protein	4	4	0.000214796	0.00011745	-0.870928	1.25849
A0A125W3D4	OG1RF_RS08860	OG1RF_11730	HMPREF9498_02471	glycosyltransferase family 2 protein	2	3	3.86277e-06	2.09469e-06	-0.882898	0.262019
A0A125W1Y7	OG1RF_RS09260	OG1RF_11810	HMPREF9498_02954	amino acid permease	2	1	2.37509e-06	1.26652e-06	-0.907115	0.226925
A0A125W7Y2	OG1RF_RS01715	OG1RF_10313	HMPREF9498_00744	gluconate 5-dehydrogenase	3	2	2.74351e-06	1.45669e-06	-0.913331	0.436475
A0A125W771	OG1RF_RS11310	OG1RF_12205	HMPREF9498_00962	carbohydrate ABC transporter permease	3	2	2.12425e-06	1.12618e-06	-0.91552	0.465511
A0A125W6X7	OG1RF_RS01310	OG1RF_10233	HMPREF9498_01287	cystathionine gamma-synthase	4	4	0.000631732	0.000326569	-0.951923	1.3745
A0A125W9Y0	OG1RF_RS03230	OG1RF_10619	HMPREF9498_00110	pyridoxal phosphate-dependent aminotransferase	4	4	1.74226e-05	8.97338e-06	-0.957235	1.13689
A0A125WA86	OG1RF_RS03560	OG1RF_10686	proC	pyrroline-5-carboxylate reductase	4	3	3.84556e-06	1.97916e-06	-0.958307	1.04179
A0A125W3B1	OG1RF_RS08815	OG1RF_11721	HMPREF9498_02462	sugar transferase	4	4	1.05588e-05	5.38559e-06	-0.971273	0.684285
A0A125W6Y1	OG1RF_RS01215	OG1RF_10215	HMPREF9498_01268	6-phospho-beta-glucosidase	4	4	0.000181581	9.21252e-05	-0.978949	1.63759
A0A125W927	OG1RF_RS11130	OG1RF_12175	HMPREF9498_00459	ribosome assembly RNA-binding protein YhbY	4	4	0.000314974	0.000155836	-1.0152	1.72941
A0A125W893	OG1RF_RS05305	OG1RF_11020	HMPREF9498_00771	hypothetical protein	3	3	8.66326e-06	4.12441e-06	-1.07072	0.490764
A0A125W9U5	OG1RF_RS08265	OG1RF_11610	HMPREF9498_00309	DUF2200 domain-containing protein	4	1	1.25465e-06	5.96623e-07	-1.07239	0.467669
A0A125W2G1	OG1RF_RS10390	OG1RF_12031	HMPREF9498_02722	QueT transporter family protein	4	4	9.37283e-06	4.40507e-06	-1.08932	0.359029
A0A125W758	OG1RF_RS00585	OG1RF_10116	coaA	type I pantothenate kinase	4	1	2.13747e-06	1.00208e-06	-1.0929	0.482084
A0A125W7N4	OG1RF_RS00145	OG1RF_10028	HMPREF9498_01074	RidA family protein	4	2	3.98457e-05	1.84466e-05	-1.11107	0.885163
A0A125W8W4	OG1RF_RS11760	OG1RF_12297	truA	tRNA pseudouridine(38-40) synthase TruA	4	3	3.38262e-05	1.54738e-05	-1.12831	1.42608
A0A125WAF8	OG1RF_RS03430	OG1RF_10660	HMPREF9498_00151	helicase	2	2	3.39095e-07	1.55042e-07	-1.12902	0.330662
A0A125W7R6	OG1RF_RS11325	OG1RF_12208	HMPREF9498_00965	glycosyltransferase	3	2	7.63395e-07	3.4758e-07	-1.13509	0.500983
A0A125W2I2	OG1RF_RS10325	OG1RF_12018	HMPREF9498_02737	glycerate kinase	4	4	8.03137e-05	3.60517e-05	-1.15558	0.92477
A0A125W378	OG1RF_RS11950	OG1RF_12333	mreC	rod shape-determining protein MreC	4	4	1.39063e-05	6.16046e-06	-1.17463	0.963501
A0A125W8A6	OG1RF_RS05170	OG1RF_10994	ade	adenine deaminase	4	4	3.663e-05	1.60424e-05	-1.19114	0.510443
A0A125W546	OG1RF_RS02545	OG1RF_10479	HMPREF9498_01924	L-cystine transporter	4	4	0.000120316	5.13165e-05	-1.22933	1.0522
A0A125W8F0	OG1RF_RS04540	OG1RF_10867	HMPREF9498_00934	DUF805 domain-containing protein	3	3	5.21738e-06	2.22197e-06	-1.23148	0.733336
A0A125W7I4	OG1RF_RS00465	OG1RF_10093	sdaAB	L-serine ammonia-lyase, iron-sulfur-dependent, subunit beta	4	1	1.45725e-05	6.1486e-06	-1.24492	0.554197
A0A125W2S8	OG1RF_RS10175	OG1RF_11990	atpF	ATP synthase subunit B	3	2	1.36949e-06	5.64703e-07	-1.27807	0.37738
A0A125W3B9	OG1RF_RS12195	OG1RF_12380	rpmB	50S ribosomal protein L28	4	4	1.11083e-05	4.3365e-06	-1.35704	0.551778
A0A125W8I3	OG1RF_RS01820	OG1RF_10334	menH	2-succinyl-6-hydroxy-2, 4-cyclohexadiene-1-carboxylate synthase	3	3	5.71807e-06	2.21994e-06	-1.36501	0.646108
A0A125WA27	OG1RF_RS03750	OG1RF_10724	HMPREF9498_00215	cell division protein FtsI	3	4	7.14151e-06	2.75667e-06	-1.3733	0.611592
A0A125WAH9	OG1RF_RS12680	OG1RF_12485	HMPREF9498_00008	phosphatidylglycerol--membrane-oligosaccharide glycerophosphotransferase	4	4	6.43904e-06	2.45514e-06	-1.39104	0.846589
A0A125W2C1	OG1RF_RS09710	OG1RF_11898	HMPREF9498_02867	hypothetical protein	4	4	3.10193e-06	1.16714e-06	-1.41019	0.481961
A0A125W8A1	OG1RF_RS05165	OG1RF_10993	HMPREF9498_00798	ABC transporter substrate-binding protein	2	2	1.18743e-06	4.40902e-07	-1.42931	0.418739
A0A125W448	OG1RF_RS02755	OG1RF_10522	HMPREF9498_02266	ABC transporter ATP-binding protein	3	4	2.78673e-06	1.0241e-06	-1.44422	0.609053
A0A125W4S6	OG1RF_RS02710	OG1RF_10513	HMPREF9498_02278	cold-shock protein	4	4	3.71543e-05	1.35713e-05	-1.45297	1.7356
A0A125W6A9			HMPREF9498_01549		4	3	4.72407e-05	1.64969e-05	-1.51783	2.43525
A0A125WA31	OG1RF_RS03090	OG1RF_10590	HMPREF9498_00082	APC family permease	2	1	1.97387e-07	6.87292e-08	-1.52203	0.397506
A0A125W6V0	OG1RF_RS01305	OG1RF_10232	HMPREF9498_01286	cysteine synthase family protein	4	4	4.4045e-05	1.42602e-05	-1.62698	1.78778
A0A125W8W5	OG1RF_RS01990	OG1RF_10368	HMPREF9498_00347	amino acid permease	4	3	3.67795e-05	1.16709e-05	-1.65599	0.858762
A0A125W3A3	OG1RF_RS12200	OG1RF_12381	HMPREF9498_02668	thiamine diphosphokinase	4	4	1.19532e-05	3.52889e-06	-1.76011	1.34979
A0A125W1S4	OG1RF_RS06180	OG1RF_11192	mutS2	endonuclease MutS2	4	4	0.000122384	3.60023e-05	-1.76525	0.656488
A0A125W481	OG1RF_RS08770	OG1RF_11710	HMPREF9498_02315	O-antigen ligase domain-containing protein	3	2	5.06348e-06	1.40241e-06	-1.85222	0.820982
A0A125W3T2	OG1RF_RS08785	OG1RF_11713	HMPREF9498_02312	CDP-glycerol glycerophosphotransferase	3	1	1.57185e-06	4.17525e-07	-1.91253	0.845066
A0A125W6Y1; A0A125W6C4	OG1RF_RS01215	OG1RF_10215		6-phospho-beta-glucosidase	3	1	1.21112e-05	3.16113e-06	-1.93782	0.880937
A0A125WAA1	OG1RF_RS03135	OG1RF_10600	HMPREF9498_00091	calcium-translocating P-type ATPase, PMCA-type	3	3	2.92768e-06	7.30501e-07	-2.0028	0.610976
A0A125W9D7	OG1RF_RS11140	OG1RF_12177	yqeG	YqeG family HAD IIIA-type phosphatase	2	1	1.54036e-05	3.36203e-06	-2.19586	0.325586
A0A125W3R9	OG1RF_RS08665	OG1RF_11689	HMPREF9498_02338	hypothetical protein	4	1	6.38042e-06	1.36884e-06	-2.2207	1.3977
A0A125W6D1	OG1RF_RS07465	OG1RF_11450	HMPREF9498_01684	penicillin-binding protein	3	3	3.10795e-06	6.4588e-07	-2.26663	0.706479
A0A125W3G5	OG1RF_RS10015	OG1RF_11958	HMPREF9498_02798	YgeY family selenium metabolism-linked hydrolase	3	1	2.15612e-07	4.36272e-08	-2.30514	0.89114
A0A125W7C0	OG1RF_RS00685	OG1RF_10136	HMPREF9498_01198	ferrichrome ABC transporter substrate-binding protein	4	4	1.92847e-05	3.76915e-06	-2.35515	1.08615
A0A125W9U7	OG1RF_RS03080	OG1RF_10588	pip	YhgE/Pip domain-containing protein	3	3	2.92955e-06	5.65993e-07	-2.37182	0.679134
A0A125W6F1	OG1RF_RS07785	OG1RF_11516	lacD	tagatose-bisphosphate aldolase	4	2	1.71541e-06	3.11595e-07	-2.46081	1.87559
A0A125W2R5	OG1RF_RS09855	OG1RF_11926	HMPREF9498_02833	XRE family transcriptional regulator	4	4	1.20664e-05	2.17942e-06	-2.46898	0.775919
A0A125W244	OG1RF_RS05815	OG1RF_11121	HMPREF9498_03266	hypothetical protein	3	1	7.75403e-07	1.39488e-07	-2.4748	1.11985
A0A125W1A3	OG1RF_RS07040	OG1RF_11364	dprA	DNA-protecting protein DprA	4	1	7.43488e-06	1.06844e-06	-2.7988	0.781878
A0A125W827	OG1RF_RS04595	OG1RF_10878	HMPREF9498_00918	adhesin	3	1	7.09197e-08	9.87691e-09	-2.84406	0.841359
A0A125W8D6	OG1RF_RS01780	OG1RF_10326	dtpT	peptide MFS transporter	2	1	1.36762e-06	1.53656e-07	-3.1539	0.611744
A0A125WA41	OG1RF_RS03140	OG1RF_10601	kup	potassium transporter Kup	2	1	1.64555e-06	1.5345e-07	-3.42273	0.667929
A0A125W8A3	OG1RF_RS04770	OG1RF_10913	HMPREF9498_00883	mechanosensitive ion channel family protein	2	1	2.81619e-06	2.59337e-07	-3.44084	0.66762
A0A125W445	OG1RF_RS08795	OG1RF_11715	HMPREF9498_02310	glycosyltransferase family 2 protein	2	2	3.14795e-06	1.81e-07	-4.12035	0.63575
A0A125W452	OG1RF_RS08610	OG1RF_11679	fimA	metal ABC transporter substrate-binding protein	3	2	4.48185e-06	6.91418e-08	-6.01839	1.16225
a NCBI and BioCyc database locus tags
b KEGG database locus tags
c NCBI annotated functions
