# Supplementary material for: Metabolic and Structural Insights into Hydrogen Sulfide Mis-Regulation in Enterococcus faecalis
Source: Antioxidants (Basel). 2022 Aug 19;11(8):1607. doi: 10.3390/antiox11081607 (PMC9405070; doi:10.3390/antiox11081607)
Supplement: Supplementary file 1 [file antioxidants-11-01607-s001.zip › Supplemental Table S2_walsh.xlsx]

## Sheet: Protein S-sulfuration
Cys Peptide	Cys #	UniProtID	Locus Taga	Gene Nameb	Function	σR	SSH Peptide log2 (WT+Na2S/WT)c	-log p Persulfide Change	Protein Abundance log2 (WT+Na2S/WT)d	-log p Abundance Change	log2_Change in SSH peptide normalized to protein abundance (WT+Na2S/WT)
FTEFTNSDSYCHPEGKDSVRG	C89	A0A125W3C8	OG1RF_12473	HMPREF9498_02578	tRNA-dihydrouridine synthase	1	9.99203	-	0.259936	-	9.73209
FASEKYVLNYCHLYDVPTSAV	C160	A0A125W3M0	OG1RF_11707	HMPREF9498_02319	epimerase	1	9.61189	-	-0.375149	1.68962	9.98704
RDQERYLFSDCAINVNPTAQE	C182	A0A125W9E0	OG1RF_10676	pta	phosphate acetyltransferase	1	9.25481	-	-0.278214	1.76684	9.53302
MEMIPNRYPICYIDYVDEIIP	C21	A0A125W709	OG1RF_10227	fabN	beta-hydroxyacyl-ACP dehydratase	1	9.01881	-	0.728551	3.20987	8.29026
TNINNQLQLACKSSQRSVADV IQKRATKVIRCFVEVNITGEE	C17,C118	A0A125WAN3	OG1RF_10731	HMPREF9498_00222	YggS family pyridoxal phosphate-dependent enzyme	1	8.9739	-	0.276937	-	8.69696
EKEIQLLKEACQALGVPVELT	C396	A0A125W5F7	OG1RF_11436	fhs	formate--tetrahydrofolate ligase	1	8.96584	-	-0.0542091	-	9.02005
LDKSTEYIVSCHSGLRSYIAE	C508	A0A125W8C8	OG1RF_12271	coaP	CoA-disulfide reductase	1	8.96213	-	6.1121	3.00882	2.85004
PSMNLLREGTCVLEAWIPYEK	C177	A0A125W2T5	OG1RF_11796	purK	5-(carboxyamino)imidazole ribonucleotide synthase	1	8.02509	-	0.223249	-	7.80184
LHTQLADEAICIGPAKATDSY	C50	A0A125W9A5	OG1RF_12180	accC	acetyl-CoA carboxylase biotin carboxylase subunit	1	8.02118	-	0.799991	2.6633	7.22119
EAGIVSIADTCEAAVRAMDHP	C650	A0A125W274	OG1RF_11845	HMPREF9498_02921	HDIG domain-containing protein	1	7.26853	-	-0.53403	-	7.80256
TEPSVEVDVSCFKCGGAGCNV	C268	A0A125W8C3	OG1RF_10893	pheS	phenylalanine--tRNA ligase subunit alpha	1	7.19217	-	1.00766	3.05516	6.18451
IQKMIDEEKECIDVITQLSAV GMIVAENLKHCFENPEKDPKE	C32,C61	A0A125W8Z4	OG1RF_12273	cstR	metal-sensitive transcriptional regulator	1	7.04378	-	0	-	7.04378
ITFVNTAGAYCGIGAEERGEG	C114	A0A125W9M1	OG1RF_12178	accA	acetyl-CoA carboxylase carboxyl transferase subunit alpha	1	6.58754	-	0.583944	-	6.0036
HDGEKPTFIPCDSASDYLKAI	C622	A0A125WAF8	OG1RF_10660	HMPREF9498_00151	helicase	1	6.4129	-	-1.12858	-	7.54148
DDDFVKNLVSCSTHDTLLFFT	C551	A0A125W7J4	OG1RF_10006	gyrA	DNA gyrase subunit A	1	6.36344	-	0.748803	2.18657	5.61464
KLGHQATLIGCLGSDTDANYL	C383	A0A125W9G3	OG1RF_11586	rbsK	LacI family DNA-binding transcriptional regulator	1	5.77041	-	0	-	5.77041
HNRADLTPNLCALYVEPTFRH	C83	A0A125WA65	OG1RF_10591	HMPREF9498_00083	N-acetyltransferase	1	5.73303	-	0	-	5.73303
GAESLVNRMLCAEGSIEASHL	C258	A0A125W7M8	OG1RF_10012	dnaB	replicative DNA helicase	1	5.51287	-	2.89081	-	2.62206
YVEAGVLEEECRLLLVQFFKK	C146	A0A125W466	OG1RF_11746	tadA	nucleoside deaminase	1	5.27174	-	0	-	5.27174
QAIASALIELCEQKDFRKISV	C19	A0A125W3K7	OG1RF_12330	HMPREF9498_02537	TetR family transcriptional regulator	1	5.00918	-	0	-	5.00918
WYDTADQVVECKYCHSKQAFI	C26	A0A125WAB5	OG1RF_12484	HMPREF9498_00007	hypothetical protein	1	4.95521	-	8.70543	-	-3.75022
QRSKKALWIACGEGTVLQIDR	C274	A0A125W3C0	OG1RF_12387	fmt	methionyl-tRNA formyltransferase	1	4.94652	-	0.772405	4.00474	4.17412
TSVLTRAIKTCNYLLEYSDQL	C65	A0A125W6Z6	OG1RF_10141	gpmA	2,3-bisphosphoglycerate-dependent phosphoglycerate mutase	1	4.68278	-	-0.209911	-	4.89269
WILWSKVLVACLPAAVIGLKF	C107	A0A125W2R2	OG1RF_11870	uppP	undecaprenyl-diphosphatase	1	3.94435	-	0	-	3.94435
DKEGGIDIEECAFVSEKLSEK	C80	A0A125W900	OG1RF_11038	rimP	ribosome maturation factor	0.994443	6.54287	0.709324	0.401447	-	6.14142
CPHMKLTVLGCLGAYPYKGEG	C22	A0A125W732	OG1RF_12106	HMPREF9498_01358	hypothetical protein	0.991145	6.04885	0.655749	-0.300018	-	6.34887
LLRENWGSDDCAIACCVSATV NWGSDDCAIACCVSATVMGKD WGSDDCAIACCVSATVMGKDM	C403,C407,C408	A0A125W1H4	OG1RF_11329	pflB	formate C-acetyltransferase	0.940576	3.97649	0.671374	0.245086	2.00784	3.7314
SGSGKSTFLRCLNQLEEASSG	C49	A0A125W5A7	OG1RF_10495	HMPREF9498_01940	amino acid ABC transporter ATP-binding protein	0.913516	3.36226	0.928261	-0.330885	-	3.69315
TRGQTQALSVCTLAPLGEHQI	C358	A0A125W3P4	OG1RF_12334	pnp	polyribonucleotide nucleotidyltransferase	0.913083	3.39029	1.51023	-0.163431	-	3.55372
MVATGIDYLACGIGNIHGQYP	C172	A0A125W8Q1	OG1RF_10945	fba	fructose-1,6-bisphosphate aldolase, class II	0.897072	3.12267	0.610716	-0.270498	1.90479	3.39317
RFKKGGRLIYCGAGTSGRLGA	C68	A0A125W8H2	OG1RF_10344	murQ	N-acetylmuramic acid 6-phosphate etherase	0.896417	1.99446	0.68736	0	-	1.99446
LEEHGTVSEACAKEMAEKARQ AEQRSDLIVLCGGLGPTEDDL	C341,C74	A0A125W367	OG1RF_12440	cinA	damage-inducible protein A	0.893632	3.05315	0.79215	3.33405	2.84015	-0.2809
IDLSGKIFGVCGSGDTFYDDF GSGDTFYDDFCKSVDDFEAVF	C88,C99	A0A125W3F4	OG1RF_11741	HMPREF9498_02482	flavodoxin	0.881813	2.67549	0.75388	-0.256572	-	2.93207
NMDGDLIVLHCLPAFHDTKTQ	C288	A0A125W7G9	OG1RF_10100	argF	ornithine carbamoyltransferase	0.858977	2.60477	0.819972	-0.0731312	-	2.6779
CMTRVPHVKTCTPEFTILEAA	C172	A0A125W5L9	OG1RF_10758	HMPREF9498_01780	transcriptional regulator	0.857668	2.59116	1.9221	0	-	2.59116
NLLAARFKNLCVVGDADQSIY	C285	A0A125W5C0	OG1RF_10458	pcrA	DNA helicase PcrA	0.848227	2.41645	0.529085	1.19323	1.79747	1.22322
LGEVVGYGANCDAYHMTSPTP	C262	A0A125W988	OG1RF_12183	fabF	beta-ketoacyl-[acyl-carrier-protein] synthase II	0.847084	2.46837	1.05754	-0.321131	1.95587	2.7895
ILTGAGDQAFCSGGDQKVRGN HKKAKEVWFMCKQYSAQEALD	C88,C191	A0A125W8G8	OG1RF_10330	menB	1,4-dihydroxy-2-naphthoyl-CoA synthase	0.832887	2.31023	0.66601	0.0586268	-	2.25161
IKGKTVIGEDCLIGAHSEIVD ATLGKDINVGCGVVFVNYDGK	C294,C383	A0A125W724	OG1RF_10055	glmU	bifunctional UDP-N-acetylglucosamine diphosphorylase/glucosamine-1-phosphate N-acetyltransferase GlmU	0.821849	2.20577	0.793254	0.581835	-	1.62393
GKSSVTIAIGCTGGQHRSVAL	C290	A0A125W550	OG1RF_10500	HMPREF9498_01945	RNase adaptor protein RapZ	0.816826	2.12974	1.41459	0.865118	1.43072	1.26463
PLNTPIYSEICTELRNRLEND	C234	A0A125W3R9	OG1RF_11689	HMPREF9498_02338	hypothetical protein	0.814037	2.11978	1.49796	-2.22113	1.39807	4.34091
ILAKQLNYVYCDTGAMYRAIT	C32	A0A125W1M6	OG1RF_11266	cmk	cytidylate kinase	0.807743	2.04465	0.568169	0.368993	2.22598	1.67566
WAERLEQAGICHYGVETFNQH	C102	A0A125W3R1	OG1RF_10397	HMPREF9498_02365	ring-cleaving dioxygenase	0.794244	1.9491	0.62226	0.532655	-	1.41644
LTQKMLSEDICSQSVLSRIEN	C27	A0A125W1S7	OG1RF_11087	HMPREF9498_03291	XRE family transcriptional regulator	0.791089	1.82895	0.351579	0	-	1.82895
SGSGKSTFLRCLNLLETPTGG	C46	A0A125WAB9	OG1RF_10620	HMPREF9498_00111	amino acid ABC transporter ATP-binding protein	0.790052	1.88226	0.575765	0	-	1.88226
MKELALENIPCLTVYNKRDQV	C310	A0A125W4I3	OG1RF_11703	hflX	GTPase HflX	0.780488	1.78046	0.912083	0	-	1.78046
PALEAGHLVLCDRFVDSSLAY	C95	A0A125W6S5	OG1RF_12125	tmk	thymidylate kinase	0.775297	1.78673	1.11694	0	-	1.78673
GIGYTFTPDGCVQKK------ SKLEENPKEPCYLRTVWGIGY	C236,C219	A0A125W7D4	OG1RF_12574	HMPREF9498_01040	DNA-binding response regulator	0.771457	1.74425	0.771927	0	-	1.74425
DPDVEGVLPICVGKGTKVIEY TASGGLQAAQCLTLEEVAKQM	C48,C212	A0A125W235	OG1RF_11064	truB	tRNA pseudouridine(55) synthase TruB	0.767424	1.71965	0.780039	8.87838	-	-7.15873
EAVAALGAKICGIDLIIPDKD	C697	A0A125W310	OG1RF_12357	gshAB	bifunctional glutamate--cysteine ligase/glutathione synthetase	0.762951	1.67918	0.796031	0.230602	-	1.44857
GDTVKTGDVVCIVEAMKLMNE	C119	A0A125W8J8	OG1RF_12182	accB	acetyl-CoA carboxylase biotin carboxyl carrier protein	0.76172	1.6766	0.758253	-0.487852	3.29293	2.16445
LSILEDSGYRCVPILDESGKI TLPAGTTAETCTAIVEHLERK	C36,C189	A0A125W6N7	OG1RF_12095	HMPREF9498_01369	CBS domain-containing protein	0.761215	1.67259	0.772363	1.17832	-	0.494273
RMAELAYEDQCTTANPKEPLI VSKSFDNGMICASEQAVIVDK IAKPEKTQFVCIPTTSGTGSE NEMIPSLTLGCGSYGKNSVSK MEIAEPVGVVCGVTPTTNPTS MENVERVMLVCDPGMVQFGYA	C844,C258,C602,C431,C120,C493	A0A125WA32	OG1RF_10627	HMPREF9498_00118	bifunctional acetaldehyde-CoA/alcohol dehydrogenase	0.760354	1.66577	1.18123	0.976432	3.69129	0.689336
LINQKLFDFECDAYHDGEFTR QFVAEHGDKVCPANWQPGEET	C13,C166	A0A125W6S0	OG1RF_12103	ahpC	peroxiredoxin	0.758904	1.65431	1.07364	1.10332	2.3307	0.550989
NEDKKLTIEACVEKLKNVTFH	C341	A0A125W1Z5	OG1RF_11839	glyS	glycine--tRNA ligase subunit beta	0.747293	1.56421	0.865653	0.0371786	-	1.52703
NGDREADFINCVIWRKPAETM	C51	A0A125W7L7	OG1RF_10008	HMPREF9498_01054	single-stranded DNA-binding protein	0.741289	1.5187	1.16148	0.274268	1.96867	1.24443
PDVERSLTETCELIEQTLHTR	C19	A0A125W3H0	OG1RF_11662	HMPREF9498_02386	polyprenyl synthetase family protein	0.734592	1.4596	0.502736	1.40879	-	0.0508076
TEAPISPCGACRQVMAEFFDP IENASFGLTNCAERTAIFKAI AGNTEAPISPCGACRQVMAEF	C113,C77,C110	A0A125W6M9	OG1RF_10123	cdd	cytidine deaminase	0.720938	1.35413	0.436419	-0.595529	2.15127	1.94966
GRADLHAVFECYFREMPFNHG FMAYAKTHRDCVFLVDTYDTL QKYPVDLSTDCWNHKMNLLEK	C39,C228,C468	A0A125W2H9	OG1RF_12001	pncB	nicotinate phosphoribosyltransferase	0.717414	1.34411	0.800677	1.45173	3.81594	-0.107613
IVFTPTILNYCQRLNPKMGNY	C206	A0A125W2Y5	OG1RF_11966	HMPREF9498_02789	inosine-uridine preferring nucleoside hydrolase	0.715725	1.32528	0.652465	0.427144	-	0.898133
GLVKRQFRYICIDPYANAFNE	C100	A0A125W5U1	OG1RF_11419	HMPREF9498_01652	metal-independent alpha-mannosidase	0.713322	1.31036	0.567728	-0.813658	3.47409	2.12402
FDKFEKEAKRCIEESLVHPAY VHPAYDYILKCSHTFNLLDAR	C238,C254	A0A125W280	OG1RF_11840	glyQ	glycine--tRNA ligase subunit alpha	0.711897	1.30508	0.78375	0.0621081	-	1.24298
ETDYNVARRICGHAEAQLTEK	C19	A0A125W8V1	OG1RF_12264	HMPREF9498_00593	histidine phosphatase family protein	0.711653	1.28515	0.64864	-0.319721	-	1.60487
PANTGNIARTCAATNTPLHLI	C23	A0A125W366	OG1RF_12035	HMPREF9498_02718	tRNA (uridine(34)/cytosine(34)/5- carboxymethylaminomethyluridine(34)-2'-O)- methyltransferase TrmL	0.711142	1.29936	0.925259	1.13472	2.80358	0.164646
YELKELVESLCIHREKSTSYP	C91	A0A125W2N2	OG1RF_12040	nadK	NAD(+) kinase	0.711077	1.28027	0.606679	2.78691	1.76515	-1.50664
AITPGQRVLICDDLLATGGTI GPEARGFIVGCPVAYELGVGF	C117,C64	A0A125W678	OG1RF_11400	apt	adenine phosphoribosyltransferase	0.709262	1.2866	0.833243	-0.223855	1.37452	1.51045
YQVLKEEDIACDVVSGGELFT NRENHLEIGGCDTVKLAQKFG	C89,C25	A0A125W1P3	OG1RF_11221	lysA	diaminopimelate decarboxylase	0.705153	1.25797	1.03986	0.240749	-	1.01722
DFYAFSGHKMCGPTGIGVLYG	C227	A0A125W2A1	OG1RF_11827	sufS	cysteine desulfurase	0.701509	1.23278	0.690875	0.987081	2.12279	0.245697
RSGFTIGNIDCTILAEEPKMS	C97	A0A125W7Q9	OG1RF_10041	ispF	2-C-methyl-D-erythritol 2,4-cyclodiphosphate synthase	0.700112	1.22015	0.451229	0.5199	-	0.70025
KKIAKNPYYDCSISVAASPAQ	C252	A0A125W1M4	OG1RF_11156	HMPREF9498_03229	hypothetical protein	0.699516	1.21544	0.874545	0.66999	-	0.545449
SHDRHFLNKVCTHMADLDFSK	C219	A0A125W7H8	OG1RF_10016	HMPREF9498_01061	ABC-F family ATPase	0.697813	1.19232	0.33679	1.21607	4.36844	-0.02375
KKIYAATYDDCHDADLVVLTA	C151	A0A125W8L5	OG1RF_10199	ldh	L-lactate dehydrogenase	0.686764	1.13256	0.632147	-0.0820751	-	1.21464
STAVPAASVVCEAVVATEVAK	C350	A0A125W192	OG1RF_11283	aroC	chorismate synthase	0.6828	1.10607	0.911976	1.5339	-	-0.427832
KGPSQTIVTACASATNAIGEA YGEIVGYGSNCDASHMTAPLK TVGYQVADPDCDLDYVTEGAR	C162,C262,C373	A0A125W6D5	OG1RF_10226	fabF	beta-ketoacyl-[acyl-carrier-protein] synthase II	0.677486	1.07083	0.630857	0.219168	-	0.851663
NLSFDKGEFICFIGTSGSGKT	C35	A0A125W965	OG1RF_10595	proV	glycine/betaine ABC transporter ATP-binding protein	0.674903	1.03866	0.430958	0.619768	1.60054	0.418895
LRGEESFGMICSAKELRLPNA	C173	A0A125W377	OG1RF_12306	HMPREF9498_02566	DUF4479 domain-containing protein	0.674312	1.04992	0.528209	0.393979	-	0.655944
KSKYIEFLPECLRLLPVGGVL	C185	A0A125W6P4	OG1RF_12104	HMPREF9498_01360	O-methyltransferase	0.673473	1.04442	0.743189	0	-	1.04442
VETGRTILSACILEIDDQTGQ	C238	A0A125W2V7	OG1RF_12437	HMPREF9498_02615	TIGR00282 family metallophosphoesterase	0.671574	1.02498	0.712724	8.06007	-	-7.03509
QILSKETNYTCYEK------- GARRAEIIFLCSPVKATLVQL	C365,C73	A0A125W1I2	OG1RF_11284	HMPREF9498_03100	prephenate dehydrogenase	0.671351	1.03052	0.836132	0	-	1.03052
DVKEVKLGFECGAMIENFNDL KVSKVGTIAGCYVTEGFIRRD	C772,C726	A0A125W8P1	OG1RF_11043	infB	translation initiation factor IF-2	0.671146	1.02918	0.698625	0.319754	-	0.709426
TLKTSKGNYPCISSSIPPHLL FNPDIFFAVDCSAADDIHTKK NGVPSTVIGVCGRYIHTHQTM	C113,C237,C316	A0A125W3M1	OG1RF_12309	pepA	glutamyl aminopeptidase	0.669247	1.01678	0.582867	-0.23033	2.51783	1.24711
KDGDLIKVDMCVDLKGAISDS IGYEGYKYATCCSINDEICHG GYEGYKYATCCSINDEICHGF ATCCSINDEICHGFPRKKVLK TAYTEDGGLSCQYEHSLAITK VDLKGAISDSCWSYVVGESTP	C96,C68,C69,C76,C229,C107	A0A125W3D9	OG1RF_11740	map	type I methionyl aminopeptidase	0.668846	1.01417	0.621877	1.01128	3.66707	0.00289005
AIAKKPKLLLCDEPTGALDYE	C162	A0A125W2I7	OG1RF_11091	HMPREF9498_03287	ABC transporter ATP-binding protein	0.66677	0.997517	0.407112	-0.826689	4.45118	1.82421
---MKVVVVGCTHAGTSAVKS	C8	A0A125W163	OG1RF_11305	nox	NADH oxidase	0.662928	0.975795	0.555815	0.409849	1.87691	0.565946
IETHQPDMVICVGQAGGRQTV	C68	A0A125W532	OG1RF_10287	pcp	pyroglutamyl-peptidase I	0.661277	0.965149	0.47488	-0.322644	1.78219	1.28779
VEILNKDLVICSVAEGATFHA	C126	A0A125W797	OG1RF_10177	rpoA	DNA-directed RNA polymerase subunit alpha	0.66105	0.963687	0.614347	0.516134	2.74153	0.447553
VSSYIIRQAPCDVLIVHSEEK	C141	A0A125W3B3	OG1RF_12307	HMPREF9498_02559	universal stress protein	0.654661	0.916902	0.353113	0.10538	-	0.811522
---MAKRTTYCGNVSAEFIEK	C8	A0A125W9S5	OG1RF_11632	aspS	aspartate--tRNA ligase	0.650405	0.895657	0.483726	1.17987	4.17032	-0.284216
TAVFENYGGVCTDQRVQELEA	C75	A0A125W9T4	OG1RF_10623	HMPREF9498_00114	oxidoreductase	0.649976	0.8885	0.252257	0	-	0.8885
HGSEFVEIHPCEGFKIEIFQE	C51	A0A125W206	OG1RF_11278	HMPREF9498_03105	hypothetical protein	0.648795	0.88545	0.434749	0.127807	-	0.757643
AVEVDERITYCFDIPEERRLD	C232	A0A125W2G8	OG1RF_12036	HMPREF9498_02717	methyltransferase domain-containing protein	0.648686	0.881361	0.24471	0	-	0.881361
IEDFSGRKVVCNKPYSGTAVI	C123	A0A125W778	OG1RF_10133	deoB	phosphopentomutase	0.647467	0.867739	0.221738	0.0110095	-	0.85673
QLIEEVLANGCER--------	C256	A0A125W1Z3	OG1RF_11168	HMPREF9498_03216	tRNA (adenine(22)-N(1))-methyltransferase TrmK	0.646611	0.868171	0.536771	0.428407	-	0.439764
VSIMGRNGIPCIGFGPGAEAQ RMTAGETWESCLEEIRNLPAV	C402,C299	A0A125W3G5	OG1RF_11958	HMPREF9498_02798	YgeY family selenium metabolism-linked hydrolase	0.646065	0.86631	0.334572	-2.30507	-	3.17138
DSDQRGLGFACVGLDDIKKSN	C103	A0A125W384	OG1RF_12337	HMPREF9498_02529	Cof-type HAD-IIB family hydrolase	0.643322	0.846414	0.610371	-0.0863039	-	0.932718
VIEREIDGVKCEPFERVQIDT	C391	A0A125W328	OG1RF_11892	typA	translational GTPase TypA	0.642372	0.829623	0.302168	-0.0224977	-	0.85212
GDDYDTPDGTCIRDYVYIEDL	C219	A0A125W8P6	OG1RF_12142	galE	UDP-glucose 4-epimerase GalE	0.642077	0.842781	0.614154	-0.181232	1.9654	1.02401
LIKNDIITISCGGGGIPVVGQ	C188	A0A125W7C1	OG1RF_10101	arcC	carbamate kinase 1	0.639883	0.829339	0.529213	-0.090018	-	0.919357
EDSLAKFAKECHFDNYILLGK	C108	A0A125W341	OG1RF_12365	rnc	ribonuclease 3	0.638927	0.823361	0.450366	1.33998	2.67586	-0.516621
KNADFGDVSGCTLGHEGIGIV LASEPASSITCAGVTTYKAIK	C66,C157	A0A125W650	OG1RF_11533	HMPREF9498_01555	alcohol dehydrogenase AdhP	0.63737	0.813635	0.442242	-0.492658	2.37975	1.30629
LGTRFLIAKECNVHPDYKQKV QEIIDSLMSECKAIVHKMNQR KARDLDAVITCQHFGHPVRTL	C207,C313,C229	A0A125W9J5	OG1RF_12186	HMPREF9498_00448	enoyl-[acyl-carrier-protein] reductase FabK	0.63676	0.809826	0.433185	0.306969	-	0.502857
AAGLAGGSSDCAAALRGLNKL	C106	A0A125W7S0	OG1RF_10050	ispE	4-diphosphocytidyl-2C-methyl-D-erythritol kinase	0.628718	0.759899	0.336681	2.92105	2.98471	-2.16115
NVKKLIRVGTCGSISEKVNVR IAETFLENPVCYNQVRGMLGY	C91,C38	A0A125W6N9	OG1RF_10135	deoD	purine-nucleoside phosphorylase	0.626784	0.747957	0.656403	-0.197516	2.07874	0.945473
LATYVNFPKVCLPELIEKSIY	C118	A0A125W477	OG1RF_12521	HMPREF9498_02122	ImmA/IrrE family metallo-endopeptidase	0.620871	0.697515	0.236665	0	-	0.697515
SFVVLTDTGYCSDHIRGTIEN	C153	A0A125W851	OG1RF_10969	HMPREF9498_00823	MBL fold metallo-hydrolase	0.619649	0.696196	0.259137	0	-	0.696196
SFNLQATISNCSNNYGPYQHI	C185	A0A125W3N7	OG1RF_11732	rfbB	dTDP-glucose 4,6-dehydratase	0.619394	0.70139	0.40149	0.263128	-	0.438262
GHAKVAMPGGCAIGKRPIDLH	C120	A0A125W2K7	OG1RF_11983	murA	UDP-N-acetylglucosamine 1-carboxyvinyltransferase	0.619272	0.701814	0.334748	0.917205	1.71913	-0.215391
LKPLKENHSVCVETFVSGVHH VPETAEEKLICSNYETRRQQR	C82,C150	A0A125W2L3	OG1RF_11875	HMPREF9498_02890	acyl-CoA thioesterase	0.619092	0.700712	0.451341	2.9263	6.15088	-2.22558
TETRHYAHVDCPGHADYVKNM	C82	A0A125W7E3	OG1RF_10147	tuf	elongation factor Tu	0.6148	0.674508	0.493538	0.579158	3.94585	0.0953503
NALKLNPIISCNEEGIYYTVA	C193	A0A125W8M9	OG1RF_10963	HMPREF9498_00830	DegV family protein	0.614212	0.670928	0.40271	0.640806	1.39391	0.0301219
KKGISLAVQGCEHINRALAME	C77	A0A125W9U0	OG1RF_11629	HMPREF9498_00292	TIGR01440 family protein	0.607314	0.624937	0.205784	0.162903	-	0.462034
GVIRGIDMFDCVLPTRIARNG TRAYIRHLIKCDETFGIRLTS	C271,C327	A0A125W9Y8	OG1RF_10624	tgt	tRNA guanosine(34) transglycosylase Tgt	0.606276	0.62279	0.314061	-0.738522	-	1.36131
KLETIHYEVACTFSQRIPREY	C360	A0A125WA82	OG1RF_10579	alr	alanine racemase	0.606155	0.622056	0.30375	-0.185747	-	0.807803
GGTLRLGLYPCKLKKGTKTAA QNTKNKLAQFCDVNPEAVIES	C438,C229	A0A125W7V0	OG1RF_10924	pyrG	CTP synthetase	0.604415	0.611552	0.424777	0.823265	2.64365	-0.211714
HLPALRTFLFCGEELPKPTAE	C271	A0A125W657	OG1RF_12112	dltA	D-alanine--poly(phosphoribitol) ligase subunit 1	0.603155	0.603955	0.369598	0.812522	1.84654	-0.208567
DSAGSISHIECDTIIMDEKSK	C374	A0A125W1Y5	OG1RF_11825	sufB	Fe-S cluster assembly protein SufB	0.601346	0.595482	0.11795	0.477123	3.09865	0.118359
EPIEQLASVRCIPNVHVIRPA	C487	A0A125W175	OG1RF_11300	tkt	transketolase	0.598462	0.574137	0.333273	-0.175055	2.03491	0.749192
APKMGAQSTICAGGRYNGLVE	C285	A0A125W9Q7	OG1RF_11633	hisS	histidine--tRNA ligase	0.595298	0.546924	0.283398	0.915115	4.09424	-0.368192
CGEMKKSHHVCPACGHYDGKD MKKSHHVCPACGHYDGKDVMS	C43,C46	A0A125W510	OG1RF_10781	rpmF	50S ribosomal protein L32	0.595152	0.555881	0.72439	0.373157	-	0.182724
SAHDSGAALLCKHDGVVEFVD PKQVVAVATACIPFLENDDSN	C683,C632	A0A125WAS6	OG1RF_12493	rpoB	DNA-directed RNA polymerase subunit beta	0.594035	0.54919	0.307654	0.472791	3.05407	0.0763991
NDKLSVTLDTCHINDAGYNVK	C172	A0A125W605	OG1RF_11445	nfo	endonuclease	0.588695	0.517311	0.257828	1.47768	2.36116	-0.960365
VPVIETGTGNCHIYVDKDAQL	C229	A0A125W704	OG1RF_10036	proA	gamma-glutamyl-phosphate reductase	0.586283	0.502443	0.271832	-0.196747	-	0.69919
FEDFASDKAICDVGAGAGFPS	C127	A0A125W7L9	OG1RF_12545	gidB	ribosomal RNA small subunit methyltransferase G	0.584802	0.494149	0.279839	8.33689	-	-7.84274
AKKAGIKIVLCNHDFQKTPSQ	C154	A0A125W619	OG1RF_11441	aroD	3-dehydroquinase	0.584683	0.493439	0.180821	-0.402204	-	0.895643
QNVKKAVIVTCFTGEGVAAKL	C691	A0A125WAL0	OG1RF_10743	HMPREF9498_00234	sigma-54-dependent transcriptional regulator	0.577746	0.452327	0.243178	0	-	0.452327
FHQSNSIRVSCAFDVNEDIVG	C91	A0A125W2R6	OG1RF_12010	rex	transcriptional regulator	0.577595	0.451428	0.259191	2.12465	3.07959	-1.67322
DEKLPTLCGRCAHIVEENYPE VGSDEKLPTLCGRCAHIVEEN	C916,C913	A0A125WAB7	OG1RF_10736	ileS	isoleucine--tRNA ligase	0.572793	0.423078	0.206558	0.731957	5.10847	-0.308879
AAKQGAVVVVCARRINLIGKV GGSAGLGEQICYEAAKQGAVV	C35,C22	A0A125W5R1	OG1RF_11403	HMPREF9498_01636	NAD(P)-dependent oxidoreductase	0.572672	0.418369	0.257958	0.627812	-	-0.209443
VYICNECIDLCKEIIDEEFYD AGPGVYICNECIDLCKEIIDE KIVAGPGVYICNECIDLCKEI DDVELQKSNICLIGPTGSGKT	C93,C89,C86,C167	A0A125W9G4	OG1RF_11581	clpX	ATP-dependent Clp protease ATP-binding subunit ClpX	0.572567	0.421748	0.238592	0.660656	2.87854	-0.238908
AIWRFCQKFECEGYTDFKFKL	C62	A0A125W3L3	OG1RF_12320	HMPREF9498_02547	MurR/RpiR family transcriptional regulator	0.571753	0.414979	0.105043	3.35622	2.10146	-2.94124
IRRKGRVMVICPANPKHKQRQ	C27	A0A125W777	OG1RF_10174	rpmJ	50S ribosomal protein L36	0.569933	0.406231	0.175737	0.610272	-	-0.204041
RPEELGEKIVCQGGTFYNEAV GLETIPSDTVCYPAKMAHGHI	C535,C722	A0A125W1S2	OG1RF_11098	HMPREF9498_03278	2-hydroxyglutaryl-CoA dehydratase	0.565112	0.374864	0.108679	8.62496	-	-8.2501
LFNPPKVEGTCDRCGGHEFYQ PPKVEGTCDRCGGHEFYQRED	C165,C168	A0A125W6J6	OG1RF_10172	adk	adenylate kinase	0.563986	0.371285	0.213012	-0.321592	2.58415	0.692877
QLLTNEAVIVCETDKTVKLPE	C182	A0A125W2N6	OG1RF_11884	HMPREF9498_02881	16S rRNA (guanine(966)-N(2))-methyltransferase RsmD	0.563811	0.37026	0.176473	0.563734	-	-0.193475
RIEGVEELHGCRHSIIPDRIE	C226	A0A125W8B6	OG1RF_10946	murA	UDP-N-acetylglucosamine 1-carboxyvinyltransferase	0.563417	0.367945	0.168681	1.3315	5.48609	-0.963551
IFKDKQFTVRCNILDHGITSF	C137	A0A125W5S7	OG1RF_11404	rnz	ribonuclease Z	0.561511	0.36038	0.122119	0.225333	-	0.135047
AQEAQYLATYCQQRELTYYET	C108	A0A125W8W6	OG1RF_10207	tilS	tRNA lysidine(34) synthetase TilS	0.561434	0.353179	0.0861742	0.0519207	-	0.301259
SGLTKEALIACEIAKNRGATV	C197	A0A125W7V1	OG1RF_10343	HMPREF9498_00714	MurR/RpiR family transcriptional regulator	0.557364	0.330365	0.0681507	0	-	0.330365
LAHYNTDGVLCPKCNHILHYK QETIKVGDKECTLVLVKNPVG	C206,C316	A0A125W2Q2	OG1RF_11964	HMPREF9498_02791	DUF1727 domain-containing protein	0.556584	0.327941	0.172155	0.787881	1.35942	-0.45994
HQTENFAELVCSNSLRGNSLT	C52	A0A125W1A6	OG1RF_11361	trmFO	FADH(2)-oxidizing methylenetetrahydrofolate--tRNA-(uracil(54)-C(5))- methyltransferase TrmFO	0.555721	0.322895	0.145865	2.5218	2.66549	-2.19891
DFKYADVVDACDNIQTFKLVV LKHARAYTAVCNPTVNSYKRL DFAPTDLGENCRRDIVLELES SDHGKVARLICDIYNPDGTPF	C215,C296,C175,C101	A0A125W491	OG1RF_11701	glnA	type I glutamate--ammonia ligase	0.551805	0.300031	0.157662	-0.139934	2.2787	0.439966
GVYHLSNENSCSWYQFAKEIL KEIQPSVIYHCAAYTAVDKAE	C234,C76	A0A125W3C2	OG1RF_11731	rfbD	dTDP-4-dehydrorhamnose reductase	0.550946	0.295025	0.13989	0.280353	-	0.014672
TYREISSCSNCEDFQARRALI DQEVVHLQEQCTAIAERLPNL AQKTYREISSCSNCEDFQARR	C356,C97,C353	A0A125W7A2	OG1RF_12537	serS	serine--tRNA ligase	0.549802	0.288351	0.138019	0.664747	4.54678	-0.376396
KTTTTVNLGACLANLGKKVLL	C26	A0A125W7S3	OG1RF_12544	soj	ParA family protein	0.548318	0.279125	0.0602567	0.155458	-	0.123667
FARSFEIKEACYGATAGLQLA	C167	A0A125W2D3	OG1RF_11151	HMPREF9498_03235	hydroxymethylglutaryl-CoA synthase	0.544788	0.259157	0.141985	-0.549551	1.8086	0.808707
LLMILKERQPCLQTEIQEHLK	C49	A0A125W4H8	OG1RF_10289	HMPREF9498_02182	MarR family transcriptional regulator	0.542353	0.249772	0.0883642	0	-	0.249772
IKITLPIIEECVQRKALTHDK LVEAGDLPIICRRLMVIAYED	C225,C276	A0A125W904	OG1RF_11641	HMPREF9498_00280	replication-associated recombination protein A	0.541055	0.237453	0.12031	10.5362	2.57718	-10.2988
SIEAGGTKFVCGVGTDDLTIV	C33	A0A125W8P5	OG1RF_10951	HMPREF9498_00842	fructokinase	0.540485	0.234144	0.108167	0.193855	-	0.0402893
SADANIADEICGVVRSTVEKL	C187	A0A125W9K8	OG1RF_11624	tpiA	triose-phosphate isomerase	0.540452	0.233952	0.0969836	-0.260922	2.25217	0.494874
VTAAVILPKDCQLLGLNDSKK	C100	A0A125W105	OG1RF_11365	rnhB	ribonuclease HII	0.538018	0.184047	0.0407037	5.18069	2.42047	-4.99664
NFLTEEVGEVCRAIRTIEIGR	C39	A0A125WAA9	OG1RF_10709	HMPREF9498_00199	hypothetical protein	0.537527	0.216969	0.103426	0.863618	2.41591	-0.646649
KGIIDISPMGCRTGFYMIMWD EVVPAVSAKECGNYKDHSLFA	C78,C120	A0A125W8A7	OG1RF_10954	luxS	S-ribosylhomocysteine lyase	0.53569	0.206309	0.0723906	0.154432	-	0.0518768
LSENLRFAERCEEEGIIFVGP DTGKIAEAAICYTGDINDPAR PYFDSLLVKVCTHGFSFEQAI RHQKVVEVAPCVSMNEEQRAA	C105,C680,C405,C254	A0A125W2D1	OG1RF_11888	pyc	pyruvate carboxylase	0.531738	0.1834	0.081089	0.381499	2.36706	-0.198099
VRFFYSAATECEIDKQGRINI	C97	A0A125WAM2	OG1RF_10721	mraZ	division/cell wall cluster transcriptional repressor MraZ	0.529488	0.169642	0.0728505	1.70653	1.98513	-1.53688
EYRGYDSAGICVNDQSQQPHV ---------MCGIVGMIGKEN	C35,C2	A0A125W427	OG1RF_11692	glmS	glutamine--fructose-6-phosphate transaminase (isomerizing)	0.526753	0.15453	0.0630171	1.11098	3.9972	-0.956446
KGAPDELLKRCTEILSNGETS VETLGSTDIICSDKTGTLTLN	C456,C334	A0A125W9K4	OG1RF_11602	HMPREF9498_00425	cation-translocating P-type ATPase	0.52483	0.143405	0.0577179	-0.22679	-	0.370195
QVETSISDETCFIRITKDVEQ	C1038	A0A125W5S4	OG1RF_10777	HMPREF9498_01798	DNA polymerase III subunit alpha	0.524588	0.140997	0.0458993	0	-	0.140997
PGYYQEYLTKCGIYPETQPED VSAFQRYAQVCYQAFGDRVKN	C269,C148	A0A125W1E6	OG1RF_11322	HMPREF9498_03063	glycoside hydrolase family 1 protein	0.522526	0.129415	0.0549526	-0.106962	-	0.236377
--MRVNITLECTSCKERNYLT RVNITLECTSCKERNYLTNKN	C9,C12	A0A125W9M2	OG1RF_12157	rpmG	50S ribosomal protein L33	0.522364	0.129146	0.0624482	0.860767	-	-0.731621
IEVSGEEGDDCTQDIFIANKT	C124	A0A125WAL2	OG1RF_12488	HMPREF9498_00011	DNA starvation/stationary phase protection protein	0.519283	0.111335	0.0304171	0.0044769	-	0.106858
QCFEGLKAYQCADGSVNLFRP AEAHEKEFSDCIYLDPYTHTK QVPVETFVSACQEVVKANLAY	C66,C207,C104	A0A125W5J2	OG1RF_11504	ilvE	branched-chain amino acid aminotransferase	0.519087	0.110202	0.0462247	-0.136324	-	0.246526
AVEEGAKAIVCASTGNTSAAA	C80	A0A125W2J5	OG1RF_11852	thrC	threonine synthase	0.518429	0.1064	0.0456997	-0.177778	-	0.284177
MTSYLMEEKKCQVSIVELDKE PRNIQAATEDCLLFNKQLYLN NEKNVHILINCGEEKETELDQ	C48,C964,C247	A0A125W3L1	OG1RF_11725	HMPREF9498_02466	methyltransferase domain-containing protein	0.517795	0.102732	0.0439957	1.4077	2.95901	-1.30496
GRGVSIHRADCPNVQHQEELA IRVIVDSIKDCYAVLGAIHTR	C632,C278	A0A125W9X4	OG1RF_11636	HMPREF9498_00285	bifunctional (p)ppGpp synthetase/guanosine-3',5'-bis(diphosphate) 3'-pyrophosphohydrolase	0.516359	0.0944398	0.0415169	-0.508902	-	0.603342
KSQLAQVLSTCQPGARLCVLF KELPIEVTIACGLPKGDKLEW	C185,C77	A0A125WA44	OG1RF_11637	HMPREF9498_00284	16S rRNA (uracil(1498)-N(3))-methyltransferase	0.510377	0.059891	0.024554	1.97378	1.42663	-1.91389
AKETGVHYHVCHVSTEESVRV	C231	A0A125W5V4	OG1RF_11429	pyrC	dihydroorotase	0.510076	0.0581571	0.0294592	1.94302	2.46946	-1.88486
KITALIGPSGCGKSTYLRSLN	C59	A0A125W641	OG1RF_11467	pstB	phosphate ABC transporter ATP-binding protein	0.509806	0.0560614	0.0124515	0.264476	-	-0.208415
LWGGATAANQCEGGYNEGGRG RKLVGFYENLCRVIFNRYKGL	C18,C160	A0A125W6Y1	OG1RF_10215	HMPREF9498_01268	6-phospho-beta-glucosidase	0.509226	0.0532481	0.0210848	-1.02317	2.49672	1.07641
TYQQGATDSQCNLALKFAEGT IVIPNFWKTDCAYYTDAQGNT GLKIPSEMTICGTKGQIVIPN	C250,C295,C279	A0A125W4H2	OG1RF_10558	HMPREF9498_02230	gfo/Idh/MocA family oxidoreductase	0.507449	0.042991	0.0177306	1.54406	-	-1.50107
ESLLNKVEELCFYFKHDEAYD RTHSSIYSLDCLLYEKAFNKQ LSQAELAKGICTQATISNIEN EFKLDYPLEQCRIYYNTAKFY CLRLDLQVEECIEGSSEKKLE	C81,C231,C27,C190,C61	A0A125W878	OG1RF_10977	HMPREF9498_00814	helix-turn-helix domain-containing protein	0.507259	0.0418928	0.0194041	1.18639	2.61177	-1.1445
RFKITAEDVTCYGQQVLRDFE	C413	A0A125W571	OG1RF_10414	HMPREF9498_01838	phosphoglucomutase	0.506291	0.0363077	0.0159773	-0.0089516	-	0.0452593
EDGQRIDLTLCPLAEKDNWHE	C105	A0A125W939	OG1RF_12165	HMPREF9498_00469	aminoglycoside 6-adenylyltransferase	0.502095	0.0120925	0.00516363	0.578352	-	-0.566259
VEELIVEDGVCRGVVTSTGAA GIVEGVGARYCPSIEDKIVRF	C137,C280	A0A125W832	OG1RF_12556	gidA	tRNA uridine-5-carboxymethylaminomethyl(34) synthesis enzyme MnmG	0.501592	0.00918491	0.0035563	1.48658	4.14382	-1.47739
AKSSGAGGGDCGIVIFRQKSG VIETEALKNLCDLAESYTGAA	C322,C302	A0A125W9Z0	OG1RF_10629	HMPREF9498_00120	phosphomevalonate kinase	0.498975	-0.00591378	0.0024902	3.52491	-	-3.53083
STFLPKNPLNCVPTELHEQRG	C190	A0A125W2X3	OG1RF_11969	HMPREF9498_02786	serine hydrolase	0.495334	-0.0269281	0.0122106	0	-	-0.0269281
LAIWRSEYHHCPVVLGSATPS	C426	A0A125W321	OG1RF_12389	priA	primosomal protein N'	0.494923	-0.0292977	0.0121669	0	-	-0.0292977
SVVFKELIPACDVLYRTMIHE	C110	A0A125W177	OG1RF_11296	folA	trimethoprim-resistant dihydrofolate reductase DfrE	0.494716	-0.0307928	0.0129014	0.0100841	-	-0.0408769
DVKMEEGSMRCDANISLRPYG FGMKAALALNCEISKETHFDR	C192,C68	A0A125W4S9	OG1RF_10463	gatB	Asp-tRNA(Asn)/Glu-tRNA(Gln) amidotransferase GatCAB subunit B	0.494711	-0.0305222	0.00929974	1.48191	4.7681	-1.51243
AQENKTVIEVCTNQSNLSVRE	C327	A0A125W2Y8	OG1RF_12425	HMPREF9498_02624	glycoside hydrolase family 65 protein	0.494245	-0.03321	0.0132394	-0.505961	4.32164	0.472751
HGALTFETQVCPGAERFPLFG	C322	A0A125W5U6	OG1RF_10848	galM	galactose-1-epimerase	0.493365	-0.0316634	0.0100397	-0.188765	-	0.157102
DRPGKRPGGYCTELPETQESR	C368	A0A125W9U1	OG1RF_10392	HMPREF9498_00323	M3B subfamily peptidase	0.493233	-0.0390542	0.0168013	0.256284	-	-0.295338
IEEKVKLLLFCNPHNPGGRVW	C168	A0A125W7V5	OG1RF_12197	HMPREF9498_00954	pyridoxal phosphate-dependent aminotransferase	0.4913	-0.0502085	0.0190699	-0.271268	1.55223	0.221059
LLSAGDTLIVCKLHHLGKTTR	C61	A0A125W719	OG1RF_10142	HMPREF9498_01204	recombinase family protein	0.49114	-0.0511325	0.0179954	0	-	-0.0511325
DKPVGRPCPKCGQYLVEKKVK VKEIGVTCPVCHEGQVIERKS KKVKGGKQVVCINGDYEENVQ KAIVKEIGVTCPVCHEGQVIE	C664,C623,C681,C620	A0A125W1A5	OG1RF_11362	topA	type I DNA topoisomerase	0.490237	-0.0563486	0.0219125	0.869915	3.37251	-0.926264
MKNGAQEVYACASHGLLSEGA	C266	A0A125W457	OG1RF_11676	prs	ribose-phosphate pyrophosphokinase 1	0.489137	-0.0639879	0.0241821	2.63882	1.91332	-2.70281
KKEVEEIVAYCREQGLSWLVL ELKQPLEYPSCGSVFKRPVGH	C52,C220	A0A125W6V6	OG1RF_12097	murB	UDP-N-acetylenolpyruvoylglucosamine reductase	0.488773	-0.0647985	0.0276691	-0.150089	-	0.0852909
NKTERVILTTCSTGIGTAVKI	C698	A0A125W9U8	OG1RF_11617	HMPREF9498_00302	sigma-54-dependent transcriptional regulator	0.488745	-0.0674313	0.0291959	0	4.0865	-0.0674313
PGKVGVRIEDCLHVTKTGSEP	C345	A0A125W615	OG1RF_11454	HMPREF9498_01689	aminopeptidase P family protein	0.487872	-0.0700003	0.0291383	0.14898	-	-0.21898
DPASEDPAKICQEIQAHITKE VTISLFAIRDCLEKEDLLKEF RDVTAETLFFCKGLNFKEIYL SVLVGASKEECQQGIAATTVP	C441,C16,C63,C345	A0A125W464	OG1RF_10399	murE	UDP-N-acetylmuramoyl-L-alanyl-D-glutamate--L- lysine ligase	0.487766	-0.0706163	0.0337905	-0.420574	-	0.349958
ADANVTSIDNCTTRLRLTVKD	C431	A0A125W1N3	OG1RF_11231	nagE	PTS N-acetylglucosamine transporter subunit IIABC	0.487504	-0.0721257	0.0293921	-0.36794	-	0.295814
PGQVGNPLANCHPPKALKNVE	C291	A0A125W8J6	OG1RF_10999	HMPREF9498_00792	NADPH-dependent oxidoreductase	0.485575	-0.0832685	0.0376574	1.90904	2.40468	-1.99231
ENRLEGNEAYCILNEGIGKVL	C690	A0A125W4A6	OG1RF_10271	HMPREF9498_02163	acyl-CoA synthetase FdrA	0.483118	-0.0970016	0.0304107	0	-	-0.0970016
LRTIPGNAAACGSLIEKNYQE	C106	A0A125W9I1	OG1RF_10717	argR	ArgR family transcriptional regulator	0.483091	-0.0976155	0.0261956	0	-	-0.0976155
VGNLRLPLVACTPEEEQRIIR QLEKIVAIKECAGLDAITELI ELIDGRIPIICGVGTNDTRDS	C276,C167,C78	A0A125W8E6	OG1RF_10956	dapA	4-hydroxy-tetrahydrodipicolinate synthase	0.482239	-0.10254	0.0413498	0.468364	-	-0.570903
EKIVATYSKKCIWIVDKSKMV	C113	A0A125W6G6	OG1RF_10143	rpiA	ribose-5-phosphate isomerase	0.482197	-0.105994	0.021588	0.40009	1.96114	-0.506084
NCKHSQDGEPCNVCETCVAIT HSQDGEPCNVCETCVAITEGR DGEPCNVCETCVAITEGRLND	C73,C76,C79	A0A125W696	OG1RF_12140	dnaX	DNA polymerase III subunit gamma/tau	0.4807	-0.111434	0.0409226	2.46294	1.57205	-2.57437
KKRTGEVIGECGLTNQLVKGK	C80	A0A125W8T7	OG1RF_11601	HMPREF9498_00424	N-acetyltransferase	0.479608	-0.117745	0.0471143	1.33623	2.19137	-1.45398
TITNFLRGEDCLSTLAAFRSL	C50	A0A125W184	OG1RF_11285	aroA	3-phosphoshikimate 1-carboxyvinyltransferase	0.478765	-0.122616	0.052732	0.0987474	-	-0.221363
EAGAKDVYASCTHPVLSGPAL	C258	A0A125W3N2	OG1RF_12431	prs	ribose-phosphate pyrophosphokinase	0.47788	-0.127735	0.0500061	1.0469	3.12568	-1.17464
TYAALAMAKLCWENLQEDGLK QEDGLKAKLACDANVVTESLN QNVGQKEQADCIIGLGGGKAI	C216,C231,C87	A0A125W1X3	OG1RF_11146	HMPREF9498_03240	glycerol dehydrogenase	0.477414	-0.130425	0.0562278	0.168769	-	-0.299194
VKREGQLIAACILSKKKVKIG KHLLERRGWHCEYVGVKREGQ GILMDYTDKKCVEAFFTGLKK	C70,C55,C98	A0A125W4A3	OG1RF_11691	HMPREF9498_02336	aminoacyltransferase	0.472444	-0.159184	0.0609084	0.943401	-	-1.10258
VFTNHTTGVVCPSERVIEKLR	C158	A0A125W976	OG1RF_12192	HMPREF9498_00441	glycosyltransferase family 4 protein	0.471931	-0.16215	0.06847	0.368837	-	-0.530988
TDPNIDPVGTCVGPKGQRVQA VIFDPENSKACTVVVPDYQLS	C250,C305	A0A125W8Z9	OG1RF_11040	nusA	transcription termination/antitermination protein NusA	0.470452	-0.170714	0.0727596	0.377197	1.60819	-0.547911
ERGASNIKFVCLVAVPEGVKA	C159	A0A125W316	OG1RF_11931	upp	uracil phosphoribosyltransferase	0.468948	-0.179426	0.0644855	0.695384	3.60294	-0.87481
GQENINSLTHCITRLRFKLKD	C59	A0A125W6V7	OG1RF_10214	HMPREF9498_01267	PTS beta-glucoside transporter subunit EIIBCA	0.467831	-0.151334	0.0284601	0	-	-0.151334
GISSCLGGICCRYDGKSQEQE IGISSCLGGICCRYDGKSQEQ ----MIGISSCLGGICCRYDG TLILKEKSPSCGSQLIYDGQF	C13,C12,C7,C109	A0A125W5S1	OG1RF_11413	HMPREF9498_01646	DUF523 domain-containing protein	0.466591	-0.193084	0.0967408	12.0713	1.85727	-12.2643
VAQFDRLLATCEELPAVAETK LGTKETFATACIAGTIKTGQT	C170,C273	A0A125W8K2	OG1RF_10332	HMPREF9498_00725	isochorismate synthase	0.465753	-0.19794	0.0870724	0.228999	-	-0.42694
RGEMPHYAGTCANLTPSEQAA LSSNRAYKCYCTPEELEAERE QLLSSNRAYKCYCTPEELEAE	C140,C115,C113	A0A125W7Z5	OG1RF_10042	gltX	glutamate--tRNA ligase	0.464247	-0.206676	0.0776993	0.192995	2.0154	-0.399671
KLGERSIVVDCDVIQADGGTR VISFGDTKVICSATVEEKVPP	C117,C40	A0A125W7U5	OG1RF_10900	rph	ribonuclease PH	0.463329	-0.212003	0.0910612	0.987763	2.33823	-1.19977
NAPVFGFTPDCKYPVVYGERG	C173	A0A125W8H9	OG1RF_10934	HMPREF9498_00861	peptidase M20	0.461864	-0.220501	0.0926646	0.156456	-	-0.376956
IDNRERVAITCPITINDIARM	C178	A0A125W7R9	OG1RF_10102	HMPREF9498_01154	Crp/Fnr family transcriptional regulator	0.458882	-0.237821	0.0808541	0	-	-0.237821
VPTLKILIQLCNRLELPLGEL LSQSELAKGICTQVTVSRFEK	C56,C32	A0A125W883	OG1RF_10996	HMPREF9498_00795	XRE family transcriptional regulator	0.458625	-0.239315	0.113561	0	-	-0.239315
IQGETITFDECRYTLINSCFQ	C333	A0A125W1Q1	OG1RF_11220	fbp	fructose-bisphosphatase class III	0.458377	-0.240753	0.125471	0	-	-0.240753
IRRSLSPTGRCVEYSEAIYNT	C212	A0A125W3I8	OG1RF_11658	HMPREF9498_02390	GntR family transcriptional regulator	0.457528	-0.248196	0.104661	0.224415	-	-0.472611
--------MTCISLSILNQEQ ELTITGKDFVCLAARDCQLQD	C3,C38	A0A125W2C6	OG1RF_11779	HMPREF9498_02985	hypothetical protein	0.456492	-0.2406	0.0867433	0.235685	-	-0.476285
GFDCTCGKRGCLETVSSATGV	C183	A0A125W6U2	OG1RF_12147	HMPREF9498_01469	glucokinase	0.455034	-0.260193	0.117074	0.0529677	-	-0.31316
PGTHPETCHKCHGSGTINVER	C175	A0A125W2J9	OG1RF_11080	dnaJ	molecular chaperone DnaJ	0.454726	-0.258982	0.0873482	0.914293	2.40223	-1.17327
LQKAIGDQLTCIFVDHGLLRK GFEKVGTSNDCPIASIEDANR	C252,C158	A0A125W7A0	OG1RF_10115	guaA	GMP synthase (glutamine-hydrolyzing)	0.454283	-0.264563	0.108985	0.614518	4.302	-0.879081
AEKAGLDGVVCSALEARGIQE	C161	A0A125W5U3	OG1RF_11424	pyrF	orotidine-5'-phosphate decarboxylase	0.453403	-0.269686	0.09603	2.22345	2.09817	-2.49314
EPKTQTLPDFCQAYKIMTTKE TIDLGDFSDRCHPLTEATDGR GFRGKIFGELCYDGIRFERNS	C119,C52,C388	A0A125W8C2	OG1RF_10958	HMPREF9498_00835	multifunctional 2',3'-cyclic-nucleotide 2'-phosphodiesterase/5'-nucleotidase/3'-nucleotidase	0.451621	-0.280059	0.119864	0.324836	-	-0.604895
NKVTEEGAPPCYVAVDENRQL DLTPDQRLVVCDLGTDRVYTY	C100,C169	A0A125W9U6	OG1RF_11582	HMPREF9498_00408	lactonase family protein	0.449241	-0.293934	0.126025	-0.197703	1.52076	-0.096231
IVTQENTSDLCHQVAKQLLEK	C29	A0A125W9L2	OG1RF_12188	fabHA	3-oxoacyl-ACP synthase III	0.445193	-0.317556	0.199098	2.37271	2.5791	-2.69026
LIEQGYKVAICEQVEDPKTTK	C90	A0A125W2W4	OG1RF_12435	mutS	DNA mismatch repair protein MutS	0.444147	-0.324361	0.147382	0.669145	1.34877	-0.993506
NKCIVNSRSECDTTVTLGKHS	C24	A0A125W2J6	OG1RF_11860	guaC	GMP reductase	0.441958	-0.339075	0.138373	0.0218871	-	-0.360962
TANTSYLERFCNPEELVISRE	C777	A0A125W4J6	OG1RF_12231	valS	valine--tRNA ligase	0.440231	-0.346572	0.147841	1.37259	4.97882	-1.71916
AILYPPKGLNCLITGPTGSGK NWKTRAIIAICASGEGTARRM	C149,C734	A0A125W7K7	OG1RF_10017	HMPREF9498_01062	sigma-54-dependent transcriptional regulator	0.438484	-0.356805	0.135136	0	-	-0.356805
SGSGKSTLLRCINLLEKPTDG	C49	A0A125W8P2	OG1RF_10190	HMPREF9498_00635	amino acid ABC transporter ATP-binding protein	0.438342	-0.357633	0.137445	-0.750089	-	0.392457
ADCSSKDPEKCELFIVEGDSA	C429	A0A125W7G8	OG1RF_10005	gyrB	DNA topoisomerase (ATP-hydrolyzing) subunit B	0.437032	-0.365311	0.138905	0.630614	-	-0.995926
NGQGEAGHLHCEK--------	C153	A0A125W1Y3	OG1RF_11826	HMPREF9498_02941	SUF system NifU family Fe-S cluster assembly protein	0.436478	-0.36856	0.153577	1.05869	-	-1.42725
FAKEVLPQEVCDVSSVKGNVH NGIPVVLVSRCSNGIAEDIYD	C196,C264	A0A125W8E0	OG1RF_10941	HMPREF9498_00855	asparaginase	0.434624	-0.379443	0.155255	0.159894	-	-0.539337
QVDAICHVVRCFDDENIMREQ LSHIRQVDAICHVVRCFDDEN	C106,C101	A0A125W7Q5	OG1RF_12541	ychF	redox-regulated ATPase YchF	0.433618	-0.385349	0.163929	0.315926	1.30327	-0.701274
GQAAKGLVELCQQAGAKVEGI	C140	A0A125W2B5	OG1RF_11798	xpt	xanthine phosphoribosyltransferase	0.432922	-0.389864	0.162997	-0.580574	2.10924	0.19071
KMAARFYPSWCQNLNQTAKKT	C123	A0A125W7I3	OG1RF_10109	HMPREF9498_01161	hypothetical protein	0.432569	-0.359889	0.066795	0	-	-0.359889
TMIIREPDFTCAKLTAEAAKN	C196	A0A125W667	OG1RF_12102	HMPREF9498_01362	pyridine nucleotide-disulfide oxidoreductase	0.43232	-0.392976	0.176569	2.25307	2.717	-2.64604
VVGPFLKMYQCGLPKEMAIEL TLKPEREGLFCERIFGPTKDW IRYKGIVCDRCGVEVTRSKVR	C346,C39,C69	A0A125WAN7	OG1RF_12492	rpoC	DNA-directed RNA polymerase subunit beta'	0.431332	-0.398791	0.218245	0.558592	3.30967	-0.957383
QKYGLSLEKICFDPGIGFHKT	C169	A0A125W4I0	OG1RF_12514	folP	dihydropteroate synthase	0.431305	-0.396537	0.0842685	1.09596	1.51794	-1.49249
KEKDTLDNILCKYLHLDNVQL LHLDNVQLIRCGAGNLTAAAR	C321,C334	A0A125W7H4	OG1RF_10099	arcA	arginine deiminase	0.430203	-0.405429	0.11845	1.32832	2.43993	-1.73375
IETVRKGIELCKENQVDVILA EGLMRTVIKNCPIALENPEDY	C89,C234	A0A125W7E6	OG1RF_10140	HMPREF9498_01202	NADH-dependent alcohol dehydrogenase	0.42797	-0.418581	0.171385	-0.127825	-	-0.290756
FGISGPAALRCSSFINQELTR ETELEKIYAPCVVLTTGGRTY	C252,C158	A0A125W1R5	OG1RF_11202	HMPREF9498_03182	NAD(P)/FAD-dependent oxidoreductase	0.426935	-0.424683	0.171031	3.83314	3.2844	-4.25782
VKFADADLIGCPIRITVGKKA EKAYSRIFERCGLEFRAIIGD NGREKSVIMGCYGIGVSRLLS	C524,C188,C440	A0A125W1Z4	OG1RF_11818	proS	proline--tRNA ligase	0.426496	-0.427269	0.152887	-0.159246	-	-0.268023
KEEYQAVAAACAKYDFYLEPT	C106	A0A125W3K3	OG1RF_10570	HMPREF9498_02698	oxo-acid lyase	0.423774	-0.439973	0.0961011	-0.505541	3.62214	0.0655683
QFMDKKIVTYCTGGIRCEKFS	C177	A0A125W5E4	OG1RF_10483	HMPREF9498_01928	rhodanese domain-containing protein	0.423721	-0.443654	0.16421	1.58749	3.93621	-2.03114
ISAKAEDGEPCVTYIGPNGAG	C169	A0A125W5M0	OG1RF_10782	gnd	phosphogluconate dehydrogenase (NADP(+)-dependent, decarboxylating)	0.423236	-0.446518	0.1243	-0.153698	2.2286	-0.29282
PVLQCIRCGSCLNVCPVYRHI CIRCGSCLNVCPVYRHIGGHG LGTAFQPVLQCIRCGSCLNVC AFQPVLQCIRCGSCLNVCPVY LPYASSLCGACTETCPVKIPL FGELPYASSLCGACTETCPVK SSLCGACTETCPVKIPLHELL	C319,C323,C313,C316,C369,C366,C373	A0A125W7E1	OG1RF_10887	HMPREF9498_00909	iron-sulfur cluster-binding protein	0.421694	-0.455635	0.0888189	0	-	-0.455635
LGYEVPVDVTCKQIEKLLLAS	C27	A0A125W880	OG1RF_10857	HMPREF9498_00945	N-acetyltransferase	0.419524	-0.468486	0.201214	0	-	-0.468486
TRCLKLVSPNCPVIQSLAERI	C112	A0A125W3E5	OG1RF_12467	HMPREF9498_02584	OsmC family peroxiredoxin	0.418886	-0.471041	0.147914	0	-	-0.471041
IKSKLYSVPDCQAITKKAIVN	C112	A0A125W7U8	OG1RF_10929	HMPREF9498_00866	class I SAM-dependent RNA methyltransferase	0.415118	-0.494625	0.185118	1.13481	2.20326	-1.62943
AGGIKEQTTQCLENIKAIIES	C343	A0A125W6U5	OG1RF_10108	HMPREF9498_01160	reactive intermediate/imine deaminase	0.413721	-0.510159	0.10103	-0.59889	1.74778	0.0887315
VELKVAEVIDCKKVKGADKLL HIGNSYTTIACDAMARYKRLM	C588,C39	A0A125WA61	OG1RF_10657	metG	methionine--tRNA ligase	0.410129	-0.524319	0.318215	2.274	2.79987	-2.79832
QLQRELKTRICLDENIRSLKD	C237	A0A125W8G3	OG1RF_10335	menC	o-succinylbenzoate synthase	0.409493	-0.529912	0.216257	0	-	-0.529912
NQKNQPPVLFCIEKK------	C183	A0A125W3Z1	OG1RF_10528	HMPREF9498_02261	rRNA methyltransferase	0.408119	-0.535595	0.186863	1.08452	-	-1.62011
AGKSTLSKIICGFITPQSGKI IIEHRLEDVLCESVDRIIVMN	C349,C211	A0A125W3V3	OG1RF_11694	HMPREF9498_02332	heme ABC transporter ATP-binding protein	0.402417	-0.570449	0.226176	-0.5791	-	0.00865078
FKVPIDGGFDCPNRDGTVAKG	C40	A0A125W402	OG1RF_10529	HMPREF9498_02260	TIGR01212 family radical SAM protein	0.402332	-0.57096	0.221979	0	-	-0.57096
GHNREETLAFCEKAKHTELLM KKDITFVRLACSGHAIPEDLD	C204,C379	A0A125W7U4	OG1RF_12204	HMPREF9498_00961	MBL fold metallo-hydrolase	0.40128	-0.57727	0.245985	-0.100196	-	-0.477074
VGIREAYNLFCQEQERAIYVI	C128	A0A125W8E9	OG1RF_10962	HMPREF9498_00831	DUF1836 domain-containing protein	0.399838	-0.585937	0.23683	1.06231	-	-1.64825
EDHGSYKEVICDDKSYEAKAV EAKAVIIATGCEHRKLGVKGE	C93,C109	A0A125W1Q0	OG1RF_11128	trxB	thioredoxin-disulfide reductase	0.399186	-0.58986	0.418346	-0.184136	-	-0.405724
SLLDFSSKEACWNSLIKTQAF	C79	A0A125W992	OG1RF_12165	HMPREF9498_00470	aminoglycoside 6-adenylyltransferase	0.398747	-0.580369	0.123683	0	-	-0.580369
VSESVIRNASCDVLVVRTDLD	C138	A0A125W9P6	OG1RF_11643	HMPREF9498_00277	universal stress protein	0.398571	-0.59356	0.270992	0.453453	4.28982	-1.04701
NWDDTDENGVCTATEDYKDVA TAKKKDSTGVCFIGEKNFKEF	C50,C200	A0A125W442	OG1RF_11673	trmU	tRNA 2-thiouridine(34) synthase MnmA	0.396821	-0.604098	0.288646	-0.701633	3.26885	0.0975349
HHDALEDSRACAEILLQQEQR	C154	A0A125W6U6	OG1RF_12100	HMPREF9498_01364	exonuclease	0.392317	-0.629654	0.229788	0.884821	-	-1.51448
GEANLAEVIGCRDDIMVYLIH VENPNKVADLCEEVIPVKDDL NNVPDWYIDSCSKIKYMFPKA	C1210,C809,C1268	A0A125W287	OG1RF_11811	polC	PolC-type DNA polymerase III	0.390343	-0.643256	0.278161	0	-	-0.643256
QEEKRIALIGCGNLGKALLKN	C90	A0A125W4U8	OG1RF_12233	rex	transcriptional regulator	0.389544	-0.648369	0.274787	1.90921	-	-2.55758
TQPERIVYVSCNPATLARDIA	C423	A0A125W5C2	OG1RF_10465	rumA	23S rRNA (uracil(1939)-C(5))-methyltransferase RlmD	0.389291	-0.649635	0.226066	0.0913978	-	-0.741033
AQGIHTTLDTCGKPFTREEPF GVRFIVFTQGCRMRCQFCHNP	C109,C32	A0A125W1G1	OG1RF_11328	pflA	pyruvate formate lyase-activating protein	0.389242	-0.649931	0.1911	0.5189	3.32721	-1.16883
IKIIGTGGITCGKDVFEHLLC	C264	A0A125W715	OG1RF_10228	pyrD	dihydroorotate oxidase	0.388361	-0.655553	0.260368	-0.637687	4.36803	-0.0178665
LGVYEITRRICEIFQRNYSVE	C78	A0A125W7S9	OG1RF_10920	HMPREF9498_00876	phosphohydrolase	0.38689	-0.664224	0.259461	-0.616819	-	-0.0474048
IEKRQNLKVACLEEIAYRMGY	C250	A0A125W3R3	OG1RF_11734	rfbA	glucose-1-phosphate thymidylyltransferase	0.386699	-0.665383	0.282596	0.46457	1.71158	-1.12995
ELSQTGADSICIKDMAGVLTP	C173	A0A125W7K1	OG1RF_12562	HMPREF9498_01028	oxaloacetate decarboxylase	0.383422	-0.685348	0.187316	1.23465	1.81603	-1.91999
RRFEREGVEKCIVSFDKSTET	C37	A0A125W985	OG1RF_12190	HMPREF9498_00443	DUF1797 domain-containing protein	0.383214	-0.686619	0.313828	-0.187265	-	-0.499353
YRNKAKNIKACAQQLLERFNG	C93	A0A125W800	OG1RF_10932	nth	endonuclease III	0.382234	-0.694461	0.269266	0	-	-0.694461
TFISEELPKICHQLFPQLSTK	C106	A0A125W4J0	OG1RF_10519	HMPREF9498_02269	esterase family protein	0.380032	-0.706074	0.211465	-0.0330991	-	-0.672975
MIPQRLSNGICSLNPHVPRLT	C342	A0A125W2M0	OG1RF_11994	rnr	ribonuclease R	0.37986	-0.708513	0.138231	1.79099	3.21405	-2.49951
YVTWRDAIQECFNRGCESCNM	C339	A0A125W2P7	OG1RF_12030	HMPREF9498_02723	aminoacyltransferase	0.379794	-0.707533	0.274011	-0.363032	-	-0.344501
IMLDGSGLSRCDFFLTSKNEL	C289	A0A125W9V5	OG1RF_10574	ddl	D-alanine--D-alanine ligase	0.379681	-0.708224	0.291622	1.12534	-	-1.83357
ERVAKLLPKICANYTIIDSKA	C274	A0A125W9T3	OG1RF_11611	HMPREF9498_00308	glucosamine--fructose-6-phosphate aminotransferase	0.37766	-0.720614	0.237537	0	-	-0.720614
RPIEDLKIITCHLGNGASITA	C206	A0A125W9I3	OG1RF_11644	ackA	acetate kinase	0.376666	-0.726719	0.156773	-0.453992	3.70947	-0.272728
TLRCKELATICDPRVRQWFEE	C251	A0A125W2Q3	OG1RF_11871	HMPREF9498_02894	ChbG/HpnK family deacetylase	0.370761	-0.750835	0.301121	0	-	-0.750835
TARNIANKMKCSTQPIYLEFK	C39	A0A125W3B6	OG1RF_11743	HMPREF9498_02484	TetR/AcrR family transcriptional regulator	0.370694	-0.762293	0.267668	0.818997	-	-1.58129
TGYEQDSMKFCIDLAQKEAVA	C338	A0A125W5Z3	OG1RF_11417	HMPREF9498_01650	pyridoxal phosphate-dependent aminotransferase	0.370249	-0.766286	0.314243	-0.537765	1.52783	-0.228521
EFIVFVGPSGCGKSTTLRMIA	C42	A0A125WA48	OG1RF_10665	HMPREF9498_00156	ABC transporter ATP-binding protein	0.369497	-0.76455	0.250935	3.15012	-	-3.91467
KQELGESALECAIREMKEELA	C43	A0A125W4C0	OG1RF_10512	HMPREF9498_02279	NUDIX hydrolase	0.368345	-0.76552	0.266134	0	-	-0.76552
VKVGIGPGSICTTRVVAGVGV	C314	A0A125W818	OG1RF_12538	guaB	IMP dehydrogenase	0.364103	-0.804449	0.278116	2.19536	4.30186	-2.99981
KLANFTERTNCVIHLNDLADT	C178	A0A125W197	OG1RF_11280	aroE	shikimate dehydrogenase	0.362435	-0.801138	0.148608	0	-	-0.801138
VTQRVLGAQLCSKNNCLEKIN	C386	A0A125W9T1	OG1RF_11594	HMPREF9498_00420	oxidoreductase	0.361623	-0.82533	0.360447	0.301837	-	-1.12717
EELIEVKIDACFVHVATKVHG QKAYLPTYSECRHLAEFVLAT	C66,C23	A0A125W747	OG1RF_12098	HMPREF9498_01366	gfo/Idh/MocA family oxidoreductase	0.360006	-0.830035	0.256375	0.0876352	-	-0.91767
SGEVRMILATCRATIGSVGNE	C173	A0A125W755	OG1RF_10154	rplB	50S ribosomal protein L2	0.358299	-0.840735	0.254049	-0.159882	1.46645	-0.680853
FSARKAIEQYCQLKKFPNVTI	C85	A0A125W1S5	OG1RF_11085	HMPREF9498_03293	pyridoxal phosphate-dependent aminotransferase	0.351671	-0.882497	0.436339	-0.399947	2.60795	-0.48255
PLYYRAEPVGCTSTIIYKMFK	C118	A0A125W146	OG1RF_11327	ppaC	manganese-dependent inorganic pyrophosphatase	0.349938	-0.893481	0.252973	-0.564325	-	-0.329156
KQIYISTTSACSSRKKMASST	C325	A0A125W4I7	OG1RF_10258	HMPREF9498_02151	cysteine desulfurase	0.348004	-0.905757	0.274487	2.52573	3.31835	-3.43149
VGVGLPDTGRCIISVEEGKIH DSTQALAHPDCVAVFTAKDVP	C600,C220	A0A125W2X1	OG1RF_11951	HMPREF9498_02805	selenium-dependent xanthine dehydrogenase	0.347162	-0.903812	0.309363	0	-	-0.903812
RKATDYFYQLCKTNNYIKTKA	C120	A0A125W7H9	OG1RF_10851	galT	UDP-glucose--hexose-1-phosphate uridylyltransferase	0.342329	-0.929437	0.326738	0	-	-0.929437
VANKKSIAWGCAKALKDQGAN	C23	A0A125W6Z1	OG1RF_10225	fabI	enoyl-[acyl-carrier-protein] reductase FabI	0.341105	-0.950118	0.357151	0.484203	1.7195	-1.43432
GEGNVNSVVHCATRLRFKLKD	C39	A0A125W2X5	OG1RF_11976	HMPREF9498_02779	PTS beta-glucoside transporter subunit EIIBCA	0.340019	-0.952176	0.606379	-11.2645	-	10.3123
AVFAKSAVIYCPGKAANAGGV KVVAEGANMPCTLEAVAVFAK GKSDAEVMRFCQSFMTELQKH	C367,C351,C147	A0A125W1G3	OG1RF_11203	HMPREF9498_03181	NADP-specific glutamate dehydrogenase	0.337524	-0.972877	0.24024	-0.0764944	-	-0.896383
LKELVVAPEKCTDLNDYLTRF	C61	A0A125W7J8	OG1RF_10119	add	adenosine deaminase	0.336062	-0.974873	0.352512	0.352658	-	-1.32753
YAVQKAIKEVCPEVWQAQPRT	C332	A0A125W4C2	OG1RF_10545	HMPREF9498_02244	beta-galactosidase	0.329815	-0.982073	0.190248	0	-	-0.982073
HRDRIAFVRICSGVFERGMDV	C320	A0A125W5E3	OG1RF_10439	prfC	peptide chain release factor 3	0.327673	-1.03576	0.209419	1.23553	2.52623	-2.27129
LTELVASDLSCKDLFDELIAV	C22	A0A125W307	OG1RF_12408	HMPREF9498_02640	hypothetical protein	0.326689	-1.03038	0.393562	2.06318	-	-3.09356
------MAKVCYFTGRKTSSG	C5	A0A125W3B9	OG1RF_12380	rpmB	50S ribosomal protein L28	0.326079	-1.04735	0.270239	-1.35726	-	0.309901
GIDIFYNKDICEHIGNCVRGN NKDICEHIGNCVRGNPEVFEV	C38,C44	A0A125W2K4	OG1RF_11998	HMPREF9498_02757	hypothetical protein	0.326039	-0.996807	0.217525	2.6125	2.59328	-3.6093
EKVKTESFVLCPKFEKSFSIL	C12	A0A125W841	OG1RF_10892	HMPREF9498_00904	transcriptional regulator	0.325471	-1.04955	0.421814	1.81913	2.45135	-2.86868
RYFLERVIPVCEEENIKMGIH	C200	A0A125W3Q6	OG1RF_12398	uxuA	mannonate dehydratase	0.322297	-1.07226	0.385342	-0.719456	-	-0.352805
EEIEQLRIQLCSRETGLLAGA	C40	A0A125W8S9	OG1RF_10349	dapF	diaminopimelate epimerase	0.321407	-1.08197	0.398304	0.230545	1.7572	-1.31251
HGGWKKTVGLCNVPIGHRKQA	C173	A0A125W284	OG1RF_11199	HMPREF9498_03185	6-phospho-beta-glucosidase	0.3164	-1.08546	0.185913	0	-	-1.08546
YLAFENNYRYCSGVVGSGNKN	C93	A0A125W1G8	OG1RF_11206	HMPREF9498_03178	ribonucleotide reductase assembly protein NrdI	0.31633	-1.12355	0.442498	-0.539752	-	-0.583797
LQQAQARHIPCAVASASKNAP	C111	A0A125W3B5	OG1RF_12426	pgmB	beta-phosphoglucomutase	0.309444	-1.15808	0.578455	-0.0088414	-	-1.14924
RLVEGDHNIDCKVDGFGPMKL	C106	A0A125W1V2	OG1RF_11162	HMPREF9498_03222	hypothetical protein	0.309074	-1.16021	0.421519	-0.827429	-	-0.332782
AVVTKSFPENCVIAGNPARII	C172	A0A125W8Q7	OG1RF_10195	HMPREF9498_00640	chorismate mutase	0.308523	-1.1643	0.489833	1.28276	2.08389	-2.44706
PFSFKSQGSVCSVGNTRALGI	C351	A0A125W3T4	OG1RF_11660	HMPREF9498_02388	NAD(P)/FAD-dependent oxidoreductase	0.305377	-1.18564	1.85139	1.6123	3.06002	-2.79794
RDDYESIAPTCKGVIVKEHAR	C71	A0A125W5Z9	OG1RF_11428	carA	carbamoyl-phosphate synthase small subunit	0.303579	-1.19789	0.373853	4.2753	1.80381	-5.47319
EAKILGGIGPCGRQLCCSTFL	C161	A0A125W6M4	OG1RF_12122	HMPREF9498_01340	signal peptidase II	0.301975	-1.20528	0.444983	12.2271	-	-13.4324
WASGIKSPIYCDNRITMSYPA	C53	A0A125W5S3	OG1RF_11423	pyrE	orotate phosphoribosyltransferase	0.300141	-1.22142	0.672676	3.08608	1.99729	-4.3075
RYWEGRIIVACVASNLQRVQQ	C230	A0A125W7Q2	OG1RF_10957	rnj	RNase J family beta-CASP ribonuclease	0.298879	-1.2301	0.3329	0.620252	3.08624	-1.85035
LFVQGYKVILCDSEKDPEKER	C96	A0A125W1W7	OG1RF_11320	HMPREF9498_03065	LacI family transcriptional regulator	0.297915	-1.17654	0.248231	0	-	-1.17654
THRKSVIINRCQFELDKARKR	C367	A0A125W1V7	OG1RF_11330	parC	DNA topoisomerase IV subunit A	0.296712	-1.23655	0.503381	-0.615825	-	-0.620723
GKENISAVSHCATRMRFVLKD	C27	A0A125W3T5	OG1RF_11753	treP	PTS trehalose transporter subunit IIBC	0.295556	-1.25305	2.1612	-0.264602	-	-0.988448
VDLYVDFAKTCFELFGDRVKK	C151	A0A125WAI1	OG1RF_10753	gmuD	glycoside hydrolase family 1 protein	0.294901	-1.24385	0.341678	-0.207191	-	-1.03666
NGLKLSPVTQCLIEKSIAGFK	C210	A0A125W611	OG1RF_11427	carB	carbamoyl-phosphate synthase large subunit	0.284193	-1.33318	0.362911	5.20552	1.69307	-6.53871
VKNDQIKKPVCGVAIRTVDNH	C308	A0A125W3D7	OG1RF_11726	HMPREF9498_02467	ABC transporter ATP-binding protein	0.283381	-1.33847	0.810801	1.00694	1.65816	-2.34541
NVKAIELNISCPNVKHGGIAF	C132	A0A125W5Y7	OG1RF_11425	pyrDB	dihydroorotate dehydrogenase	0.27487	-1.39949	0.35144	2.44228	2.22243	-3.84178
KEHGTDIDAACGQLRSKQMKK	C341	A0A125W3E8	OG1RF_11655	rlmN	23S rRNA (adenine(2503)-C(2))-methyltransferase RlmN	0.273195	-1.38198	0.305885	0.696131	1.53583	-2.07811
IEPHHRVLDACAAPGGKTTHI	C266	A0A125W3H5	OG1RF_12386	sun	16S rRNA (cytosine(967)-C(5))-methyltransferase RsmB	0.272946	-1.41345	1.01664	0.98327	-	-2.39672
INPKRTDLIDCFKTLDVPQFT	C458	A0A125W7C3	OG1RF_12564	citF	citrate lyase subunit alpha	0.258132	-1.52305	0.309303	-0.251787	-	-1.27127
INQIDHSNETCRLIYRVEGAG	C67	A0A125W5E5	OG1RF_11426	pyrK	dihydroorotate dehydrogenase	0.256402	-1.53262	0.398513	3.23979	1.537	-4.7724
TGGVHLHTIRCADEETFQEIK PLEGIERKIACQHTPEQTREE	C148,C73	A0A125W932	OG1RF_10196	HMPREF9498_00641	transcription repressor NadR	0.253845	-1.54745	0.73381	8.37545	-	-9.9229
KWQKYWAKNNCFNTLDDPNKE	C21	A0A125W4A7	OG1RF_10534	leuS	leucine--tRNA ligase	0.248459	-1.59598	0.543345	3.1215	2.48226	-4.71748
VRNKISGTAECPRLNIFRSNK	C31	A0A125W787	OG1RF_10167	rplR	50S ribosomal protein L18	0.241221	-1.65333	2.54106	-0.653723	1.84195	-0.999604
EILAIVGESGCGKSTLATTIM	C59	A0A125W3D1	OG1RF_12370	HMPREF9498_02679	ABC transporter ATP-binding protein	0.23858	-1.54887	0.283659	0	-	-1.54887
LTQEEEQKNLCYYPKGLSNYL	C187	A0A125W9M4	OG1RF_10572	HMPREF9498_00064	hypothetical protein	0.228083	-1.73673	0.65937	1.90437	-	-3.64109
LEARRAQLELCERSSELEEVE	C84	A0A125W1H5		HMPREF9498_03092	hypothetical protein	0.22762	-1.74274	0.32494	0	-	-1.74274
ITQSELANGICTQATISNIEN	C39	A0A125W155	OG1RF_11316	HMPREF9498_03069	transcriptional regulator	0.222828	-1.75134	0.3805	0	-	-1.75134
ANEQGVRIVLCTGRPLPGVKE	C42	A0A125W7V8	OG1RF_10919	HMPREF9498_00877	Cof-type HAD-IIB family hydrolase	0.221618	-1.80912	0.278651	-0.156559	-	-1.65256
QFYVNEGKLSCQLYQRSADVF	C212	A0A125W174	OG1RF_11295	thyA	thymidylate synthase	0.221308	-1.80872	0.496866	0.0935244	-	-1.90224
LERNRDIIKNCLAEADEQTRV	C79	A0A125W8J3	OG1RF_11052	HMPREF9498_00685	transcriptional regulator	0.212529	-1.71001	0.753918	0	-	-1.71001
LDLDDPNSSNCRIIHNRGERV	C124	A0A125W7U2	OG1RF_12547	HMPREF9498_01012	oleate hydratase	0.200084	-1.96957	0.602571	0.580624	-	-2.5502
KGYGDNAKYICNYLLEAKAPV	C61	A0A125W3T2	OG1RF_11713	HMPREF9498_02312	CDP-glycerol glycerophosphotransferase	0.192349	-1.97315	0.570387	-1.91298	-	-0.0601705
VKAIDKGALDCTIKARMITVL	C76	A0A125W7H1	OG1RF_12566	citD	citrate lyase ACP	0.188655	-2.09485	0.51782	-0.554477	-	-1.54038
QKVVIDPVIACKGTAQILQPK	C110	A0A125W764	OG1RF_10148	thiD	bifunctional hydroxymethylpyrimidine kinase/phosphomethylpyrimidine kinase	0.184145	-2.14393	0.412717	0.0832318	-	-2.22716
PVVTPRFIPSCTEEALKGLGE	C217	A0A125W2X7	OG1RF_11862	guaD	guanine deaminase	0.170855	-2.23493	0.648065	-0.502844	-	-1.73209
TKNGYKDVQRCVSSIIEKTTY	C456	A0A125W3Q2	OG1RF_11724	HMPREF9498_02465	glycosyltransferase family 2 protein	0.140078	-2.58977	0.997848	0.991609	-	-3.58138
SVVPDIDTRVCSLQTKRFNQE	C66	A0A125W525	OG1RF_12232	HMPREF9498_02035	thiol peroxidase	0.113337	-2.71316	2.61897	0.495499	2.93536	-3.20865
NYDIKQLALECATKRMYPDVL	C376	A0A125W6T6	OG1RF_12115	nrdD	anaerobic ribonucleoside-triphosphate reductase	0.10939	-3.00975	0.701719	1.84629	1.92417	-4.85604
FLNLVRQQADCTWFAKVESQN	C95	A0A125WAD0	OG1RF_10630	mvaD	diphosphomevalonate decarboxylase	0.0650212	-3.5857	0.690988	-0.311644	2.64767	-3.27406
QSQGSSSENDCLKMIYHFYEE	C146	A0A125W909	OG1RF_11049	HMPREF9498_00682	DnaD domain protein	0	-3.22302	-	0	-	-3.22302
KYRIQVSVKDCTGCGLCVEAC IQVSVKDCTGCGLCVEACPAK SVKDCTGCGLCVEACPAKGKA CTGCGLCVEACPAKGKALVMK	C761,C764,C767,C771	A0A125W3Q7	OG1RF_11699	nifJ	pyruvate:ferredoxin (flavodoxin) oxidoreductase	0	-4.07626	-	0	-	-4.07626
AKKLVKKSGICVVQVPEGVNF	C77	A0A125W8Q3	OG1RF_10297	mtlF	mannitol-specific phosphotransferase enzyme IIA component	0	-4.62703	-	0	-	-4.62703
LVVSGRKTATCSSLDIYKMEE	C52	A0A125W3F3	OG1RF_12396	HMPREF9498_02653	ASCH domain-containing protein	0	-4.65941	-	0	-	-4.65941
ENARLEGTVRCFSVATRNRVE	C259	A0A125W759	OG1RF_10181	HMPREF9498_01244	amidohydrolase	0	-4.6761	-	0.748475	5.64798	-5.42458
VSRMLGGSFRCTTQALIRE--	C315	A0A125WAJ2	OG1RF_12254	HMPREF9498_00032	amidinotransferase	0	-4.85817	-	0.107969	-	-4.96614
PTSDRIIQFGCVLVQDGKIIA	C35	A0A125W2A9	OG1RF_11808	dinG	DNA polymerase III subunit epsilon	0	-4.95119	-	3.0501	2.61022	-8.00129
YNGSVSGGTHCIDEGCYVVDN SGGTHCIDEGCYVVDNHCVRT DEGCYVVDNHCVRTIHAEMNA	C53,C58,C65	A0A125W2Q4	OG1RF_11879	HMPREF9498_02885	ComE operon protein 2	0	-4.95251	-	1.49658	1.86601	-6.44909
GDNKLKVVATCVRIPVISGHS	C244	A0A125W8D9	OG1RF_10955	asd	aspartate-semialdehyde dehydrogenase	0	-5.47314	-	0.0139948	-	-5.48713
IHSKTYTGGICRIEDDGIVQY	C84	A0A125W369	OG1RF_12310	HMPREF9498_02556	peptidase	0	-5.49068	-	0	-	-5.49068
VNIQQRLKGFCSVYTEKVQLI	C223	A0A125WAT2	OG1RF_12245	HMPREF9498_00041	LacI family transcriptional regulator	0	-5.52649	-	0	-	-5.52649
EMTQYFGIQRCIVVAGDSDIQ	C110	A0A125WA54	OG1RF_11627	HMPREF9498_00294	SorC family transcriptional regulator	0	-6.16204	-	0	-	-6.16204
-----MIKEFCAENFTKIPQA	C6	A0A125W2R8	OG1RF_12037	cutC	copper homeostasis protein CutC	0	-9.04692	-	-0.527142	2.407	-8.51977
	a KEGG database locus tags
	b Gene names based on UniProt entry
	c Persulfidated peptides not found in WT or WT+Na2S were assigned a peak are of 1.00E5, equal to lowest detectable peptide, for calculating change in persulfidated peptide yield
	d Proteins not identified in WT or WT+Na2S no-enrichment proteomic analysis were assigned a fractional abundance of 1E-9, equal to lowest detected protein, for calculating change in protein abundance for normalization calculation
